# Supplementary material for: Mechanistic insights into nickel- and gold-catalyzed diastereoselective [4 + 2 + 1] cycloadditions between dienynes and diazo compounds: a DFT study
Source: Royal Society of Chemistry journal article supplement (doi:10.1039/d1qo01468d), 2021-12-03
Supplement: d1qo01468d1.pdf [file d1qo01468d1.pdf]

*Supporting Information*

**Mechanistic Insights into Nickel- and Gold-Catalyzed  
Diastereoselective [4 + 2 + 1] Cycloadditions between Dienynes and  
Diazo Compounds: A DFT Study**

Kang Lv<sup>a,b</sup> and Xiaoguang Bao<sup>\*a</sup>

<sup>a</sup> *Innovation Center for Chemical Sciences, College of Chemistry, Chemical Engineering and Materials Science,  
Soochow University, 199 Ren-Ai Road, Suzhou Industrial Park, Suzhou, Jiangsu 215123, China.*

<sup>b</sup> *School of Engineering, Jining University, Qufu, Shandong 273155, China.*

E-mail: xgbao@suda.edu.cn

**Contents**

|                                                    |                 |
|----------------------------------------------------|-----------------|
| <b>1. Figures S1 ~ S9</b> .....                    | <b>S2 ~ S6</b>  |
| <b>2. Tables S1 ~ S2</b> .....                     | <b>S7 ~ S8</b>  |
| <b>3. Cartesian Coordinates and Energies</b> ..... | <b>S9 ~ S83</b> |

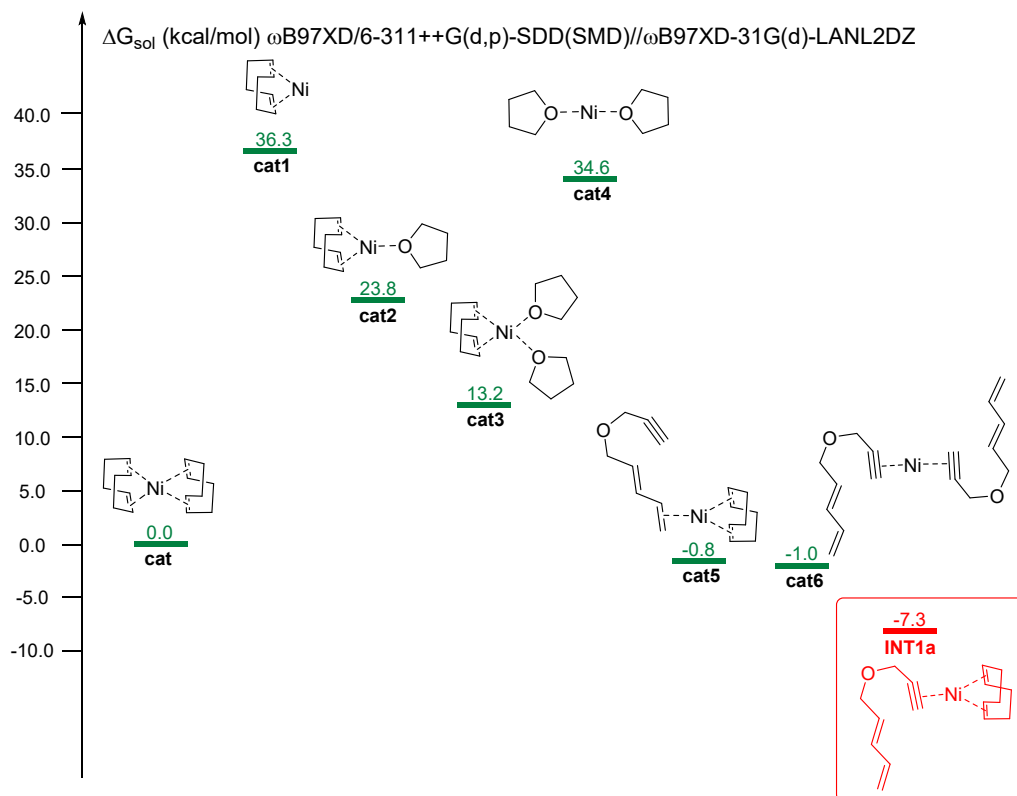

**Fig. S1** Energetics of possible L-Ni(0) complexes with different ligands.

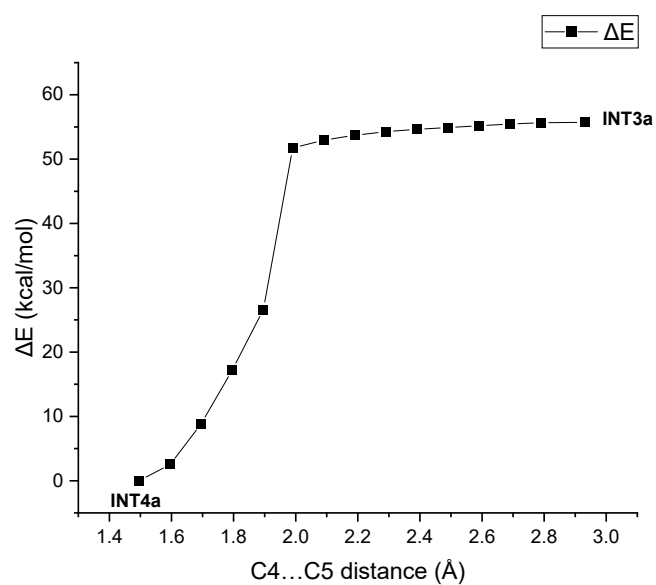

**Fig. S2** Potential energy surface scan for the cleavage of C<sup>4</sup>-C<sup>5</sup> bond in INT4a.



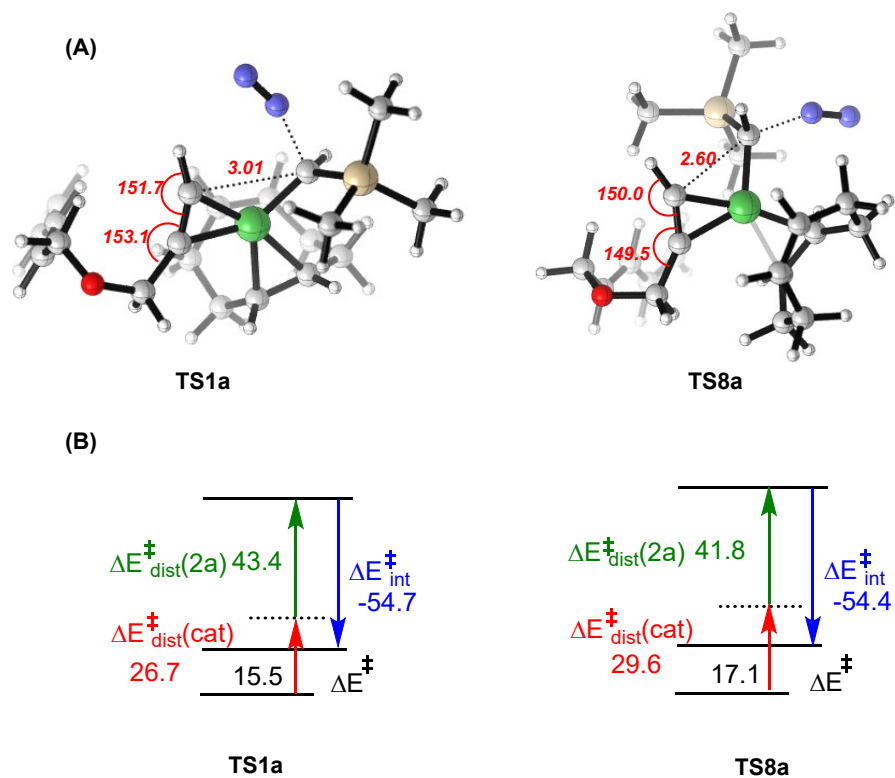

**Fig. S5** (A) Geometrical features for **TS1a** and **TS8a** with key bond distance in Å. (B) Distortion, interaction and activation energies for **TS1a** and **TS8a** (green arrow: distortion energy of substrate **2a**; red arrow: distortion energy of the organometallic moiety; blue arrow: interaction energy; black: activation energy, in kcal/mol).

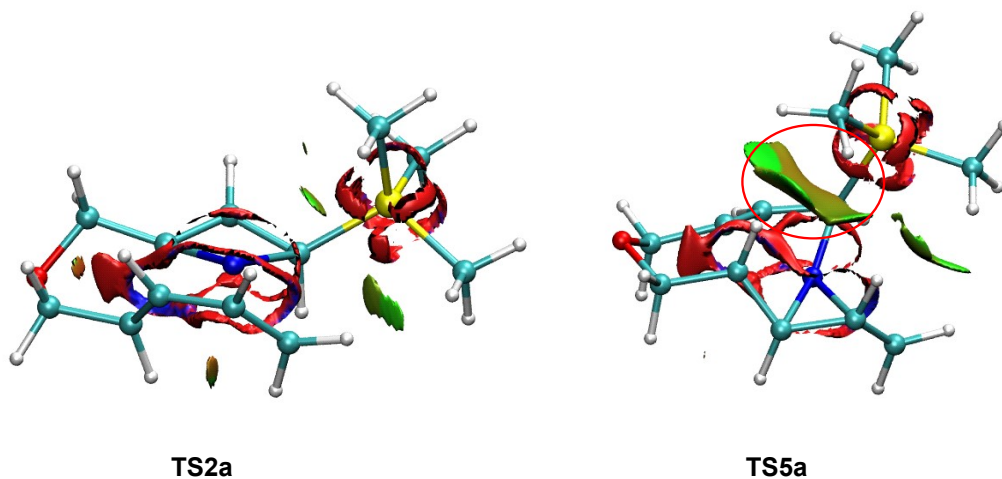

**Fig. S6** NCI analysis of **TS2a** and **TS5a** with key steric repulsions highlighted by the red circles.

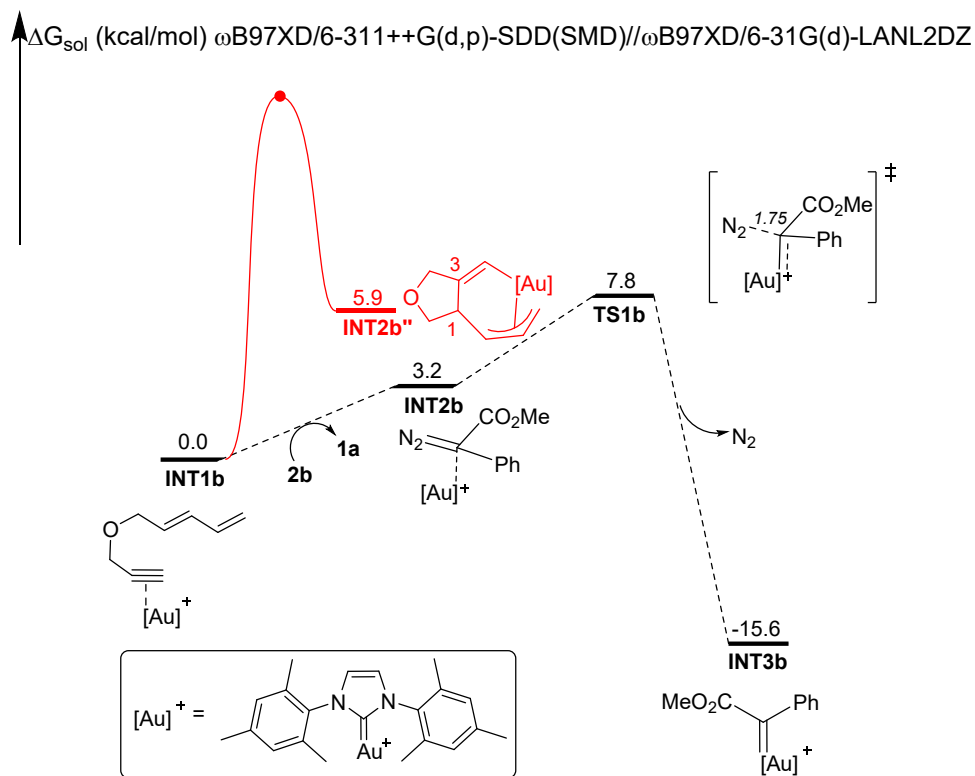

**Fig. S7** Free energy profiles for intramolecular cyclization of **INT1b** to form **INT2b''**.

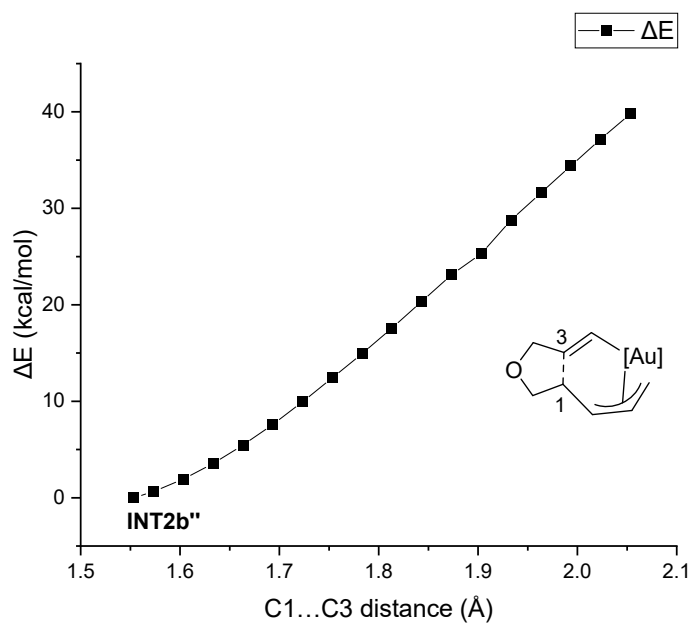

**Fig. S8** Potential energy surface scan for the cleavage of C<sup>1</sup>–C<sup>3</sup> bond in **INT2b''**.

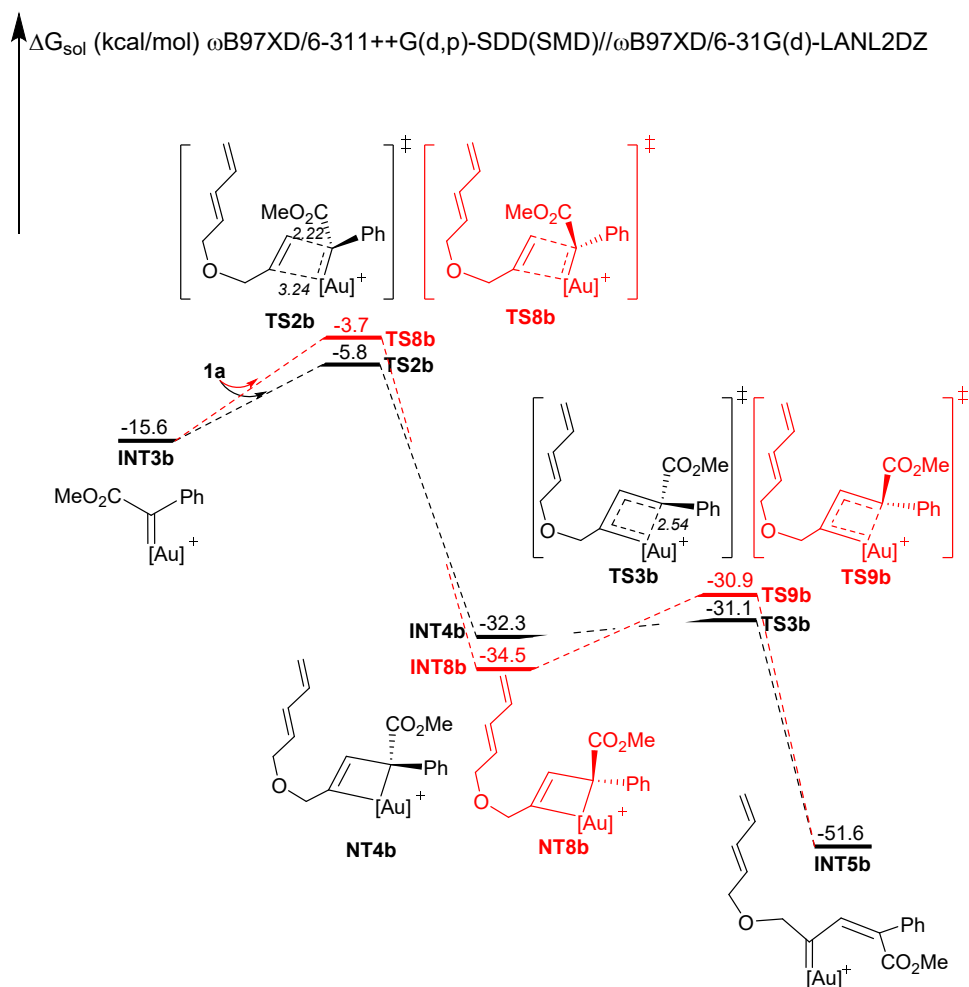

**Fig. S9** Free energy profiles for the alkynyl insertion of **1a** from *Si/Re* faces followed by cleavage of Au–C bond to form **INT5b**.

**Table S1.** Comparative calculations of  $\Delta\Delta G$  for the vinyl Ni(0)/Au(I)-carbene intermediates in different systems.

**INT4a** 0.0

**INT4a'** 18.2

$L_1 =$

**INT4b** 0.0

**INT5b** -17.1

$L_2 =$

| entry | 1a | 2a/2b | solvent           | ligand         | transition-metal | $\Delta\Delta G(\text{VMC})$ |
|-------|----|-------|-------------------|----------------|------------------|------------------------------|
| 1     | 1a | 2a    | THF               | L <sub>1</sub> | Ni               | 18.2                         |
| 2     | 1a | 2b    | CHCl <sub>3</sub> | L <sub>2</sub> | Au               | -17.1                        |
| 3     | 1a | 2b    | THF               | L <sub>1</sub> | Ni               | 18.9                         |
| 4     | 1a | 2a    | CHCl <sub>3</sub> | L <sub>2</sub> | Au               | -14.0                        |
| 5     | 1a | 2a    | CHCl <sub>3</sub> | L <sub>1</sub> | Ni               | 17.9                         |
| 6     | 1a | 2b    | THF               | L <sub>2</sub> | Au               | -17.2                        |
| 7     | 1a | 2a    | THF               | L <sub>2</sub> | Ni               | 10.4                         |
| 8     | 1a | 2b    | CHCl <sub>3</sub> | L <sub>1</sub> | Au               | -7.3                         |
| 9     | 1a | 2a    | THF               | L <sub>1</sub> | Au               | -1.7                         |
| 10    | 1a | 2b    | CHCl <sub>3</sub> | L <sub>2</sub> | Ni               | 26.4                         |

**Table S2.** The calculated  $\Delta G^\ddagger$  of key transition states using different combinations of functionals and basis sets.

| Entry | Key transition states                     | $\Delta G^\ddagger$ (kcal/mol)<br>( $\omega$ B97XD/<br>6-31G(d)-<br>LANL2DZ) | $\Delta G^\ddagger$ (kcal/mol)<br>( $\omega$ B97XD/<br><b>6-31G(d,p)</b> -<br>LANL2DZ) | $\Delta G^\ddagger$ (kcal/mol)<br>( <b>M06</b> /<br>6-31G(d)-<br>LANL2DZ) |
|-------|-------------------------------------------|------------------------------------------------------------------------------|----------------------------------------------------------------------------------------|---------------------------------------------------------------------------|
| 1     | <b>TS1a</b> (relative to <b>INT1a</b> )   | 21.6                                                                         | 22.0                                                                                   | 21.5                                                                      |
| 2     | <b>TS1a'</b> (relative to <b>INT1a</b> )  | 36.9                                                                         | 36.9                                                                                   | 33.2                                                                      |
| 3     | <b>TS1a''</b> (relative to <b>INT1a</b> ) | 43.7                                                                         | 43.2                                                                                   | 37.7                                                                      |
| 4     | <b>TS8a</b> (relative to <b>INT1a</b> )   | 23.6                                                                         | 23.1                                                                                   | 22.9                                                                      |
| 5     | <b>TS2a</b> (relative to <b>INT4a</b> )   | 17.7                                                                         | 17.7                                                                                   | 15.7                                                                      |
| 6     | <b>TS5a</b> (relative to <b>INT4a</b> )   | 22.4                                                                         | 22.0                                                                                   | 19.8                                                                      |
| 7     | <b>TS3a</b> (relative to <b>INT7a</b> )   | 4.4                                                                          | 4.6                                                                                    | 3.5                                                                       |
| 8     | <b>TS3a'</b> (relative to <b>INT7a</b> )  | 19.8                                                                         | 19.8                                                                                   | 19.8                                                                      |
| 9     | <b>TS4a</b> (relative to <b>INT9a</b> )   | 23.0                                                                         | 22.6                                                                                   | 22.1                                                                      |
| 10    | <b>TS4a'</b> (relative to <b>INT9a</b> )  | 42.5                                                                         | 42.2                                                                                   | 39.1                                                                      |
| 11    | <b>TS1b</b> (relative to <b>INT1b</b> )   | 7.8                                                                          | 7.7                                                                                    | 10.8                                                                      |
| 12    | <b>TS1b'</b> (relative to <b>INT1b</b> )  | 16.2                                                                         | 16.3                                                                                   | 13.4                                                                      |
| 13    | <b>TS2b</b> (relative to <b>INT3b</b> )   | 9.8                                                                          | 11.4                                                                                   | 13.9                                                                      |
| 14    | <b>TS8b</b> (relative to <b>INT3b</b> )   | 11.9                                                                         | 12.3                                                                                   | 15.4                                                                      |
| 15    | <b>TS4b</b> (relative to <b>INT5b</b> )   | 8.8                                                                          | 8.3                                                                                    | 8.5                                                                       |
| 16    | <b>TS6b</b> (relative to <b>INT5b</b> )   | 10.4                                                                         | 9.7                                                                                    | 10.4                                                                      |



## Cartesian Coordinates and Energies

1a

| Center Number | Atomic Number | Atomic Type | Coordinates (Angstroms) |           |           |
|---------------|---------------|-------------|-------------------------|-----------|-----------|
|               |               |             | X                       | Y         | Z         |
| 1             | 6             | 0           | -2.202597               | 1.062608  | 0.215453  |
| 2             | 6             | 0           | -2.475160               | 2.058151  | -0.406384 |
| 3             | 1             | 0           | -2.731828               | 2.941487  | -0.946861 |
| 4             | 6             | 0           | -1.842052               | -0.153640 | 0.963300  |
| 5             | 1             | 0           | -0.909990               | 0.036892  | 1.515188  |
| 6             | 1             | 0           | -2.624132               | -0.385401 | 1.691636  |
| 7             | 8             | 0           | -1.724611               | -1.300790 | 0.152273  |
| 8             | 6             | 0           | -0.690685               | -1.216428 | -0.818880 |
| 9             | 1             | 0           | -0.858961               | -0.355972 | -1.482395 |
| 10            | 1             | 0           | -0.797588               | -2.130120 | -1.411292 |
| 11            | 6             | 0           | 0.675787                | -1.140563 | -0.202764 |
| 12            | 6             | 0           | 1.494505                | -0.091108 | -0.334246 |
| 13            | 1             | 0           | 0.981144                | -1.995951 | 0.400297  |
| 14            | 1             | 0           | 1.166871                | 0.767121  | -0.923056 |
| 15            | 6             | 0           | 2.822168                | -0.004223 | 0.266731  |
| 16            | 6             | 0           | 3.630937                | 1.050176  | 0.137174  |
| 17            | 1             | 0           | 3.146807                | -0.863469 | 0.852847  |
| 18            | 1             | 0           | 4.610258                | 1.078595  | 0.603932  |
| 19            | 1             | 0           | 3.336893                | 1.923308  | -0.440789 |

Zero-point correction= 0.158819 (Hartree/Particle)  
Thermal correction to Energy= 0.168840  
Thermal correction to Enthalpy= 0.169784  
Thermal correction to Gibbs Free Energy= 0.122177  
Sum of electronic and zero-point Energies= -385.666385  
Sum of electronic and thermal Energies= -385.656365  
Sum of electronic and thermal Enthalpies= -385.655420  
Sum of electronic and thermal Free Energies= -385.703027  
ωB97XD /6-311++G(d,p)-SDD/SMD//ωB97XD /6-31G(d)-LANL2DZ energy in tetrahydrofuran solvent = -385.9433636

2a

| Center Number | Atomic Number | Atomic Type | Coordinates (Angstroms) |           |           |
|---------------|---------------|-------------|-------------------------|-----------|-----------|
|               |               |             | X                       | Y         | Z         |
| 1             | 6             | 0           | -0.902123               | 0.998777  | 0.002306  |
| 2             | 7             | 0           | -2.059507               | 0.414648  | 0.000879  |
| 3             | 7             | 0           | -3.055431               | -0.136438 | -0.000497 |
| 4             | 1             | 0           | -0.959462               | 2.083332  | 0.004858  |
| 5             | 14            | 0           | 0.670974                | -0.010347 | -0.000087 |
| 6             | 6             | 0           | 1.683448                | 0.400287  | -1.534077 |
| 7             | 1             | 0           | 2.633280                | -0.147343 | -1.534994 |
| 8             | 1             | 0           | 1.139818                | 0.137704  | -2.447799 |
| 9             | 1             | 0           | 1.917785                | 1.469805  | -1.581314 |
| 10            | 6             | 0           | 1.684684                | 0.395568  | 1.534357  |
| 11            | 1             | 0           | 1.141857                | 0.129512  | 2.447578  |
| 12            | 1             | 0           | 2.634867                | -0.151434 | 1.532684  |
| 13            | 1             | 0           | 1.918330                | 1.465066  | 1.585101  |
| 14            | 6             | 0           | 0.165319                | -1.823012 | -0.002422 |
| 15            | 1             | 0           | 1.052307                | -2.466479 | -0.002419 |
| 16            | 1             | 0           | -0.428534               | -2.077072 | 0.882668  |
| 17            | 1             | 0           | -0.427293               | -2.075426 | -0.888806 |

Zero-point correction= 0.137025 (Hartree/Particle)  
Thermal correction to Energy= 0.147684  
Thermal correction to Enthalpy= 0.148628  
Thermal correction to Gibbs Free Energy= 0.100780  
Sum of electronic and zero-point Energies= -557.181216

Sum of electronic and thermal Energies= -557.170558  
 Sum of electronic and thermal Enthalpies= -557.169614  
 Sum of electronic and thermal Free Energies= -557.217461  
 ωB97XD /6-311++G(d,p)-SDD/SMD//ωB97XD /6-31G(d)-LANL2DZ energy in tetrahydrofuran solvent = -557.4181792

**(1R, 5S)-3a**

| Center Number | Atomic Number | Atomic Type | Coordinates (Angstroms) |           |           |
|---------------|---------------|-------------|-------------------------|-----------|-----------|
|               |               |             | X                       | Y         | Z         |
| 1             | 6             | 0           | 1.549245                | -0.714075 | 0.044601  |
| 2             | 6             | 0           | 0.246106                | -0.762944 | 0.297989  |
| 3             | 1             | 0           | -0.138962               | -1.565996 | 0.928452  |
| 4             | 6             | 0           | 2.632071                | -1.646779 | 0.534943  |
| 5             | 1             | 0           | 2.500064                | -1.964259 | 1.572625  |
| 6             | 1             | 0           | 2.694057                | -2.547857 | -0.100547 |
| 7             | 8             | 0           | 3.827975                | -0.896189 | 0.446218  |
| 8             | 6             | 0           | 3.701094                | -0.087522 | -0.707404 |
| 9             | 1             | 0           | 3.929562                | -0.674751 | -1.611851 |
| 10            | 1             | 0           | 4.428674                | 0.724341  | -0.628211 |
| 11            | 6             | 0           | 2.233576                | 0.388977  | -0.742915 |
| 12            | 6             | 0           | 2.024384                | 1.760781  | -0.133506 |
| 13            | 1             | 0           | 1.875369                | 0.400693  | -1.782144 |
| 14            | 1             | 0           | 2.899671                | 2.410135  | -0.149508 |
| 15            | 6             | 0           | 0.909131                | 2.257381  | 0.404746  |
| 16            | 6             | 0           | -0.458465               | 1.632810  | 0.553063  |
| 17            | 1             | 0           | 0.971969                | 3.269237  | 0.806388  |
| 18            | 1             | 0           | -0.651991               | 1.488888  | 1.626952  |
| 19            | 1             | 0           | -1.193425               | 2.380867  | 0.222309  |
| 20            | 6             | 0           | -0.704736               | 0.306045  | -0.194659 |
| 21            | 1             | 0           | -0.497612               | 0.491590  | -1.261125 |
| 22            | 14            | 0           | -2.517185               | -0.257171 | -0.103881 |
| 23            | 6             | 0           | -2.995055               | -0.546761 | 1.698337  |
| 24            | 1             | 0           | -2.953512               | 0.384026  | 2.275312  |
| 25            | 1             | 0           | -4.014912               | -0.940052 | 1.777092  |
| 26            | 1             | 0           | -2.325360               | -1.266998 | 2.181946  |
| 27            | 6             | 0           | -2.688309               | -1.860491 | -1.081122 |
| 28            | 1             | 0           | -3.702555               | -2.268396 | -1.004784 |
| 29            | 1             | 0           | -2.473349               | -1.697512 | -2.143423 |
| 30            | 1             | 0           | -1.992591               | -2.624607 | -0.716753 |
| 31            | 6             | 0           | -3.634978               | 1.064567  | -0.852776 |
| 32            | 1             | 0           | -3.349146               | 1.286620  | -1.887357 |
| 33            | 1             | 0           | -4.678901               | 0.730605  | -0.862533 |
| 34            | 1             | 0           | -3.594643               | 2.001388  | -0.286028 |

Zero-point correction= 0.297023 (Hartree/Particle)  
 Thermal correction to Energy= 0.313248  
 Thermal correction to Enthalpy= 0.314193  
 Thermal correction to Gibbs Free Energy= 0.253588  
 Sum of electronic and zero-point Energies= -833.541725  
 Sum of electronic and thermal Energies= -833.525500  
 Sum of electronic and thermal Enthalpies= -833.524556  
 Sum of electronic and thermal Free Energies= -833.585160  
 ωB97XD /6-311++G(d,p)-SDD/SMD//ωB97XD /6-31G(d)-LANL2DZ energy in tetrahydrofuran solvent = -834.0183352

**COD**

| Center Number | Atomic Number | Atomic Type | Coordinates (Angstroms) |           |           |
|---------------|---------------|-------------|-------------------------|-----------|-----------|
|               |               |             | X                       | Y         | Z         |
| 1             | 6             | 0           | 1.185621                | 1.245584  | -0.501056 |
| 2             | 6             | 0           | -0.040590               | 1.693928  | -0.224375 |
| 3             | 6             | 0           | -1.095441               | 1.085551  | 0.669446  |
| 4             | 6             | 0           | -1.915647               | -0.020086 | -0.016410 |
| 5             | 6             | 0           | -1.185624               | -1.245540 | -0.501157 |
| 6             | 6             | 0           | 0.040592                | -1.693906 | -0.224529 |
| 7             | 6             | 0           | 1.095443                | -1.085605 | 0.669342  |

|    |   |   |           |           |           |
|----|---|---|-----------|-----------|-----------|
| 8  | 6 | 0 | 1.915646  | 0.020078  | -0.016444 |
| 9  | 1 | 0 | 1.778508  | 1.853202  | -1.185382 |
| 10 | 1 | 0 | -0.344226 | 2.611636  | -0.727405 |
| 11 | 1 | 0 | -1.794923 | 1.875969  | 0.965010  |
| 12 | 1 | 0 | -0.664974 | 0.712772  | 1.601029  |
| 13 | 1 | 0 | -2.718396 | -0.338862 | 0.665018  |
| 14 | 1 | 0 | -2.429271 | 0.420059  | -0.882334 |
| 15 | 1 | 0 | -1.778513 | -1.853092 | -1.185539 |
| 16 | 1 | 0 | 0.344234  | -2.611560 | -0.727653 |
| 17 | 1 | 0 | 1.794922  | -1.876049 | 0.964847  |
| 18 | 1 | 0 | 0.664980  | -0.712888 | 1.600950  |
| 19 | 1 | 0 | 2.718423  | 0.338788  | 0.664982  |
| 20 | 1 | 0 | 2.429235  | -0.419999 | -0.882424 |

-----  
Zero-point correction= 0.183377 (Hartree/Particle)  
Thermal correction to Energy= 0.190717  
Thermal correction to Enthalpy= 0.191661  
Thermal correction to Gibbs Free Energy= 0.151932  
Sum of electronic and zero-point Energies= -311.749877  
Sum of electronic and thermal Energies= -311.742536  
Sum of electronic and thermal Enthalpies= -311.741592  
Sum of electronic and thermal Free Energies= -311.781321  
@B97XD /6-311++G(d,p)-SDD/SMD//@B97XD /6-31G(d)-LANL2DZ energy in tetrahydrofuran solvent = -312.0220746

### Ni(0)(COD)<sub>2</sub>

| Center Number | Atomic Number | Atomic Type | Coordinates (Angstroms) |           |           |
|---------------|---------------|-------------|-------------------------|-----------|-----------|
|               |               |             | X                       | Y         | Z         |
| 1             | 6             | 0           | 1.350070                | -1.531629 | -0.605797 |
| 2             | 6             | 0           | 1.493749                | -0.468158 | -1.471218 |
| 3             | 6             | 0           | 2.594468                | 0.578166  | -1.415075 |
| 4             | 6             | 0           | 2.202404                | 1.829266  | -0.606834 |
| 5             | 6             | 0           | 1.350460                | 1.531209  | 0.606285  |
| 6             | 6             | 0           | 1.494002                | 0.467610  | 1.471450  |
| 7             | 6             | 0           | 2.594575                | -0.578749 | 1.415273  |
| 8             | 6             | 0           | 2.202110                | -1.829843 | 0.607212  |
| 9             | 1             | 0           | 0.741672                | -2.365854 | -0.951085 |
| 10            | 1             | 0           | 0.965470                | -0.539145 | -2.418568 |
| 11            | 1             | 0           | 2.844487                | 0.883095  | -2.437384 |
| 12            | 1             | 0           | 3.507875                | 0.132144  | -1.010075 |
| 13            | 1             | 0           | 3.105599                | 2.388666  | -0.318348 |
| 14            | 1             | 0           | 1.625392                | 2.498082  | -1.256916 |
| 15            | 1             | 0           | 0.741918                | 2.365348  | 0.951491  |
| 16            | 1             | 0           | 0.965268                | 0.538323  | 2.418728  |
| 17            | 1             | 0           | 2.844817                | -0.883404 | 2.437770  |
| 18            | 1             | 0           | 3.507910                | -0.132784 | 1.009932  |
| 19            | 1             | 0           | 3.105150                | -2.389373 | 0.318640  |
| 20            | 1             | 0           | 1.625161                | -2.498490 | 1.257359  |
| 21            | 6             | 0           | -1.350939               | -1.531641 | 0.606617  |
| 22            | 6             | 0           | -1.494280               | -0.468047 | 1.471752  |
| 23            | 6             | 0           | -2.594170               | 0.579093  | 1.415390  |
| 24            | 6             | 0           | -2.201259               | 1.829826  | 0.606856  |
| 25            | 6             | 0           | -1.349265               | 1.531167  | -0.606195 |
| 26            | 6             | 0           | -1.493105               | 0.467387  | -1.471498 |
| 27            | 6             | 0           | -2.594395               | -0.578361 | -1.414952 |
| 28            | 6             | 0           | -2.202256               | -1.829550 | -0.607021 |
| 29            | 1             | 0           | -0.742425               | -2.365817 | 0.951816  |
| 30            | 1             | 0           | -0.965583               | -0.538824 | 2.418886  |
| 31            | 1             | 0           | -2.843886               | 0.884333  | 2.437789  |
| 32            | 1             | 0           | -3.507911               | 0.133643  | 1.010550  |
| 33            | 1             | 0           | -3.104135               | 2.389836  | 0.318410  |
| 34            | 1             | 0           | -1.623841               | 2.498356  | 1.256982  |
| 35            | 1             | 0           | -0.741427               | 2.365574  | -0.952017 |
| 36            | 1             | 0           | -0.965628               | 0.538344  | -2.419117 |
| 37            | 1             | 0           | -2.845114               | -0.883171 | -2.437151 |
| 38            | 1             | 0           | -3.507417               | -0.132080 | -1.009477 |

|    |    |   |           |           |           |
|----|----|---|-----------|-----------|-----------|
| 39 | 1  | 0 | -3.105319 | -2.389593 | -0.319300 |
| 40 | 1  | 0 | -1.624543 | -2.497741 | -1.257204 |
| 41 | 28 | 0 | -0.000589 | 0.000502  | -0.000542 |

-----

Zero-point correction= 0.370756 (Hartree/Particle)  
Thermal correction to Energy= 0.386672  
Thermal correction to Enthalpy= 0.387617  
Thermal correction to Gibbs Free Energy= 0.329870  
Sum of electronic and zero-point Energies= -792.850510  
Sum of electronic and thermal Energies= -792.834594  
Sum of electronic and thermal Enthalpies= -792.833650  
Sum of electronic and thermal Free Energies= -792.891396  
ωB97XD /6-311++G(d,p)-SDD/SMD//ωB97XD /6-31G(d)-LANL2DZ energy in tetrahydrofuran solvent = -795.0322277

**INT1a**

-----

| Center<br>Number | Atomic<br>Number | Atomic<br>Type | Coordinates (Angstroms) |           |           |
|------------------|------------------|----------------|-------------------------|-----------|-----------|
|                  |                  |                | X                       | Y         | Z         |
| 1                | 6                | 0              | -1.448510               | -0.286601 | 1.623121  |
| 2                | 6                | 0              | -0.836444               | 0.810187  | 1.069684  |
| 3                | 6                | 0              | -1.539845               | 1.972190  | 0.398676  |
| 4                | 6                | 0              | -1.693113               | 1.787024  | -1.128207 |
| 5                | 6                | 0              | -1.986550               | 0.367903  | -1.562880 |
| 6                | 6                | 0              | -2.803756               | -0.529848 | -0.927489 |
| 7                | 6                | 0              | -3.646761               | -0.240044 | 0.298467  |
| 8                | 6                | 0              | -2.928729               | -0.597946 | 1.618287  |
| 9                | 1                | 0              | -0.847329               | -0.918305 | 2.274920  |
| 10               | 1                | 0              | 0.220343                | 0.958821  | 1.284526  |
| 11               | 1                | 0              | -0.956754               | 2.881340  | 0.579486  |
| 12               | 1                | 0              | -2.515025               | 2.138523  | 0.864771  |
| 13               | 1                | 0              | -2.462873               | 2.474175  | -1.508728 |
| 14               | 1                | 0              | -0.754077               | 2.083178  | -1.609569 |
| 15               | 1                | 0              | -1.619722               | 0.100367  | -2.551471 |
| 16               | 1                | 0              | -3.003096               | -1.470248 | -1.437673 |
| 17               | 1                | 0              | -4.574185               | -0.819623 | 0.237518  |
| 18               | 1                | 0              | -3.950895               | 0.810222  | 0.300179  |
| 19               | 1                | 0              | -3.429206               | -0.098266 | 2.460664  |
| 20               | 1                | 0              | -3.036830               | -1.674131 | 1.793624  |
| 21               | 28               | 0              | -0.758021               | -0.813290 | -0.301127 |
| 22               | 6                | 0              | 0.831996                | -1.782072 | -0.149452 |
| 23               | 6                | 0              | 0.338105                | -1.955124 | -1.314427 |
| 24               | 1                | 0              | 0.442959                | -2.420727 | -2.282691 |
| 25               | 6                | 0              | 1.902081                | -1.947217 | 0.867946  |
| 26               | 1                | 0              | 1.835511                | -1.127705 | 1.599077  |
| 27               | 1                | 0              | 1.746470                | -2.885828 | 1.409253  |
| 28               | 8                | 0              | 3.214883                | -2.026140 | 0.346787  |
| 29               | 6                | 0              | 3.572405                | -0.931986 | -0.477892 |
| 30               | 1                | 0              | 2.984488                | -0.942504 | -1.406477 |
| 31               | 1                | 0              | 4.621938                | -1.109578 | -0.734715 |
| 32               | 6                | 0              | 3.415532                | 0.399285  | 0.201645  |
| 33               | 6                | 0              | 2.600330                | 1.362250  | -0.243318 |
| 34               | 1                | 0              | 3.992325                | 0.552101  | 1.114581  |
| 35               | 1                | 0              | 2.007719                | 1.180723  | -1.140962 |
| 36               | 6                | 0              | 2.430485                | 2.659382  | 0.405204  |
| 37               | 6                | 0              | 1.653872                | 3.636941  | -0.072244 |
| 38               | 1                | 0              | 2.980768                | 2.815794  | 1.332761  |
| 39               | 1                | 0              | 1.552819                | 4.589264  | 0.438599  |
| 40               | 1                | 0              | 1.103580                | 3.517704  | -1.003124 |

-----

Zero-point correction= 0.346705 (Hartree/Particle)  
Thermal correction to Energy= 0.365548  
Thermal correction to Enthalpy= 0.366492  
Thermal correction to Gibbs Free Energy= 0.299967  
Sum of electronic and zero-point Energies= -866.770351  
Sum of electronic and thermal Energies= -866.751508  
Sum of electronic and thermal Enthalpies= -866.750564

Sum of electronic and thermal Free Energies= -866.817089  
 ωB97XD /6-311++G(d,p)-SDD/SMD//ωB97XD /6-31G(d)-LANL2DZ energy in tetrahydrofuran solvent = -868.964955

**INT2a**

| Center Number | Atomic Number | Atomic Type | Coordinates (Angstroms) |           |           |
|---------------|---------------|-------------|-------------------------|-----------|-----------|
|               |               |             | X                       | Y         | Z         |
| 1             | 6             | 0           | 1.250617                | 1.416969  | -1.521219 |
| 2             | 6             | 0           | -0.044553               | 1.052056  | -1.883430 |
| 3             | 6             | 0           | -1.314298               | 1.868789  | -1.668947 |
| 4             | 6             | 0           | -1.932416               | 1.856756  | -0.259708 |
| 5             | 6             | 0           | -1.056110               | 2.152645  | 0.930426  |
| 6             | 6             | 0           | 0.059223                | 2.883018  | 1.002922  |
| 7             | 6             | 0           | 0.740180                | 3.595466  | -0.135198 |
| 8             | 6             | 0           | 1.732800                | 2.732707  | -0.939377 |
| 9             | 1             | 0           | 2.038318                | 0.922067  | -2.094702 |
| 10            | 1             | 0           | -0.114641               | 0.339965  | -2.704166 |
| 11            | 1             | 0           | -2.082308               | 1.475186  | -2.345625 |
| 12            | 1             | 0           | -1.144836               | 2.897264  | -2.005032 |
| 13            | 1             | 0           | -2.790733               | 2.545017  | -0.246855 |
| 14            | 1             | 0           | -2.359657               | 0.863226  | -0.093850 |
| 15            | 1             | 0           | -1.413707               | 1.702828  | 1.856746  |
| 16            | 1             | 0           | 0.547303                | 2.959991  | 1.975139  |
| 17            | 1             | 0           | 1.299021                | 4.450227  | 0.264528  |
| 18            | 1             | 0           | -0.004029               | 4.022052  | -0.811447 |
| 19            | 1             | 0           | 2.103213                | 3.349492  | -1.772096 |
| 20            | 1             | 0           | 2.620865                | 2.544331  | -0.319503 |
| 21            | 6             | 0           | -0.859946               | -1.379475 | -0.595518 |
| 22            | 6             | 0           | -0.306978               | -1.588889 | 0.520129  |
| 23            | 1             | 0           | -0.241127               | -2.149694 | 1.441658  |
| 24            | 6             | 0           | -1.876307               | -1.633935 | -1.641870 |
| 25            | 1             | 0           | -2.506497               | -0.737401 | -1.743377 |
| 26            | 1             | 0           | -1.384784               | -1.797008 | -2.605803 |
| 27            | 8             | 0           | -2.676863               | -2.780376 | -1.434114 |
| 28            | 6             | 0           | -3.413908               | -2.770247 | -0.225207 |
| 29            | 1             | 0           | -2.737465               | -2.776343 | 0.640428  |
| 30            | 1             | 0           | -3.966237               | -3.715739 | -0.231045 |
| 31            | 6             | 0           | -4.361353               | -1.609018 | -0.122364 |
| 32            | 6             | 0           | -4.283866               | -0.674788 | 0.831968  |
| 33            | 1             | 0           | -5.127809               | -1.537056 | -0.894632 |
| 34            | 1             | 0           | -3.492446               | -0.747040 | 1.579966  |
| 35            | 6             | 0           | -5.179167               | 0.473621  | 0.936416  |
| 36            | 6             | 0           | -5.057571               | 1.429245  | 1.862111  |
| 37            | 1             | 0           | -5.976384               | 0.537918  | 0.196481  |
| 38            | 1             | 0           | -5.736759               | 2.274943  | 1.901680  |
| 39            | 1             | 0           | -4.270759               | 1.395125  | 2.612380  |
| 40            | 28            | 0           | 0.566258                | -0.092214 | -0.301973 |
| 41            | 6             | 0           | 2.181370                | 0.100200  | 1.004946  |
| 42            | 7             | 0           | 1.775300                | -0.412005 | 2.167748  |
| 43            | 7             | 0           | 1.425292                | -0.905252 | 3.116876  |
| 44            | 1             | 0           | 2.340941                | 1.170121  | 1.135575  |
| 45            | 14            | 0           | 3.562396                | -0.895655 | 0.137486  |
| 46            | 6             | 0           | 4.448014                | -1.906637 | 1.460988  |
| 47            | 1             | 0           | 3.778496                | -2.639005 | 1.927666  |
| 48            | 1             | 0           | 5.280803                | -2.465026 | 1.017886  |
| 49            | 1             | 0           | 4.855236                | -1.270025 | 2.254668  |
| 50            | 6             | 0           | 2.944264                | -2.067579 | -1.191882 |
| 51            | 1             | 0           | 2.484051                | -1.531371 | -2.027358 |
| 52            | 1             | 0           | 3.781786                | -2.662298 | -1.579130 |
| 53            | 1             | 0           | 2.188451                | -2.751559 | -0.792792 |
| 54            | 6             | 0           | 4.727055                | 0.393229  | -0.584217 |
| 55            | 1             | 0           | 4.237423                | 0.998744  | -1.353908 |
| 56            | 1             | 0           | 5.104473                | 1.070670  | 0.189861  |
| 57            | 1             | 0           | 5.589490                | -0.099420 | -1.048162 |

Zero-point correction= 0.485326 (Hartree/Particle)

Thermal correction to Energy= 0.516260  
 Thermal correction to Enthalpy= 0.517204  
 Thermal correction to Gibbs Free Energy= 0.422680  
 Sum of electronic and zero-point Energies= -1423.947430  
 Sum of electronic and thermal Energies= -1423.916496  
 Sum of electronic and thermal Enthalpies= -1423.915552  
 Sum of electronic and thermal Free Energies= -1424.010076  
 ωB97XD /6-311++G(d,p)-SDD/SMD//ωB97XD /6-31G(d)-LANL2DZ energy in tetrahydrofuran solvent = -1426.383797

### TS1a

| Center<br>Number | Atomic<br>Number | Atomic<br>Type | Coordinates (Angstroms) |           |           |
|------------------|------------------|----------------|-------------------------|-----------|-----------|
|                  |                  |                | X                       | Y         | Z         |
| 1                | 6                | 0              | 1.243152                | 1.458856  | -1.393361 |
| 2                | 6                | 0              | -0.044983               | 1.092597  | -1.796157 |
| 3                | 6                | 0              | -1.321838               | 1.898950  | -1.583086 |
| 4                | 6                | 0              | -1.972102               | 1.858957  | -0.188481 |
| 5                | 6                | 0              | -1.123502               | 2.123789  | 1.028744  |
| 6                | 6                | 0              | -0.010724               | 2.850740  | 1.143510  |
| 7                | 6                | 0              | 0.686387                | 3.596813  | 0.038544  |
| 8                | 6                | 0              | 1.703145                | 2.762244  | -0.763464 |
| 9                | 1                | 0              | 2.038072                | 1.003599  | -1.986454 |
| 10               | 1                | 0              | -0.084883               | 0.428540  | -2.657916 |
| 11               | 1                | 0              | -2.074266               | 1.519294  | -2.284709 |
| 12               | 1                | 0              | -1.147868               | 2.934707  | -1.893873 |
| 13               | 1                | 0              | -2.828780               | 2.549282  | -0.183432 |
| 14               | 1                | 0              | -2.407376               | 0.864163  | -0.054194 |
| 15               | 1                | 0              | -1.495609               | 1.642714  | 1.933292  |
| 16               | 1                | 0              | 0.465801                | 2.892256  | 2.122831  |
| 17               | 1                | 0              | 1.230823                | 4.445256  | 0.470416  |
| 18               | 1                | 0              | -0.047253               | 4.034814  | -0.642077 |
| 19               | 1                | 0              | 2.081670                | 3.399695  | -1.576564 |
| 20               | 1                | 0              | 2.576753                | 2.563610  | -0.129308 |
| 21               | 6                | 0              | -0.933239               | -1.345904 | -0.643068 |
| 22               | 6                | 0              | -0.363327               | -1.638186 | 0.443051  |
| 23               | 1                | 0              | -0.257722               | -2.251108 | 1.327416  |
| 24               | 6                | 0              | -1.959935               | -1.544861 | -1.690561 |
| 25               | 1                | 0              | -2.587026               | -0.643097 | -1.748808 |
| 26               | 1                | 0              | -1.475031               | -1.667900 | -2.663783 |
| 27               | 8                | 0              | -2.763742               | -2.696080 | -1.527500 |
| 28               | 6                | 0              | -3.503431               | -2.727947 | -0.320427 |
| 29               | 1                | 0              | -2.828598               | -2.754934 | 0.546267  |
| 30               | 1                | 0              | -4.048728               | -3.676739 | -0.355845 |
| 31               | 6                | 0              | -4.458262               | -1.575926 | -0.187027 |
| 32               | 6                | 0              | -4.381893               | -0.660874 | 0.785812  |
| 33               | 1                | 0              | -5.226387               | -1.490414 | -0.956238 |
| 34               | 1                | 0              | -3.589354               | -0.745776 | 1.531420  |
| 35               | 6                | 0              | -5.279978               | 0.482877  | 0.914167  |
| 36               | 6                | 0              | -5.155916               | 1.423950  | 1.854289  |
| 37               | 1                | 0              | -6.081025               | 0.557081  | 0.179307  |
| 38               | 1                | 0              | -5.837083               | 2.267098  | 1.910564  |
| 39               | 1                | 0              | -4.364748               | 1.380772  | 2.599501  |
| 40               | 28               | 0              | 0.559781                | -0.122821 | -0.255160 |
| 41               | 6                | 0              | 2.109406                | 0.053746  | 0.768477  |
| 42               | 7                | 0              | 1.900737                | -0.911633 | 2.304243  |
| 43               | 7                | 0              | 1.496022                | -1.704281 | 2.964787  |
| 44               | 1                | 0              | 2.295595                | 0.975651  | 1.332716  |
| 45               | 14               | 0              | 3.698694                | -0.746371 | 0.055294  |
| 46               | 6                | 0              | 4.743930                | -1.592117 | 1.382522  |
| 47               | 1                | 0              | 4.235316                | -2.457879 | 1.820907  |
| 48               | 1                | 0              | 5.680861                | -1.953933 | 0.942459  |
| 49               | 1                | 0              | 5.002127                | -0.902557 | 2.194367  |
| 50               | 6                | 0              | 3.207065                | -2.008311 | -1.247190 |
| 51               | 1                | 0              | 2.693106                | -1.525272 | -2.085378 |
| 52               | 1                | 0              | 4.080703                | -2.542050 | -1.639857 |
| 53               | 1                | 0              | 2.511118                | -2.743411 | -0.827614 |

|    |   |   |          |          |           |
|----|---|---|----------|----------|-----------|
| 54 | 6 | 0 | 4.730981 | 0.640124 | -0.702501 |
| 55 | 1 | 0 | 4.205757 | 1.165777 | -1.505914 |
| 56 | 1 | 0 | 5.020068 | 1.380364 | 0.052142  |
| 57 | 1 | 0 | 5.651402 | 0.221511 | -1.127243 |

-----  
Zero-point correction= 0.482668 (Hartree/Particle)  
Thermal correction to Energy= 0.513751  
Thermal correction to Enthalpy= 0.514695  
Thermal correction to Gibbs Free Energy= 0.419985  
Sum of electronic and zero-point Energies= -1423.919761  
Sum of electronic and thermal Energies= -1423.888678  
Sum of electronic and thermal Enthalpies= -1423.887734  
Sum of electronic and thermal Free Energies= -1423.982444  
ωB97XD /6-311++G(d,p)-SDD/SMD//ωB97XD /6-31G(d)-LANL2DZ energy in tetrahydrofuran solvent = -1426.3563317

### INT3a

-----

| Center<br>Number | Atomic<br>Number | Atomic<br>Type | Coordinates (Angstroms) |           |           |
|------------------|------------------|----------------|-------------------------|-----------|-----------|
|                  |                  |                | X                       | Y         | Z         |
| 1                | 6                | 0              | 1.460837                | 1.169865  | -1.407839 |
| 2                | 6                | 0              | 0.183692                | 0.829472  | -1.872101 |
| 3                | 6                | 0              | -1.049140               | 1.726630  | -1.848394 |
| 4                | 6                | 0              | -1.799915               | 1.892262  | -0.512599 |
| 5                | 6                | 0              | -1.027868               | 2.238908  | 0.734708  |
| 6                | 6                | 0              | 0.118427                | 2.908792  | 0.859996  |
| 7                | 6                | 0              | 0.940804                | 3.482313  | -0.260950 |
| 8                | 6                | 0              | 1.958685                | 2.501182  | -0.869175 |
| 9                | 1                | 0              | 2.273516                | 0.598384  | -1.858587 |
| 10               | 1                | 0              | 0.172132                | 0.080592  | -2.661528 |
| 11               | 1                | 0              | -1.772358               | 1.308745  | -2.558908 |
| 12               | 1                | 0              | -0.786859               | 2.706359  | -2.261956 |
| 13               | 1                | 0              | -2.596723               | 2.637683  | -0.655645 |
| 14               | 1                | 0              | -2.319984               | 0.952992  | -0.300946 |
| 15               | 1                | 0              | -1.499522               | 1.882283  | 1.649307  |
| 16               | 1                | 0              | 0.527634                | 3.028926  | 1.862677  |
| 17               | 1                | 0              | 1.506277                | 4.343636  | 0.114208  |
| 18               | 1                | 0              | 0.291380                | 3.875261  | -1.046483 |
| 19               | 1                | 0              | 2.449555                | 3.013551  | -1.710476 |
| 20               | 1                | 0              | 2.751141                | 2.310506  | -0.136126 |
| 21               | 6                | 0              | -0.930320               | -1.426368 | -0.544095 |
| 22               | 6                | 0              | -0.385090               | -1.740464 | 0.548691  |
| 23               | 1                | 0              | -0.282781               | -2.337955 | 1.436015  |
| 24               | 6                | 0              | -1.970420               | -1.617389 | -1.581168 |
| 25               | 1                | 0              | -2.534036               | -0.679961 | -1.690010 |
| 26               | 1                | 0              | -1.492418               | -1.821230 | -2.544258 |
| 27               | 8                | 0              | -2.853950               | -2.698078 | -1.365953 |
| 28               | 6                | 0              | -3.538067               | -2.664653 | -0.126265 |
| 29               | 1                | 0              | -2.837845               | -2.835523 | 0.703160  |
| 30               | 1                | 0              | -4.226472               | -3.514997 | -0.168637 |
| 31               | 6                | 0              | -4.292607               | -1.386520 | 0.106760  |
| 32               | 6                | 0              | -4.027048               | -0.551715 | 1.117819  |
| 33               | 1                | 0              | -5.073845               | -1.141019 | -0.613251 |
| 34               | 1                | 0              | -3.220285               | -0.800123 | 1.808838  |
| 35               | 6                | 0              | -4.724999               | 0.707982  | 1.356538  |
| 36               | 6                | 0              | -4.435050               | 1.535864  | 2.364347  |
| 37               | 1                | 0              | -5.513293               | 0.970737  | 0.651816  |
| 38               | 1                | 0              | -4.963199               | 2.473323  | 2.505407  |
| 39               | 1                | 0              | -3.655986               | 1.297591  | 3.085132  |
| 40               | 28               | 0              | 0.620154                | -0.268722 | -0.175410 |
| 41               | 6                | 0              | 2.000330                | -0.076081 | 0.903445  |
| 42               | 1                | 0              | 1.969035                | 0.646841  | 1.734483  |
| 43               | 14               | 0              | 3.648796                | -0.951468 | 0.656252  |
| 44               | 6                | 0              | 4.122572                | -1.825862 | 2.263108  |
| 45               | 1                | 0              | 3.365198                | -2.562885 | 2.552146  |
| 46               | 1                | 0              | 5.075703                | -2.355460 | 2.148082  |
| 47               | 1                | 0              | 4.230724                | -1.111581 | 3.086908  |

|    |   |   |          |           |           |
|----|---|---|----------|-----------|-----------|
| 48 | 6 | 0 | 3.508081 | -2.205930 | -0.739573 |
| 49 | 1 | 0 | 3.248348 | -1.713342 | -1.683674 |
| 50 | 1 | 0 | 4.446398 | -2.752593 | -0.890683 |
| 51 | 1 | 0 | 2.715960 | -2.931071 | -0.522864 |
| 52 | 6 | 0 | 4.958796 | 0.341491  | 0.215731  |
| 53 | 1 | 0 | 4.717550 | 0.847631  | -0.726051 |
| 54 | 1 | 0 | 5.048810 | 1.105922  | 0.995671  |
| 55 | 1 | 0 | 5.940171 | -0.132505 | 0.093890  |

-----  
Zero-point correction= 0.474998 (Hartree/Particle)  
Thermal correction to Energy= 0.504014  
Thermal correction to Enthalpy= 0.504959  
Thermal correction to Gibbs Free Energy= 0.414405  
Sum of electronic and zero-point Energies= -1314.462190  
Sum of electronic and thermal Energies= -1314.433174  
Sum of electronic and thermal Enthalpies= -1314.432229  
Sum of electronic and thermal Free Energies= -1314.522783  
ωB97XD /6-311++G(d,p)-SDD/SMD//ωB97XD /6-31G(d)-LANL2DZ energy in tetrahydrofuran solvent = -1316.8630004

#### INT4a

-----

| Center<br>Number | Atomic<br>Number | Atomic<br>Type | Coordinates (Angstroms) |           |           |
|------------------|------------------|----------------|-------------------------|-----------|-----------|
|                  |                  |                | X                       | Y         | Z         |
| 1                | 6                | 0              | -0.432590               | 1.331743  | -1.855417 |
| 2                | 6                | 0              | -1.473269               | 1.320379  | -0.976797 |
| 3                | 6                | 0              | -1.910121               | 2.465496  | -0.092719 |
| 4                | 6                | 0              | -1.277503               | 2.387315  | 1.308597  |
| 5                | 6                | 0              | 0.185922                | 2.015788  | 1.314218  |
| 6                | 6                | 0              | 1.137166                | 2.353732  | 0.397980  |
| 7                | 6                | 0              | 0.956027                | 3.235378  | -0.818870 |
| 8                | 6                | 0              | 0.556319                | 2.448350  | -2.087185 |
| 9                | 1                | 0              | -0.354200               | 0.499927  | -2.551322 |
| 10               | 1                | 0              | -2.139652               | 0.460982  | -0.990617 |
| 11               | 1                | 0              | -2.997245               | 2.415877  | 0.020907  |
| 12               | 1                | 0              | -1.688803               | 3.423429  | -0.569010 |
| 13               | 1                | 0              | -1.426747               | 3.336677  | 1.842510  |
| 14               | 1                | 0              | -1.812656               | 1.624287  | 1.885686  |
| 15               | 1                | 0              | 0.534221                | 1.524561  | 2.220383  |
| 16               | 1                | 0              | 2.162178                | 2.083322  | 0.634589  |
| 17               | 1                | 0              | 1.902569                | 3.747943  | -1.019134 |
| 18               | 1                | 0              | 0.226347                | 4.020694  | -0.607217 |
| 19               | 1                | 0              | 0.165996                | 3.145116  | -2.842368 |
| 20               | 1                | 0              | 1.455889                | 1.999273  | -2.520423 |
| 21               | 6                | 0              | 0.072160                | -1.472499 | -0.589017 |
| 22               | 6                | 0              | 0.694307                | -1.984399 | 0.475898  |
| 23               | 1                | 0              | 0.640731                | -2.998057 | 0.891217  |
| 24               | 6                | 0              | -0.882883               | -2.132267 | -1.532286 |
| 25               | 1                | 0              | -1.645288               | -1.414335 | -1.874639 |
| 26               | 1                | 0              | -0.346406               | -2.466086 | -2.428116 |
| 27               | 8                | 0              | -1.525629               | -3.307430 | -1.051324 |
| 28               | 6                | 0              | -2.333029               | -3.112599 | 0.089087  |
| 29               | 1                | 0              | -1.726630               | -2.845794 | 0.965308  |
| 30               | 1                | 0              | -2.790117               | -4.090919 | 0.277595  |
| 31               | 6                | 0              | -3.407625               | -2.078893 | -0.099377 |
| 32               | 6                | 0              | -3.599319               | -1.054373 | 0.739678  |
| 33               | 1                | 0              | -4.057976               | -2.204039 | -0.966248 |
| 34               | 1                | 0              | -2.926519               | -0.936399 | 1.590838  |
| 35               | 6                | 0              | -4.661034               | -0.061846 | 0.599632  |
| 36               | 6                | 0              | -4.877457               | 0.930552  | 1.469181  |
| 37               | 1                | 0              | -5.306709               | -0.160602 | -0.272809 |
| 38               | 1                | 0              | -5.680836               | 1.647258  | 1.330976  |
| 39               | 1                | 0              | -4.261714               | 1.048839  | 2.358419  |
| 40               | 28               | 0              | 0.325874                | 0.336232  | -0.058607 |
| 41               | 6                | 0              | 1.479173                | -0.839827 | 1.032414  |
| 42               | 1                | 0              | 1.360909                | -0.676146 | 2.114732  |
| 43               | 14               | 0              | 3.263566                | -0.757283 | 0.476687  |



|    |   |   |          |           |           |
|----|---|---|----------|-----------|-----------|
| 44 | 6 | 0 | 4.023658 | -2.489716 | 0.466687  |
| 45 | 1 | 0 | 3.491586 | -3.136359 | -0.240736 |
| 46 | 1 | 0 | 5.080648 | -2.468015 | 0.175419  |
| 47 | 1 | 0 | 3.955823 | -2.956914 | 1.456232  |
| 48 | 6 | 0 | 3.444682 | -0.048241 | -1.268352 |
| 49 | 1 | 0 | 3.246045 | 1.030040  | -1.287035 |
| 50 | 1 | 0 | 4.453897 | -0.210479 | -1.665863 |
| 51 | 1 | 0 | 2.726359 | -0.532770 | -1.939723 |
| 52 | 6 | 0 | 4.260043 | 0.310804  | 1.685465  |
| 53 | 1 | 0 | 3.841835 | 1.317401  | 1.807707  |
| 54 | 1 | 0 | 4.281588 | -0.154818 | 2.677997  |
| 55 | 1 | 0 | 5.297749 | 0.423751  | 1.349802  |

-----  
Zero-point correction= 0.478107 (Hartree/Particle)  
Thermal correction to Energy= 0.506039  
Thermal correction to Enthalpy= 0.506984  
Thermal correction to Gibbs Free Energy= 0.420279  
Sum of electronic and zero-point Energies= -1314.547855  
Sum of electronic and thermal Energies= -1314.519922  
Sum of electronic and thermal Enthalpies= -1314.518978  
Sum of electronic and thermal Free Energies= -1314.605683  
 $\omega$ B97XD /6-311++G(d,p)-SDD/SMD// $\omega$ B97XD /6-31G(d)-LANL2DZ energy in tetrahydrofuran solvent = -1316.9453197

### TS1a'

| Center<br>Number | Atomic<br>Number | Atomic<br>Type | Coordinates (Angstroms) |           |           |
|------------------|------------------|----------------|-------------------------|-----------|-----------|
|                  |                  |                | X                       | Y         | Z         |
| 1                | 28               | 0              | 0.558914                | -1.124719 | -0.110722 |
| 2                | 6                | 0              | 1.393849                | 0.661743  | -1.294117 |
| 3                | 6                | 0              | 1.038598                | -0.377668 | -1.931896 |
| 4                | 1                | 0              | 0.511753                | -0.657032 | -2.829763 |
| 5                | 6                | 0              | 1.179416                | 2.119206  | -1.016677 |
| 6                | 1                | 0              | 1.638666                | 2.689144  | -1.843364 |
| 7                | 1                | 0              | 0.112074                | 2.353037  | -0.982333 |
| 8                | 8                | 0              | 1.718890                | 2.510096  | 0.216136  |
| 9                | 6                | 0              | 3.043089                | 1.995531  | 0.334958  |
| 10               | 1                | 0              | 3.327161                | 2.161520  | 1.377397  |
| 11               | 1                | 0              | 3.723629                | 2.571684  | -0.309820 |
| 12               | 6                | 0              | 3.050333                | 0.541022  | -0.052532 |
| 13               | 6                | 0              | 2.561268                | -0.428223 | 0.823143  |
| 14               | 1                | 0              | 3.730942                | 0.227737  | -0.838512 |
| 15               | 1                | 0              | 2.097356                | -0.098158 | 1.754719  |
| 16               | 6                | 0              | 2.391042                | -1.783666 | 0.429759  |
| 17               | 6                | 0              | 1.369693                | -2.566537 | 1.015522  |
| 18               | 1                | 0              | 2.944799                | -2.153978 | -0.428138 |
| 19               | 1                | 0              | 1.224302                | -3.588605 | 0.672979  |
| 20               | 1                | 0              | 1.070599                | -2.381041 | 2.046405  |
| 21               | 6                | 0              | -1.137520               | -0.746540 | 1.034173  |
| 22               | 6                | 0              | -1.505924               | -1.211578 | -0.214335 |
| 23               | 6                | 0              | -2.111488               | -0.414921 | -1.345352 |
| 24               | 6                | 0              | -3.638479               | -0.260785 | -1.202688 |
| 25               | 6                | 0              | -4.177293               | 0.312714  | 0.086059  |
| 26               | 6                | 0              | -3.583828               | 1.103366  | 0.983240  |
| 27               | 6                | 0              | -2.178111               | 1.644901  | 0.940723  |
| 28               | 6                | 0              | -1.120830               | 0.689058  | 1.534289  |
| 29               | 1                | 0              | -1.076127               | -1.495206 | 1.820308  |
| 30               | 1                | 0              | -1.679207               | -2.286965 | -0.285580 |
| 31               | 1                | 0              | -1.920660               | -0.942747 | -2.287236 |
| 32               | 1                | 0              | -1.625669               | 0.556247  | -1.451415 |
| 33               | 1                | 0              | -4.011744               | 0.337784  | -2.047075 |
| 34               | 1                | 0              | -4.091461               | -1.253261 | -1.331382 |
| 35               | 1                | 0              | -5.210106               | 0.031014  | 0.291106  |
| 36               | 1                | 0              | -4.167007               | 1.380489  | 1.861015  |
| 37               | 1                | 0              | -2.134640               | 2.577756  | 1.514582  |
| 38               | 1                | 0              | -1.907727               | 1.918206  | -0.081583 |
| 39               | 1                | 0              | -0.133616               | 1.146771  | 1.382430  |

40 1 0 -1.266921 0.651225 2.620801

-----  
Zero-point correction= 0.160826 (Hartree/Particle)  
Thermal correction to Energy= 0.169860  
Thermal correction to Enthalpy= 0.170804  
Thermal correction to Gibbs Free Energy= 0.126461  
Sum of electronic and zero-point Energies= -554.943198  
Sum of electronic and thermal Energies= -554.934164  
Sum of electronic and thermal Enthalpies= -554.933219  
Sum of electronic and thermal Free Energies= -554.977562  
ωB97XD /6-311++G(d,p)-SDD/SMD//ωB97XD /6-31G(d)-LANL2DZ energy in tetrahydrofuran solvent = -868.9072278

### INT3a'

| Center Number | Atomic Number | Atomic Type | Coordinates (Angstroms) |           |           |
|---------------|---------------|-------------|-------------------------|-----------|-----------|
|               |               |             | X                       | Y         | Z         |
| 1             | 6             | 0           | 1.969292                | -0.167023 | 0.145980  |
| 2             | 6             | 0           | 0.831035                | 0.570400  | 0.682100  |
| 3             | 1             | 0           | 1.188475                | 1.405782  | 1.305465  |
| 4             | 6             | 0           | 1.724531                | -1.421878 | -0.680876 |
| 5             | 1             | 0           | 0.888211                | -1.976326 | -0.226263 |
| 6             | 1             | 0           | 1.490209                | -1.221853 | -1.731387 |
| 7             | 8             | 0           | 2.924404                | -2.178001 | -0.648441 |
| 8             | 6             | 0           | 3.547222                | -1.942370 | 0.601770  |
| 9             | 1             | 0           | 4.616097                | -2.140847 | 0.475184  |
| 10            | 1             | 0           | 3.150491                | -2.614141 | 1.379646  |
| 11            | 6             | 0           | 3.225529                | -0.502733 | 0.950425  |
| 12            | 6             | 0           | 3.342660                | 0.480657  | -0.165531 |
| 13            | 1             | 0           | 3.318659                | -0.166515 | 1.978678  |
| 14            | 1             | 0           | 3.797405                | 0.103876  | -1.081206 |
| 15            | 6             | 0           | 3.600926                | 1.909810  | 0.105628  |
| 16            | 6             | 0           | 4.273326                | 2.711516  | -0.718912 |
| 17            | 1             | 0           | 3.226592                | 2.310469  | 1.046674  |
| 18            | 1             | 0           | 4.451722                | 3.754807  | -0.477776 |
| 19            | 1             | 0           | 4.671697                | 2.350131  | -1.664333 |
| 20            | 6             | 0           | -2.317803               | 1.529527  | -0.753586 |
| 21            | 6             | 0           | -1.903201               | 0.466411  | -1.509361 |
| 22            | 6             | 0           | -2.655891               | -0.834136 | -1.695888 |
| 23            | 6             | 0           | -2.293627               | -1.912721 | -0.642519 |
| 24            | 6             | 0           | -2.049216               | -1.382522 | 0.752486  |
| 25            | 6             | 0           | -2.745878               | -0.376028 | 1.367381  |
| 26            | 6             | 0           | -3.959946               | 0.333183  | 0.808006  |
| 27            | 6             | 0           | -3.588356               | 1.630733  | 0.058889  |
| 28            | 1             | 0           | -1.757611               | 2.457585  | -0.860708 |
| 29            | 1             | 0           | -1.034141               | 0.616608  | -2.145828 |
| 30            | 1             | 0           | -2.428691               | -1.236697 | -2.688404 |
| 31            | 1             | 0           | -3.732350               | -0.642903 | -1.689076 |
| 32            | 1             | 0           | -3.081923               | -2.678597 | -0.625093 |
| 33            | 1             | 0           | -1.379323               | -2.422842 | -0.964443 |
| 34            | 1             | 0           | -1.356174               | -1.963594 | 1.356544  |
| 35            | 1             | 0           | -2.515245               | -0.181945 | 2.414102  |
| 36            | 1             | 0           | -4.636289               | 0.587212  | 1.631412  |
| 37            | 1             | 0           | -4.524131               | -0.340564 | 0.157299  |
| 38            | 1             | 0           | -4.426843               | 1.951946  | -0.576277 |
| 39            | 1             | 0           | -3.442429               | 2.428161  | 0.796459  |
| 40            | 28            | 0           | -0.924402               | 0.374546  | 0.412176  |

-----  
Zero-point correction= 0.727161 (Hartree/Particle)  
Thermal correction to Energy= 0.777482  
Thermal correction to Enthalpy= 0.778426  
Thermal correction to Gibbs Free Energy= 0.641933  
Sum of electronic and zero-point Energies= -3770.251861  
Sum of electronic and thermal Energies= -3770.201540  
Sum of electronic and thermal Enthalpies= -3770.200596  
Sum of electronic and thermal Free Energies= -3770.337089

ω B97XD /6-311++G(2d,p)-SDD/SMD//ω B97XD /6-31G(d)-LANL2DZ energy in chlorobenzene solvent = -3773.2743528

### TS1a''

| Center Number | Atomic Number | Atomic Type | Coordinates (Angstroms) |           |           |
|---------------|---------------|-------------|-------------------------|-----------|-----------|
|               |               |             | X                       | Y         | Z         |
| 1             | 6             | 0           | -1.571195               | -0.872434 | -0.595246 |
| 2             | 6             | 0           | -0.727638               | -0.925647 | -1.627119 |
| 3             | 1             | 0           | -0.803189               | -0.510539 | -2.627663 |
| 4             | 6             | 0           | -1.886542               | -1.822734 | 0.569803  |
| 5             | 1             | 0           | -1.898687               | -2.838082 | 0.148261  |
| 6             | 1             | 0           | -1.177175               | -1.804218 | 1.400347  |
| 7             | 8             | 0           | -3.147560               | -1.482698 | 1.105047  |
| 8             | 6             | 0           | -3.899757               | -0.881099 | 0.074883  |
| 9             | 1             | 0           | -4.762226               | -0.397030 | 0.538605  |
| 10            | 1             | 0           | -4.251390               | -1.629183 | -0.652835 |
| 11            | 6             | 0           | -2.945087               | 0.097762  | -0.599468 |
| 12            | 6             | 0           | -2.469143               | 1.172105  | 0.200601  |
| 13            | 1             | 0           | -3.176701               | 0.335419  | -1.637888 |
| 14            | 1             | 0           | -2.507129               | 1.059873  | 1.282504  |
| 15            | 6             | 0           | -1.853157               | 2.332266  | -0.353947 |
| 16            | 6             | 0           | -1.375006               | 3.384798  | 0.345029  |
| 17            | 1             | 0           | -1.773036               | 2.358024  | -1.441923 |
| 18            | 1             | 0           | -0.947790               | 4.249717  | -0.151905 |
| 19            | 1             | 0           | -1.441722               | 3.422497  | 1.430128  |
| 20            | 6             | 0           | 2.316030                | -1.017138 | -1.121390 |
| 21            | 6             | 0           | 2.178864                | 0.332575  | -1.370265 |
| 22            | 6             | 0           | 2.789332                | 1.443267  | -0.541087 |
| 23            | 6             | 0           | 1.873812                | 1.928504  | 0.610138  |
| 24            | 6             | 0           | 1.055807                | 0.840640  | 1.269315  |
| 25            | 6             | 0           | 1.490654                | -0.413601 | 1.598594  |
| 26            | 6             | 0           | 2.893467                | -0.941522 | 1.387142  |
| 27            | 6             | 0           | 3.058432                | -1.661153 | 0.029865  |
| 28            | 1             | 0           | 2.034944                | -1.698925 | -1.920705 |
| 29            | 1             | 0           | 1.769598                | 0.618756  | -2.336856 |
| 30            | 1             | 0           | 3.004840                | 2.296722  | -1.192252 |
| 31            | 1             | 0           | 3.755138                | 1.114301  | -0.145952 |
| 32            | 1             | 0           | 2.481035                | 2.451942  | 1.363435  |
| 33            | 1             | 0           | 1.164736                | 2.660688  | 0.213252  |
| 34            | 1             | 0           | 0.082129                | 1.152636  | 1.642454  |
| 35            | 1             | 0           | 0.829723                | -1.033273 | 2.203294  |
| 36            | 1             | 0           | 3.136675                | -1.647990 | 2.187736  |
| 37            | 1             | 0           | 3.614167                | -0.124104 | 1.477756  |
| 38            | 1             | 0           | 4.127175                | -1.756598 | -0.211659 |
| 39            | 1             | 0           | 2.674899                | -2.682917 | 0.128501  |
| 40            | 28            | 0           | 0.488258                | -0.418417 | -0.349932 |

Zero-point correction= 0.344231 (Hartree/Particle)

Thermal correction to Energy= 0.362283

Thermal correction to Enthalpy= 0.363228

Thermal correction to Gibbs Free Energy= 0.298902

Sum of electronic and zero-point Energies= -866.705862

Sum of electronic and thermal Energies= -866.687810

Sum of electronic and thermal Enthalpies= -866.686866

Sum of electronic and thermal Free Energies= -866.751192

ω B97XD /6-311++G(d,p)-SDD/SMD//ω B97XD /6-31G(d)-LANL2DZ energy in tetrahydrofuran solvent = -868.8943343

### INT3a''

| Center Number | Atomic Number | Atomic Type | Coordinates (Angstroms) |           |           |
|---------------|---------------|-------------|-------------------------|-----------|-----------|
|               |               |             | X                       | Y         | Z         |
| 1             | 28            | 0           | -0.242245               | -0.884048 | -0.243297 |
| 2             | 6             | 0           | -2.057089               | 1.139727  | 0.292534  |
| 3             | 6             | 0           | -0.782230               | 0.956590  | -0.088641 |
| 4             | 1             | 0           | -0.184401               | 1.850432  | -0.305119 |

|    |   |   |           |           |           |
|----|---|---|-----------|-----------|-----------|
| 5  | 6 | 0 | -2.958507 | 2.349190  | 0.384501  |
| 6  | 1 | 0 | -2.846278 | 2.906708  | 1.322708  |
| 7  | 1 | 0 | -2.792663 | 3.046654  | -0.449521 |
| 8  | 8 | 0 | -4.288889 | 1.830328  | 0.348892  |
| 9  | 6 | 0 | -4.252982 | 0.482147  | -0.095725 |
| 10 | 1 | 0 | -4.252948 | 0.428579  | -1.198211 |
| 11 | 1 | 0 | -5.154509 | -0.010373 | 0.278125  |
| 12 | 6 | 0 | -2.938721 | -0.071554 | 0.458641  |
| 13 | 6 | 0 | -2.221194 | -1.174664 | -0.282572 |
| 14 | 1 | 0 | -3.071151 | -0.335982 | 1.517415  |
| 15 | 1 | 0 | -2.360338 | -1.192102 | -1.365975 |
| 16 | 6 | 0 | -1.608552 | -2.282784 | 0.334233  |
| 17 | 6 | 0 | -0.586155 | -2.963269 | -0.342341 |
| 18 | 1 | 0 | -1.690601 | -2.389319 | 1.416270  |
| 19 | 1 | 0 | 0.002709  | -3.709567 | 0.182700  |
| 20 | 1 | 0 | -0.628373 | -3.071520 | -1.426406 |
| 21 | 6 | 0 | 1.729941  | -0.635457 | -1.055945 |
| 22 | 6 | 0 | 1.836592  | -1.003338 | 0.259779  |
| 23 | 6 | 0 | 2.110171  | -0.128581 | 1.457407  |
| 24 | 6 | 0 | 3.613579  | 0.054109  | 1.722132  |
| 25 | 6 | 0 | 4.443212  | 0.683355  | 0.632223  |
| 26 | 6 | 0 | 4.074685  | 1.392451  | -0.437587 |
| 27 | 6 | 0 | 2.687879  | 1.782424  | -0.892288 |
| 28 | 6 | 0 | 1.995362  | 0.693109  | -1.726888 |
| 29 | 1 | 0 | 1.666558  | -1.466382 | -1.760941 |
| 30 | 1 | 0 | 1.915181  | -2.071475 | 0.453193  |
| 31 | 1 | 0 | 1.668026  | -0.612349 | 2.336241  |
| 32 | 1 | 0 | 1.604592  | 0.831745  | 1.364857  |
| 33 | 1 | 0 | 3.737235  | 0.637177  | 2.646070  |
| 34 | 1 | 0 | 4.050705  | -0.929900 | 1.942258  |
| 35 | 1 | 0 | 5.513801  | 0.523432  | 0.761275  |
| 36 | 1 | 0 | 4.877085  | 1.723193  | -1.096637 |
| 37 | 1 | 0 | 2.771229  | 2.671872  | -1.527336 |
| 38 | 1 | 0 | 2.056135  | 2.078133  | -0.053364 |
| 39 | 1 | 0 | 1.060669  | 1.088130  | -2.140507 |
| 40 | 1 | 0 | 2.635369  | 0.472898  | -2.592686 |

-----  
Zero-point correction= 0.347921 (Hartree/Particle)

Thermal correction to Energy= 0.365754

Thermal correction to Enthalpy= 0.366698

Thermal correction to Gibbs Free Energy= 0.301258

Sum of electronic and zero-point Energies= -866.742897

Sum of electronic and thermal Energies= -866.725064

Sum of electronic and thermal Enthalpies= -866.724120

Sum of electronic and thermal Free Energies= -866.789560

ωB97XD /6-311++G(d,p)-SDD/SMD//ωB97XD /6-31G(d)-LANL2DZ energy in tetrahydrofuran solvent = -868.934295

## INT5a

-----

| Center<br>Number | Atomic<br>Number | Atomic<br>Type | Coordinates (Angstroms) |           |           |
|------------------|------------------|----------------|-------------------------|-----------|-----------|
|                  |                  |                | X                       | Y         | Z         |
| 1                | 6                | 0              | 0.854521                | -1.433214 | -0.285862 |
| 2                | 6                | 0              | -0.289548               | -1.829950 | -0.823288 |
| 3                | 1                | 0              | -0.641295               | -2.837225 | -1.074055 |
| 4                | 6                | 0              | 2.083434                | -2.147705 | 0.173438  |
| 5                | 1                | 0              | 2.060265                | -2.272678 | 1.270497  |
| 6                | 1                | 0              | 2.142571                | -3.143553 | -0.279484 |
| 7                | 8                | 0              | 3.298672                | -1.507124 | -0.188227 |
| 8                | 6                | 0              | 3.496272                | -0.267406 | 0.445740  |
| 9                | 1                | 0              | 4.536923                | 0.003522  | 0.238845  |
| 10               | 1                | 0              | 3.375060                | -0.363477 | 1.537982  |
| 11               | 6                | 0              | 2.570879                | 0.799226  | -0.078957 |
| 12               | 6                | 0              | 1.854159                | 1.642122  | 0.749240  |
| 13               | 1                | 0              | 2.654438                | 0.989435  | -1.148178 |
| 14               | 1                | 0              | 1.973620                | 1.535226  | 1.825933  |
| 15               | 6                | 0              | 0.730765                | 2.443292  | 0.305138  |

|    |    |   |           |           |           |
|----|----|---|-----------|-----------|-----------|
| 16 | 6  | 0 | 0.232724  | 2.434315  | -0.974878 |
| 17 | 1  | 0 | 0.125494  | 2.891190  | 1.089880  |
| 18 | 1  | 0 | -0.727064 | 2.895367  | -1.178211 |
| 19 | 1  | 0 | 0.826979  | 2.169929  | -1.845535 |
| 20 | 28 | 0 | 0.497662  | 0.411980  | -0.181007 |
| 21 | 6  | 0 | -1.040400 | -0.526656 | -0.964632 |
| 22 | 1  | 0 | -1.173116 | -0.198575 | -2.003738 |
| 23 | 14 | 0 | -2.527854 | -0.255467 | 0.133050  |
| 24 | 6  | 0 | -3.884637 | -1.526236 | -0.227521 |
| 25 | 1  | 0 | -3.496120 | -2.546564 | -0.125921 |
| 26 | 1  | 0 | -4.728298 | -1.421119 | 0.465255  |
| 27 | 1  | 0 | -4.271595 | -1.417725 | -1.247395 |
| 28 | 6  | 0 | -2.004685 | -0.444551 | 1.940342  |
| 29 | 1  | 0 | -1.281911 | 0.331645  | 2.223875  |
| 30 | 1  | 0 | -2.858087 | -0.377537 | 2.625289  |
| 31 | 1  | 0 | -1.517616 | -1.414215 | 2.095014  |
| 32 | 6  | 0 | -3.234779 | 1.480516  | -0.127628 |
| 33 | 1  | 0 | -2.556359 | 2.245214  | 0.268497  |
| 34 | 1  | 0 | -3.390573 | 1.688125  | -1.193154 |
| 35 | 1  | 0 | -4.199514 | 1.598577  | 0.379149  |

-----  
Zero-point correction= 0.293202 (Hartree/Particle)  
Thermal correction to Energy= 0.311757  
Thermal correction to Enthalpy= 0.312701  
Thermal correction to Gibbs Free Energy= 0.247641  
Sum of electronic and zero-point Energies= -1002.774310  
Sum of electronic and thermal Energies= -1002.755755  
Sum of electronic and thermal Enthalpies= -1002.754811  
Sum of electronic and thermal Free Energies= -1002.819871  
ωB97XD /6-311++G(d,p)-SDD/SMD//ωB97XD /6-31G(d)-LANL2DZ energy in tetrahydrofuran solvent = -1004.902548  
**INT4a'**

-----

| Center<br>Number | Atomic<br>Number | Atomic<br>Type | Coordinates (Angstroms) |           |           |
|------------------|------------------|----------------|-------------------------|-----------|-----------|
|                  |                  |                | X                       | Y         | Z         |
| 1                | 6                | 0              | 1.455218                | 1.169255  | -0.691894 |
| 2                | 6                | 0              | 0.484536                | 1.871820  | -1.371523 |
| 3                | 6                | 0              | 0.095257                | 3.309620  | -1.088155 |
| 4                | 6                | 0              | -1.116643               | 3.426186  | -0.140640 |
| 5                | 6                | 0              | -1.165284               | 2.350819  | 0.921063  |
| 6                | 6                | 0              | -0.115111               | 1.893452  | 1.671488  |
| 7                | 6                | 0              | 1.309648                | 2.406046  | 1.572335  |
| 8                | 6                | 0              | 2.188746                | 1.651232  | 0.539281  |
| 9                | 1                | 0              | 1.869044                | 0.278870  | -1.156449 |
| 10               | 1                | 0              | 0.144868                | 1.455462  | -2.319429 |
| 11               | 1                | 0              | -0.146129               | 3.808384  | -2.033183 |
| 12               | 1                | 0              | 0.955032                | 3.849119  | -0.678996 |
| 13               | 1                | 0              | -1.138315               | 4.423868  | 0.322252  |
| 14               | 1                | 0              | -2.033997               | 3.344553  | -0.732850 |
| 15               | 1                | 0              | -2.162658               | 2.030358  | 1.219123  |
| 16               | 1                | 0              | -0.341276               | 1.245003  | 2.514906  |
| 17               | 1                | 0              | 1.785382                | 2.319487  | 2.554671  |
| 18               | 1                | 0              | 1.290688                | 3.475160  | 1.340473  |
| 19               | 1                | 0              | 3.036057                | 2.288700  | 0.248985  |
| 20               | 1                | 0              | 2.632435                | 0.771920  | 1.017794  |
| 21               | 6                | 0              | -0.308317               | -1.289244 | 0.314510  |
| 22               | 6                | 0              | -1.091856               | -2.328038 | -0.352515 |
| 23               | 1                | 0              | -0.567181               | -3.259517 | -0.586574 |
| 24               | 6                | 0              | 0.775227                | -1.862124 | 1.203997  |
| 25               | 1                | 0              | 1.572364                | -1.126840 | 1.377952  |
| 26               | 1                | 0              | 0.295349                | -2.044247 | 2.176823  |
| 27               | 8                | 0              | 1.352596                | -3.108331 | 0.830620  |
| 28               | 6                | 0              | 2.269104                | -2.996311 | -0.237672 |
| 29               | 1                | 0              | 1.796338                | -2.544021 | -1.125131 |
| 30               | 1                | 0              | 2.537664                | -4.028118 | -0.492775 |
| 31               | 6                | 0              | 3.501271                | -2.220308 | 0.138124  |
| 32               | 6                | 0              | 4.072208                | -1.286465 | -0.629701 |

|    |    |   |           |           |           |
|----|----|---|-----------|-----------|-----------|
| 33 | 1  | 0 | 3.932328  | -2.467236 | 1.108992  |
| 34 | 1  | 0 | 3.630190  | -1.049696 | -1.598827 |
| 35 | 6  | 0 | 5.259699  | -0.523540 | -0.257779 |
| 36 | 6  | 0 | 5.775418  | 0.459058  | -1.001851 |
| 37 | 1  | 0 | 5.723575  | -0.779281 | 0.694494  |
| 38 | 1  | 0 | 6.653039  | 1.013804  | -0.685727 |
| 39 | 1  | 0 | 5.334122  | 0.738208  | -1.956127 |
| 40 | 28 | 0 | -0.357518 | 0.499159  | 0.062147  |
| 41 | 6  | 0 | -2.413514 | -2.265259 | -0.628022 |
| 42 | 1  | 0 | -2.844197 | -3.159513 | -1.086557 |
| 43 | 14 | 0 | -3.604639 | -0.858467 | -0.263879 |
| 44 | 6  | 0 | -5.328184 | -1.456119 | -0.754364 |
| 45 | 1  | 0 | -5.626725 | -2.333665 | -0.168915 |
| 46 | 1  | 0 | -6.079082 | -0.675005 | -0.586693 |
| 47 | 1  | 0 | -5.368242 | -1.732587 | -1.814599 |
| 48 | 6  | 0 | -3.630472 | -0.412903 | 1.569322  |
| 49 | 1  | 0 | -2.616139 | -0.221629 | 1.932968  |
| 50 | 1  | 0 | -4.245902 | 0.476355  | 1.754666  |
| 51 | 1  | 0 | -4.051596 | -1.238126 | 2.155103  |
| 52 | 6  | 0 | -3.186539 | 0.637199  | -1.338927 |
| 53 | 1  | 0 | -3.775338 | 1.516057  | -1.048823 |
| 54 | 1  | 0 | -2.123218 | 0.908359  | -1.268405 |
| 55 | 1  | 0 | -3.396286 | 0.418282  | -2.392369 |

-----  
Zero-point correction= 0.476486 (Hartree/Particle)

Thermal correction to Energy= 0.504688

Thermal correction to Enthalpy= 0.505632

Thermal correction to Gibbs Free Energy= 0.417509

Sum of electronic and zero-point Energies= -1314.520926

Sum of electronic and thermal Energies= -1314.492724

Sum of electronic and thermal Enthalpies= -1314.491780

Sum of electronic and thermal Free Energies= -1314.579903

ωB97XD /6-311++G(d,p)-SDD/SMD//ωB97XD /6-31G(d)-LANL2DZ energy in tetrahydrofuran solvent = -1316.9136005

## TS2a

| Center Number | Atomic Number | Atomic Type | Coordinates (Angstroms) |           |           |
|---------------|---------------|-------------|-------------------------|-----------|-----------|
|               |               |             | X                       | Y         | Z         |
| 1             | 6             | 0           | 1.205298                | -1.236847 | -0.159887 |
| 2             | 6             | 0           | -0.115703               | -1.573746 | -0.136519 |
| 3             | 1             | 0           | -0.481336               | -2.446659 | 0.424049  |
| 4             | 6             | 0           | 2.366701                | -2.021216 | 0.344395  |
| 5             | 1             | 0           | 2.525972                | -1.873667 | 1.428120  |
| 6             | 1             | 0           | 2.216388                | -3.088156 | 0.158571  |
| 7             | 8             | 0           | 3.539024                | -1.651928 | -0.355582 |
| 8             | 6             | 0           | 3.732566                | -0.275197 | -0.178249 |
| 9             | 1             | 0           | 4.535569                | 0.020456  | -0.859368 |
| 10            | 1             | 0           | 4.063198                | -0.075217 | 0.855620  |
| 11            | 6             | 0           | 2.493350                | 0.558907  | -0.465424 |
| 12            | 6             | 0           | 2.130350                | 1.532268  | 0.529213  |
| 13            | 1             | 0           | 2.323019                | 0.778259  | -1.516491 |
| 14            | 1             | 0           | 2.640642                | 1.475223  | 1.488108  |
| 15            | 6             | 0           | 1.023349                | 2.422697  | 0.437029  |
| 16            | 6             | 0           | 0.110982                | 2.377122  | -0.628045 |
| 17            | 1             | 0           | 0.771140                | 2.985845  | 1.332624  |
| 18            | 1             | 0           | -0.818265               | 2.930586  | -0.543042 |
| 19            | 1             | 0           | 0.429089                | 2.163723  | -1.646088 |
| 20            | 28            | 0           | 0.445047                | 0.496143  | 0.121362  |
| 21            | 6             | 0           | -1.014982               | -0.554797 | -0.672842 |
| 22            | 1             | 0           | -0.856457               | -0.337999 | -1.731196 |
| 23            | 14            | 0           | -2.748611               | -0.316675 | -0.023338 |
| 24            | 6             | 0           | -3.775563               | -1.892018 | -0.233998 |
| 25            | 1             | 0           | -3.297986               | -2.748150 | 0.257248  |
| 26            | 1             | 0           | -4.775668               | -1.776277 | 0.200754  |
| 27            | 1             | 0           | -3.897068               | -2.143790 | -1.293758 |
| 28            | 6             | 0           | -2.658305               | 0.102895  | 1.816491  |

|    |   |   |           |           |           |
|----|---|---|-----------|-----------|-----------|
| 29 | 1 | 0 | -2.104384 | 1.037124  | 1.969318  |
| 30 | 1 | 0 | -3.652647 | 0.220440  | 2.262833  |
| 31 | 1 | 0 | -2.134467 | -0.686028 | 2.370209  |
| 32 | 6 | 0 | -3.582585 | 1.088784  | -0.966573 |
| 33 | 1 | 0 | -3.070308 | 2.041623  | -0.794146 |
| 34 | 1 | 0 | -3.574852 | 0.896434  | -2.045884 |
| 35 | 1 | 0 | -4.627293 | 1.209990  | -0.657765 |

-----  
Zero-point correction= 0.293033 (Hartree/Particle)  
Thermal correction to Energy= 0.310843  
Thermal correction to Enthalpy= 0.311787  
Thermal correction to Gibbs Free Energy= 0.247730  
Sum of electronic and zero-point Energies= -1002.759370  
Sum of electronic and thermal Energies= -1002.741560  
Sum of electronic and thermal Enthalpies= -1002.740616  
Sum of electronic and thermal Free Energies= -1002.804673  
ωB97XD /6-311++G(d,p)-SDD/SMD//ωB97XD /6-31G(d)-LANL2DZ energy in tetrahydrofuran solvent = -1004.886101

### INT6a

| Center Number | Atomic Number | Atomic Type | Coordinates (Angstroms) |           |           |
|---------------|---------------|-------------|-------------------------|-----------|-----------|
|               |               |             | X                       | Y         | Z         |
| 1             | 6             | 0           | 1.370438                | -0.977454 | -0.053946 |
| 2             | 6             | 0           | -0.016734               | -1.190970 | 0.029005  |
| 3             | 1             | 0           | -0.330352               | -1.906331 | 0.792806  |
| 4             | 6             | 0           | 2.390295                | -1.866701 | 0.642850  |
| 5             | 1             | 0           | 2.349327                | -1.825819 | 1.734693  |
| 6             | 1             | 0           | 2.235166                | -2.910679 | 0.327315  |
| 7             | 8             | 0           | 3.668631                | -1.412504 | 0.236569  |
| 8             | 6             | 0           | 3.521421                | -0.773500 | -1.018589 |
| 9             | 1             | 0           | 3.465483                | -1.511598 | -1.834126 |
| 10            | 1             | 0           | 4.392329                | -0.130668 | -1.169749 |
| 11            | 6             | 0           | 2.205040                | -0.006807 | -0.909735 |
| 12            | 6             | 0           | 2.303905                | 1.134788  | 0.107018  |
| 13            | 1             | 0           | 1.773544                | 0.270415  | -1.874568 |
| 14            | 1             | 0           | 3.108499                | 0.996748  | 0.825874  |
| 15            | 6             | 0           | 1.525288                | 2.303403  | 0.237362  |
| 16            | 6             | 0           | 0.288656                | 2.524215  | -0.422703 |
| 17            | 1             | 0           | 1.771682                | 2.937054  | 1.088648  |
| 18            | 1             | 0           | -0.303808               | 3.381116  | -0.115437 |
| 19            | 1             | 0           | 0.149798                | 2.232202  | -1.461504 |
| 20            | 28            | 0           | 0.347675                | 0.720181  | 0.477734  |
| 21            | 6             | 0           | -0.996908               | -0.345906 | -0.571989 |
| 22            | 1             | 0           | -0.757322               | 0.055757  | -1.559948 |
| 23            | 14            | 0           | -2.805324               | -0.375921 | -0.115730 |
| 24            | 6             | 0           | -3.726998               | -1.751496 | -1.029420 |
| 25            | 1             | 0           | -3.311887               | -2.735470 | -0.781836 |
| 26            | 1             | 0           | -4.792657               | -1.762223 | -0.770976 |
| 27            | 1             | 0           | -3.647715               | -1.622995 | -2.115184 |
| 28            | 6             | 0           | -2.967423               | -0.653049 | 1.744022  |
| 29            | 1             | 0           | -2.465351               | 0.150724  | 2.295033  |
| 30            | 1             | 0           | -4.018794               | -0.672608 | 2.053577  |
| 31            | 1             | 0           | -2.516302               | -1.603261 | 2.054320  |
| 32            | 6             | 0           | -3.539602               | 1.291915  | -0.594681 |
| 33            | 1             | 0           | -3.032413               | 2.098137  | -0.053299 |
| 34            | 1             | 0           | -3.411486               | 1.480357  | -1.667317 |
| 35            | 1             | 0           | -4.611442               | 1.346369  | -0.372358 |

-----  
Zero-point correction= 0.295098 (Hartree/Particle)  
Thermal correction to Energy= 0.313075  
Thermal correction to Enthalpy= 0.314020  
Thermal correction to Gibbs Free Energy= 0.249358  
Sum of electronic and zero-point Energies= -1002.815334  
Sum of electronic and thermal Energies= -1002.797357  
Sum of electronic and thermal Enthalpies= -1002.796413  
Sum of electronic and thermal Free Energies= -1002.861074

ωB97XD /6-311++G(d,p)-SDD/SMD//ωB97XD /6-31G(d)-LANL2DZ energy in tetrahydrofuran solvent = -1004.9409709

INT7a

| Center<br>Number | Atomic<br>Number | Atomic<br>Type | Coordinates (Angstroms) |           |           |
|------------------|------------------|----------------|-------------------------|-----------|-----------|
|                  |                  |                | X                       | Y         | Z         |
| 1                | 6                | 0              | -0.422863               | 1.902165  | -0.710165 |
| 2                | 6                | 0              | -1.301621               | 0.847125  | -0.991741 |
| 3                | 1                | 0              | -1.136160               | 0.331283  | -1.939513 |
| 4                | 6                | 0              | 0.532994                | 2.511962  | -1.723126 |
| 5                | 1                | 0              | 1.352326                | 1.857184  | -2.031537 |
| 6                | 1                | 0              | -0.030006               | 2.808545  | -2.623265 |
| 7                | 8                | 0              | 1.105028                | 3.648500  | -1.100306 |
| 8                | 6                | 0              | 0.197162                | 4.099054  | -0.109840 |
| 9                | 1                | 0              | -0.612589               | 4.695768  | -0.559159 |
| 10               | 1                | 0              | 0.755981                | 4.719384  | 0.595791  |
| 11               | 6                | 0              | -0.366847               | 2.821556  | 0.503963  |
| 12               | 6                | 0              | 0.675818                | 2.054548  | 1.294997  |
| 13               | 1                | 0              | -1.315438               | 2.962461  | 1.028598  |
| 14               | 1                | 0              | 1.705367                | 2.307399  | 1.049930  |
| 15               | 6                | 0              | 0.457716                | 1.139298  | 2.338377  |
| 16               | 6                | 0              | -0.788195               | 0.540567  | 2.618930  |
| 17               | 1                | 0              | 1.349532                | 0.713533  | 2.790589  |
| 18               | 1                | 0              | -0.812268               | -0.264225 | 3.348796  |
| 19               | 1                | 0              | -1.711192               | 1.106762  | 2.541923  |
| 20               | 28               | 0              | -0.231400               | 0.274662  | 0.637520  |
| 21               | 6                | 0              | -2.190804               | 0.274371  | -0.047133 |
| 22               | 1                | 0              | -2.623585               | 0.955559  | 0.685606  |
| 23               | 14               | 0              | -3.143811               | -1.301359 | -0.348901 |
| 24               | 6                | 0              | -4.993450               | -0.968676 | -0.155933 |
| 25               | 1                | 0              | -5.341603               | -0.230769 | -0.887635 |
| 26               | 1                | 0              | -5.579885               | -1.884608 | -0.294156 |
| 27               | 1                | 0              | -5.218648               | -0.577828 | 0.843535  |
| 28               | 6                | 0              | -2.814407               | -1.932515 | -2.101037 |
| 29               | 1                | 0              | -1.750340               | -2.116841 | -2.290321 |
| 30               | 1                | 0              | -3.344451               | -2.876271 | -2.274149 |
| 31               | 1                | 0              | -3.164321               | -1.212145 | -2.849824 |
| 32               | 6                | 0              | -2.645092               | -2.621451 | 0.904576  |
| 33               | 1                | 0              | -1.610376               | -2.946125 | 0.747031  |
| 34               | 1                | 0              | -2.708398               | -2.216285 | 1.920968  |
| 35               | 1                | 0              | -3.290909               | -3.505763 | 0.845784  |
| 36               | 6                | 0              | 4.292702                | -2.205707 | -0.242041 |
| 37               | 6                | 0              | 4.037175                | -1.461506 | -1.320517 |
| 38               | 6                | 0              | 2.965198                | -0.420436 | -1.555149 |
| 39               | 6                | 0              | 1.576873                | -1.041215 | -1.760728 |
| 40               | 6                | 0              | 0.837968                | -1.516142 | -0.538213 |
| 41               | 6                | 0              | 1.214380                | -1.594377 | 0.760409  |
| 42               | 6                | 0              | 2.531391                | -1.228298 | 1.409581  |
| 43               | 6                | 0              | 3.671202                | -2.214910 | 1.127101  |
| 44               | 1                | 0              | 5.097958                | -2.934265 | -0.343542 |
| 45               | 1                | 0              | 4.651926                | -1.670253 | -2.195614 |
| 46               | 1                | 0              | 3.225528                | 0.127786  | -2.467684 |
| 47               | 1                | 0              | 2.918721                | 0.331379  | -0.762249 |
| 48               | 1                | 0              | 0.934520                | -0.326506 | -2.290109 |
| 49               | 1                | 0              | 1.673360                | -1.897850 | -2.443036 |
| 50               | 1                | 0              | -0.109249               | -1.996354 | -0.777520 |
| 51               | 1                | 0              | 0.528431                | -2.131276 | 1.414256  |
| 52               | 1                | 0              | 2.369962                | -1.222956 | 2.493280  |
| 53               | 1                | 0              | 2.847308                | -0.214549 | 1.151479  |
| 54               | 1                | 0              | 4.474498                | -2.028288 | 1.854857  |
| 55               | 1                | 0              | 3.322527                | -3.235869 | 1.339538  |

Zero-point correction= 0.480626 (Hartree/Particle)  
 Thermal correction to Energy= 0.507427  
 Thermal correction to Enthalpy= 0.508372  
 Thermal correction to Gibbs Free Energy= 0.424876



Sum of electronic and zero-point Energies= -1314.583561  
 Sum of electronic and thermal Energies= -1314.556760  
 Sum of electronic and thermal Enthalpies= -1314.555815  
 Sum of electronic and thermal Free Energies= -1314.639311  
 ωB97XD /6-311++G(d,p)-SDD/SMD//ωB97XD /6-31G(d)-LANL2DZ energy in tetrahydrofuran solvent = -1316.9796196

### TS3a

| Center<br>Number | Atomic<br>Number | Atomic<br>Type | Coordinates (Angstroms) |           |           |
|------------------|------------------|----------------|-------------------------|-----------|-----------|
|                  |                  |                | X                       | Y         | Z         |
| 1                | 6                | 0              | -0.491740               | -1.940141 | 0.536831  |
| 2                | 6                | 0              | -1.255815               | -0.766730 | 0.831953  |
| 3                | 1                | 0              | -1.048577               | -0.305397 | 1.797240  |
| 4                | 6                | 0              | 0.318279                | -2.671064 | 1.595872  |
| 5                | 1                | 0              | 1.231371                | -2.156334 | 1.907544  |
| 6                | 1                | 0              | -0.316736               | -2.824966 | 2.483211  |
| 7                | 8                | 0              | 0.693306                | -3.911841 | 1.025784  |
| 8                | 6                | 0              | -0.259804               | -4.240192 | 0.028896  |
| 9                | 1                | 0              | -1.147445               | -4.719201 | 0.470063  |
| 10               | 1                | 0              | 0.216407                | -4.934213 | -0.668659 |
| 11               | 6                | 0              | -0.644296               | -2.905666 | -0.592681 |
| 12               | 6                | 0              | 0.516506                | -2.143140 | -1.137921 |
| 13               | 1                | 0              | -1.567011               | -2.883770 | -1.171909 |
| 14               | 1                | 0              | 1.492207                | -2.517302 | -0.840882 |
| 15               | 6                | 0              | 0.485400                | -1.144018 | -2.162503 |
| 16               | 6                | 0              | -0.660052               | -0.506381 | -2.637708 |
| 17               | 1                | 0              | 1.455514                | -0.834177 | -2.539337 |
| 18               | 1                | 0              | -0.549826               | 0.250928  | -3.408351 |
| 19               | 1                | 0              | -1.638024               | -0.971043 | -2.583055 |
| 20               | 28               | 0              | -0.135205               | 0.016621  | -0.647399 |
| 21               | 6                | 0              | -2.175996               | -0.163717 | -0.031925 |
| 22               | 1                | 0              | -2.597034               | -0.782327 | -0.822214 |
| 23               | 14               | 0              | -3.072009               | 1.428699  | 0.360039  |
| 24               | 6                | 0              | -4.931073               | 1.158170  | 0.161882  |
| 25               | 1                | 0              | -5.296835               | 0.391443  | 0.854272  |
| 26               | 1                | 0              | -5.488676               | 2.081927  | 0.356406  |
| 27               | 1                | 0              | -5.174793               | 0.832794  | -0.856540 |
| 28               | 6                | 0              | -2.706134               | 1.946246  | 2.139751  |
| 29               | 1                | 0              | -1.635047               | 2.096518  | 2.316939  |
| 30               | 1                | 0              | -3.212584               | 2.889428  | 2.375461  |
| 31               | 1                | 0              | -3.059635               | 1.191311  | 2.851744  |
| 32               | 6                | 0              | -2.534535               | 2.795237  | -0.823959 |
| 33               | 1                | 0              | -1.473957               | 3.032724  | -0.686081 |
| 34               | 1                | 0              | -2.663735               | 2.472952  | -1.863547 |
| 35               | 1                | 0              | -3.113610               | 3.714562  | -0.675669 |
| 36               | 6                | 0              | 4.386777                | 1.987478  | 0.332520  |
| 37               | 6                | 0              | 4.091169                | 1.193326  | 1.364656  |
| 38               | 6                | 0              | 2.973471                | 0.188948  | 1.543671  |
| 39               | 6                | 0              | 1.612150                | 0.860844  | 1.776035  |
| 40               | 6                | 0              | 0.887564                | 1.414825  | 0.569389  |
| 41               | 6                | 0              | 1.298068                | 1.539602  | -0.745347 |
| 42               | 6                | 0              | 2.620186                | 1.158189  | -1.380328 |
| 43               | 6                | 0              | 3.779862                | 2.100365  | -1.038779 |
| 44               | 1                | 0              | 5.221295                | 2.673622  | 0.483172  |
| 45               | 1                | 0              | 4.708487                | 1.326665  | 2.252792  |
| 46               | 1                | 0              | 3.207314                | -0.411942 | 2.430300  |
| 47               | 1                | 0              | 2.900084                | -0.522656 | 0.715984  |
| 48               | 1                | 0              | 0.950895                | 0.154468  | 2.295166  |
| 49               | 1                | 0              | 1.759512                | 1.686356  | 2.487055  |
| 50               | 1                | 0              | 0.053408                | 2.057205  | 0.850172  |
| 51               | 1                | 0              | 0.737205                | 2.264858  | -1.336345 |
| 52               | 1                | 0              | 2.478491                | 1.188626  | -2.467551 |
| 53               | 1                | 0              | 2.914331                | 0.131837  | -1.148375 |
| 54               | 1                | 0              | 4.586661                | 1.938767  | -1.769192 |
| 55               | 1                | 0              | 3.457853                | 3.140824  | -1.191298 |

Zero-point correction= 0.479978 (Hartree/Particle)  
 Thermal correction to Energy= 0.505960  
 Thermal correction to Enthalpy= 0.506904  
 Thermal correction to Gibbs Free Energy= 0.425716  
 Sum of electronic and zero-point Energies= -1314.580274  
 Sum of electronic and thermal Energies= -1314.554291  
 Sum of electronic and thermal Enthalpies= -1314.553347  
 Sum of electronic and thermal Free Energies= -1314.634536  
 ωB97XD /6-311++G(d,p)-SDD/SMD//ωB97XD /6-31G(d)-LANL2DZ energy in tetrahydrofuran solvent = -1316.9734142

### INT8a

| Center Number | Atomic Number | Atomic Type | Coordinates (Angstroms) |           |           |
|---------------|---------------|-------------|-------------------------|-----------|-----------|
|               |               |             | X                       | Y         | Z         |
| 1             | 6             | 0           | -1.336812               | 1.773811  | -0.486158 |
| 2             | 6             | 0           | -1.222931               | 0.306747  | -0.677992 |
| 3             | 1             | 0           | -0.740601               | 0.008696  | -1.608346 |
| 4             | 6             | 0           | -1.387925               | 2.684915  | -1.703847 |
| 5             | 1             | 0           | -0.414918               | 2.850972  | -2.177211 |
| 6             | 1             | 0           | -2.078182               | 2.258971  | -2.450128 |
| 7             | 8             | 0           | -1.854716               | 3.934864  | -1.231639 |
| 8             | 6             | 0           | -2.731333               | 3.692990  | -0.142291 |
| 9             | 1             | 0           | -3.757984               | 3.503028  | -0.492637 |
| 10            | 1             | 0           | -2.729769               | 4.592339  | 0.480502  |
| 11            | 6             | 0           | -2.185319               | 2.456472  | 0.546815  |
| 12            | 6             | 0           | -0.699326               | 2.452542  | 0.757270  |
| 13            | 1             | 0           | -2.830502               | 1.895331  | 1.215761  |
| 14            | 1             | 0           | -0.186529               | 3.387251  | 0.537820  |
| 15            | 6             | 0           | -0.023852               | 1.611870  | 1.775301  |
| 16            | 6             | 0           | -0.583521               | 0.672145  | 2.596917  |
| 17            | 1             | 0           | 1.015502                | 1.877776  | 1.944851  |
| 18            | 1             | 0           | 0.012161                | 0.233457  | 3.392805  |
| 19            | 1             | 0           | -1.655454               | 0.515401  | 2.663057  |
| 20            | 28            | 0           | 0.135582                | -0.302342 | 0.795278  |
| 21            | 6             | 0           | -1.844080               | -0.641131 | 0.107355  |
| 22            | 1             | 0           | -2.526647               | -0.262727 | 0.870775  |
| 23            | 14            | 0           | -2.036089               | -2.469452 | -0.260359 |
| 24            | 6             | 0           | -3.888725               | -2.807201 | -0.422986 |
| 25            | 1             | 0           | -4.317772               | -2.260113 | -1.270204 |
| 26            | 1             | 0           | -4.081807               | -3.875057 | -0.580609 |
| 27            | 1             | 0           | -4.430542               | -2.502367 | 0.480153  |
| 28            | 6             | 0           | -1.193559               | -2.960401 | -1.873176 |
| 29            | 1             | 0           | -0.106526               | -3.027374 | -1.775414 |
| 30            | 1             | 0           | -1.559901               | -3.941336 | -2.198293 |
| 31            | 1             | 0           | -1.418241               | -2.245031 | -2.672950 |
| 32            | 6             | 0           | -1.378917               | -3.483857 | 1.188102  |
| 33            | 1             | 0           | -0.309628               | -3.309434 | 1.349094  |
| 34            | 1             | 0           | -1.900087               | -3.210698 | 2.113467  |
| 35            | 1             | 0           | -1.529804               | -4.557351 | 1.024590  |
| 36            | 6             | 0           | 4.872173                | 0.059258  | -0.543460 |
| 37            | 6             | 0           | 4.144374                | 0.211813  | -1.653150 |
| 38            | 6             | 0           | 2.647730                | 0.342006  | -1.841539 |
| 39            | 6             | 0           | 1.907477                | -0.982665 | -1.595203 |
| 40            | 6             | 0           | 1.580273                | -1.335684 | -0.157587 |
| 41            | 6             | 0           | 2.054023                | -0.764752 | 1.038562  |
| 42            | 6             | 0           | 3.020116                | 0.389336  | 1.241038  |
| 43            | 6             | 0           | 4.482463                | 0.072668  | 0.909303  |
| 44            | 1             | 0           | 5.943064                | -0.084483 | -0.693719 |
| 45            | 1             | 0           | 4.701056                | 0.163628  | -2.588989 |
| 46            | 1             | 0           | 2.471372                | 0.641365  | -2.880764 |
| 47            | 1             | 0           | 2.204956                | 1.131422  | -1.226080 |
| 48            | 1             | 0           | 0.979654                | -0.985079 | -2.180977 |
| 49            | 1             | 0           | 2.516855                | -1.793534 | -2.019676 |
| 50            | 1             | 0           | 1.267511                | -2.377730 | -0.060435 |
| 51            | 1             | 0           | 2.040236                | -1.444557 | 1.896282  |
| 52            | 1             | 0           | 2.970696                | 0.665137  | 2.302409  |

|    |   |   |          |           |          |
|----|---|---|----------|-----------|----------|
| 53 | 1 | 0 | 2.725255 | 1.286204  | 0.689609 |
| 54 | 1 | 0 | 5.123428 | 0.813916  | 1.409502 |
| 55 | 1 | 0 | 4.755845 | -0.894312 | 1.356447 |

-----  
Zero-point correction= 0.481460 (Hartree/Particle)  
Thermal correction to Energy= 0.507688  
Thermal correction to Enthalpy= 0.508632  
Thermal correction to Gibbs Free Energy= 0.426269  
Sum of electronic and zero-point Energies= -1314.595321  
Sum of electronic and thermal Energies= -1314.569093  
Sum of electronic and thermal Enthalpies= -1314.568149  
Sum of electronic and thermal Free Energies= -1314.650512  
ωB97XD /6-311++G(d,p)-SDD/SMD//ωB97XD /6-31G(d)-LANL2DZ energy in tetrahydrofuran solvent = -1316.9872713

**TS3a'**

-----

| Center<br>Number | Atomic<br>Number | Atomic<br>Type | Coordinates (Angstroms) |           |           |
|------------------|------------------|----------------|-------------------------|-----------|-----------|
|                  |                  |                | X                       | Y         | Z         |
| 1                | 6                | 0              | -0.063700               | 2.068943  | 0.375012  |
| 2                | 6                | 0              | 1.083324                | 1.363170  | 0.700096  |
| 3                | 1                | 0              | 1.295655                | 1.165017  | 1.749161  |
| 4                | 6                | 0              | -1.021014               | 2.708078  | 1.360155  |
| 5                | 1                | 0              | -1.433057               | 2.013553  | 2.096852  |
| 6                | 1                | 0              | -0.518111               | 3.531585  | 1.895386  |
| 7                | 8                | 0              | -2.088952               | 3.216070  | 0.580012  |
| 8                | 6                | 0              | -1.528047               | 3.591579  | -0.666428 |
| 9                | 1                | 0              | -0.995164               | 4.551716  | -0.576356 |
| 10               | 1                | 0              | -2.345352               | 3.702698  | -1.383600 |
| 11               | 6                | 0              | -0.548081               | 2.471011  | -1.016680 |
| 12               | 6                | 0              | -1.262867               | 1.222323  | -1.503114 |
| 13               | 1                | 0              | 0.245735                | 2.807484  | -1.693231 |
| 14               | 1                | 0              | -2.346510               | 1.220120  | -1.423189 |
| 15               | 6                | 0              | -0.631781               | 0.099217  | -1.990174 |
| 16               | 6                | 0              | 0.828605                | 0.010767  | -2.021513 |
| 17               | 1                | 0              | -1.240408               | -0.756941 | -2.265203 |
| 18               | 1                | 0              | 1.223172                | -0.971227 | -2.272100 |
| 19               | 1                | 0              | 1.314816                | 0.791457  | -2.596452 |
| 20               | 28               | 0              | -0.076410               | -0.057406 | -0.051918 |
| 21               | 6                | 0              | 1.931320                | 0.795692  | -0.354618 |
| 22               | 1                | 0              | 2.235096                | 1.550979  | -1.076116 |
| 23               | 14               | 0              | 3.362276                | -0.331209 | 0.148141  |
| 24               | 6                | 0              | 4.965855                | 0.655529  | -0.007510 |
| 25               | 1                | 0              | 4.945281                | 1.547287  | 0.629721  |
| 26               | 1                | 0              | 5.832260                | 0.052517  | 0.289084  |
| 27               | 1                | 0              | 5.130120                | 0.986899  | -1.039715 |
| 28               | 6                | 0              | 3.154363                | -0.887727 | 1.938026  |
| 29               | 1                | 0              | 2.189441                | -1.377236 | 2.106766  |
| 30               | 1                | 0              | 3.941134                | -1.602827 | 2.204949  |
| 31               | 1                | 0              | 3.228487                | -0.043917 | 2.633727  |
| 32               | 6                | 0              | 3.479922                | -1.844532 | -0.969329 |
| 33               | 1                | 0              | 2.569303                | -2.451181 | -0.916382 |
| 34               | 1                | 0              | 3.635497                | -1.561818 | -2.016852 |
| 35               | 1                | 0              | 4.323721                | -2.476636 | -0.668425 |
| 36               | 6                | 0              | -3.557696               | -0.929046 | -0.295278 |
| 37               | 6                | 0              | -3.241937               | -2.095303 | -0.860230 |
| 38               | 6                | 0              | -2.412623               | -3.220397 | -0.297142 |
| 39               | 6                | 0              | -0.894280               | -3.039343 | -0.442682 |
| 40               | 6                | 0              | -0.215240               | -2.020776 | 0.454550  |
| 41               | 6                | 0              | -0.740969               | -1.209213 | 1.467244  |
| 42               | 6                | 0              | -2.180811               | -1.055063 | 1.947716  |
| 43               | 6                | 0              | -3.200363               | -0.349322 | 1.043954  |
| 44               | 1                | 0              | -4.182998               | -0.260029 | -0.889402 |
| 45               | 1                | 0              | -3.617845               | -2.263430 | -1.869839 |
| 46               | 1                | 0              | -2.686300               | -4.139609 | -0.828594 |
| 47               | 1                | 0              | -2.652008               | -3.402660 | 0.753626  |
| 48               | 1                | 0              | -0.430573               | -4.012464 | -0.225712 |

|    |   |   |           |           |           |
|----|---|---|-----------|-----------|-----------|
| 49 | 1 | 0 | -0.654591 | -2.836295 | -1.496602 |
| 50 | 1 | 0 | 0.842284  | -2.259021 | 0.580107  |
| 51 | 1 | 0 | -0.025523 | -0.955914 | 2.251493  |
| 52 | 1 | 0 | -2.139312 | -0.456983 | 2.866735  |
| 53 | 1 | 0 | -2.578190 | -2.026747 | 2.265375  |
| 54 | 1 | 0 | -4.134389 | -0.241713 | 1.616587  |
| 55 | 1 | 0 | -2.856313 | 0.677533  | 0.865512  |

-----  
Zero-point correction= 0.481385 (Hartree/Particle)  
Thermal correction to Energy= 0.506619  
Thermal correction to Enthalpy= 0.507563  
Thermal correction to Gibbs Free Energy= 0.429103  
Sum of electronic and zero-point Energies= -1314.560713  
Sum of electronic and thermal Energies= -1314.535478  
Sum of electronic and thermal Enthalpies= -1314.534534  
Sum of electronic and thermal Free Energies= -1314.612995  
ωB97XD /6-311++G(d,p)-SDD/SMD//ωB97XD /6-31G(d)-LANL2DZ energy in tetrahydrofuran solvent = -1316.952287

### INT9a

-----

| Center Number | Atomic Number | Atomic Type | Coordinates (Angstroms) |           |           |
|---------------|---------------|-------------|-------------------------|-----------|-----------|
|               |               |             | X                       | Y         | Z         |
| 1             | 6             | 0           | 1.536075                | -0.420715 | 0.314428  |
| 2             | 6             | 0           | 0.070480                | -0.571023 | 0.456721  |
| 3             | 1             | 0           | -0.236078               | -1.086311 | 1.369787  |
| 4             | 6             | 0           | 2.423869                | -1.600079 | 0.695986  |
| 5             | 1             | 0           | 2.582353                | -1.713042 | 1.773419  |
| 6             | 1             | 0           | 1.980298                | -2.529725 | 0.304081  |
| 7             | 8             | 0           | 3.685634                | -1.347909 | 0.105583  |
| 8             | 6             | 0           | 3.467915                | -0.627933 | -1.098757 |
| 9             | 1             | 0           | 3.270006                | -1.312153 | -1.938761 |
| 10            | 1             | 0           | 4.382761                | -0.065832 | -1.307975 |
| 11            | 6             | 0           | 2.249476                | 0.235235  | -0.837122 |
| 12            | 6             | 0           | 2.233836                | 0.941756  | 0.485821  |
| 13            | 1             | 0           | 1.703496                | 0.638754  | -1.683869 |
| 14            | 1             | 0           | 3.159319                | 0.887353  | 1.059937  |
| 15            | 6             | 0           | 1.437511                | 2.168433  | 0.727865  |
| 16            | 6             | 0           | 0.882328                | 2.947176  | -0.197489 |
| 17            | 1             | 0           | 1.299443                | 2.422257  | 1.778493  |
| 18            | 1             | 0           | 0.299069                | 3.820849  | 0.076761  |
| 19            | 1             | 0           | 0.994966                | 2.751551  | -1.260683 |
| 20            | 6             | 0           | -0.867457               | -0.111622 | -0.380226 |
| 21            | 1             | 0           | -0.526459               | 0.398684  | -1.283826 |
| 22            | 14            | 0           | -2.710884               | -0.246310 | -0.083760 |
| 23            | 6             | 0           | -3.503709               | -1.250432 | -1.470274 |
| 24            | 1             | 0           | -3.080638               | -2.259922 | -1.517135 |
| 25            | 1             | 0           | -4.585325               | -1.345558 | -1.319578 |
| 26            | 1             | 0           | -3.344459               | -0.776918 | -2.445766 |
| 27            | 6             | 0           | -3.028733               | -1.090114 | 1.571544  |
| 28            | 1             | 0           | -2.605746               | -0.515397 | 2.402961  |
| 29            | 1             | 0           | -4.105269               | -1.190409 | 1.750112  |
| 30            | 1             | 0           | -2.594139               | -2.095651 | 1.602118  |
| 31            | 6             | 0           | -3.452757               | 1.487715  | -0.071847 |
| 32            | 1             | 0           | -3.004664               | 2.100233  | 0.718121  |
| 33            | 1             | 0           | -3.279147               | 1.997243  | -1.026524 |
| 34            | 1             | 0           | -4.535480               | 1.455233  | 0.096397  |

-----  
Zero-point correction= 0.294277 (Hartree/Particle)  
Thermal correction to Energy= 0.311615  
Thermal correction to Enthalpy= 0.312559  
Thermal correction to Gibbs Free Energy= 0.247995  
Sum of electronic and zero-point Energies= -833.513648  
Sum of electronic and thermal Energies= -833.496310  
Sum of electronic and thermal Enthalpies= -833.495366  
Sum of electronic and thermal Free Energies= -833.559930  
ωB97XD /6-311++G(d,p)-SDD/SMD//ωB97XD /6-31G(d)-LANL2DZ energy in tetrahydrofuran solvent = -833.986429

**INT10a**

| Center Number | Atomic Number | Atomic Type | Coordinates (Angstroms) |           |           |
|---------------|---------------|-------------|-------------------------|-----------|-----------|
|               |               |             | X                       | Y         | Z         |
| 1             | 6             | 0           | 1.378981                | -0.734495 | -0.471978 |
| 2             | 6             | 0           | 0.262485                | -0.892594 | -1.333125 |
| 3             | 1             | 0           | 0.573360                | -1.170929 | -2.343043 |
| 4             | 6             | 0           | 2.769642                | -1.073134 | -0.984289 |
| 5             | 1             | 0           | 2.752542                | -1.813715 | -1.787746 |
| 6             | 1             | 0           | 3.314407                | -0.183175 | -1.341702 |
| 7             | 8             | 0           | 3.430769                | -1.645994 | 0.124393  |
| 8             | 6             | 0           | 3.033497                | -0.933870 | 1.280853  |
| 9             | 1             | 0           | 3.764596                | -0.148585 | 1.524382  |
| 10            | 1             | 0           | 2.998593                | -1.644742 | 2.110711  |
| 11            | 6             | 0           | 1.653745                | -0.307921 | 0.981108  |
| 12            | 6             | 0           | 1.635574                | 1.191567  | 0.717813  |
| 13            | 1             | 0           | 0.893856                | -0.604374 | 1.703980  |
| 14            | 1             | 0           | 2.534218                | 1.657595  | 0.317024  |
| 15            | 6             | 0           | 0.451711                | 1.941033  | 0.994010  |
| 16            | 6             | 0           | -0.056387               | 2.871137  | 0.077474  |
| 17            | 1             | 0           | -0.231846               | 1.559131  | 1.754517  |
| 18            | 1             | 0           | -1.018188               | 3.340484  | 0.258157  |
| 19            | 1             | 0           | 0.615552                | 3.408409  | -0.594220 |
| 20            | 28            | 0           | 0.288961                | 1.001372  | -0.724145 |
| 21            | 6             | 0           | -1.085649               | -0.437466 | -1.210263 |
| 22            | 1             | 0           | -1.596261               | -0.475048 | -2.176811 |
| 23            | 14            | 0           | -2.346751               | -0.627727 | 0.161585  |
| 24            | 6             | 0           | -3.636464               | -1.864121 | -0.459440 |
| 25            | 1             | 0           | -3.180169               | -2.841269 | -0.655457 |
| 26            | 1             | 0           | -4.436754               | -2.007004 | 0.276736  |
| 27            | 1             | 0           | -4.099440               | -1.520105 | -1.391876 |
| 28            | 6             | 0           | -1.642175               | -1.311799 | 1.777623  |
| 29            | 1             | 0           | -1.155959               | -0.543902 | 2.389084  |
| 30            | 1             | 0           | -2.457234               | -1.731957 | 2.378802  |
| 31            | 1             | 0           | -0.918953               | -2.114159 | 1.593044  |
| 32            | 6             | 0           | -3.230155               | 1.003904  | 0.508959  |
| 33            | 1             | 0           | -2.597201               | 1.690094  | 1.081779  |
| 34            | 1             | 0           | -3.493301               | 1.505404  | -0.429212 |
| 35            | 1             | 0           | -4.153207               | 0.842107  | 1.078085  |

Zero-point correction= 0.295621 (Hartree/Particle)

Thermal correction to Energy= 0.313211

Thermal correction to Enthalpy= 0.314155

Thermal correction to Gibbs Free Energy= 0.251631

Sum of electronic and zero-point Energies= -1002.796716

Sum of electronic and thermal Energies= -1002.779125

Sum of electronic and thermal Enthalpies= -1002.778181

Sum of electronic and thermal Free Energies= -1002.840705

ωB97XD /6-311++G(d,p)-SDD/SMD//ωB97XD /6-31G(d)-LANL2DZ energy in tetrahydrofuran solvent = -1004.9242715

**INT11a**

| Center Number | Atomic Number | Atomic Type | Coordinates (Angstroms) |           |           |
|---------------|---------------|-------------|-------------------------|-----------|-----------|
|               |               |             | X                       | Y         | Z         |
| 1             | 6             | 0           | 0.396854                | 1.480168  | -0.726049 |
| 2             | 6             | 0           | 0.405504                | 0.157476  | -1.220868 |
| 3             | 1             | 0           | -0.440516               | -0.035474 | -1.882565 |
| 4             | 6             | 0           | -0.523999               | 2.551730  | -1.273913 |
| 5             | 1             | 0           | -0.893005               | 2.322616  | -2.277020 |
| 6             | 1             | 0           | -1.389989               | 2.745086  | -0.622456 |
| 7             | 8             | 0           | 0.288809                | 3.707297  | -1.348748 |
| 8             | 6             | 0           | 1.086302                | 3.707844  | -0.181031 |
| 9             | 1             | 0           | 0.546253                | 4.179713  | 0.655950  |
| 10            | 1             | 0           | 1.983835                | 4.294047  | -0.389179 |
| 11            | 6             | 0           | 1.389784                | 2.230094  | 0.137428  |

|    |    |   |           |           |           |
|----|----|---|-----------|-----------|-----------|
| 12 | 6  | 0 | 0.850191  | 1.684624  | 1.429399  |
| 13 | 1  | 0 | 2.432945  | 1.965342  | -0.033340 |
| 14 | 1  | 0 | 0.027745  | 2.210601  | 1.910195  |
| 15 | 6  | 0 | 1.431039  | 0.525046  | 1.996252  |
| 16 | 6  | 0 | 0.662020  | -0.410815 | 2.708489  |
| 17 | 1  | 0 | 2.423046  | 0.239864  | 1.662204  |
| 18 | 1  | 0 | 1.121960  | -1.349054 | 3.006529  |
| 19 | 1  | 0 | -0.170614 | -0.084204 | 3.326655  |
| 20 | 28 | 0 | -0.054255 | -0.091680 | 0.800131  |
| 21 | 6  | 0 | 1.166118  | -0.967055 | -0.843724 |
| 22 | 1  | 0 | 0.726698  | -1.872082 | -1.276857 |
| 23 | 14 | 0 | 2.976275  | -1.337405 | -0.589112 |
| 24 | 6  | 0 | 3.493803  | -2.384409 | -2.078788 |
| 25 | 1  | 0 | 3.370048  | -1.828223 | -3.015132 |
| 26 | 1  | 0 | 4.544881  | -2.688676 | -2.002745 |
| 27 | 1  | 0 | 2.889324  | -3.296357 | -2.153228 |
| 28 | 6  | 0 | 4.165906  | 0.134508  | -0.546519 |
| 29 | 1  | 0 | 4.171512  | 0.685043  | 0.400023  |
| 30 | 1  | 0 | 5.183824  | -0.243862 | -0.701822 |
| 31 | 1  | 0 | 3.954084  | 0.843173  | -1.355329 |
| 32 | 6  | 0 | 3.249823  | -2.410971 | 0.943583  |
| 33 | 1  | 0 | 3.183970  | -1.849065 | 1.881351  |
| 34 | 1  | 0 | 2.496387  | -3.206268 | 0.983202  |
| 35 | 1  | 0 | 4.237569  | -2.886054 | 0.910864  |
| 36 | 6  | 0 | -4.624246 | -1.578576 | -0.745926 |
| 37 | 6  | 0 | -4.616751 | -0.248496 | -0.868303 |
| 38 | 6  | 0 | -3.477454 | 0.741821  | -0.760439 |
| 39 | 6  | 0 | -3.023240 | 0.959251  | 0.689448  |
| 40 | 6  | 0 | -2.147696 | -0.098948 | 1.312436  |
| 41 | 6  | 0 | -1.753087 | -1.336144 | 0.840437  |
| 42 | 6  | 0 | -2.078488 | -2.022883 | -0.468992 |
| 43 | 6  | 0 | -3.509115 | -2.568367 | -0.544688 |
| 44 | 1  | 0 | -5.602345 | -2.055995 | -0.817720 |
| 45 | 1  | 0 | -5.591891 | 0.216472  | -1.010994 |
| 46 | 1  | 0 | -3.828844 | 1.702777  | -1.152608 |
| 47 | 1  | 0 | -2.621338 | 0.466010  | -1.381350 |
| 48 | 1  | 0 | -2.514672 | 1.927287  | 0.779300  |
| 49 | 1  | 0 | -3.921838 | 1.048200  | 1.316604  |
| 50 | 1  | 0 | -2.057113 | 0.036786  | 2.388822  |
| 51 | 1  | 0 | -1.414564 | -2.031881 | 1.607286  |
| 52 | 1  | 0 | -1.386901 | -2.866243 | -0.569296 |
| 53 | 1  | 0 | -1.894507 | -1.388383 | -1.336325 |
| 54 | 1  | 0 | -3.560262 | -3.293691 | -1.369849 |
| 55 | 1  | 0 | -3.724450 | -3.150535 | 0.363329  |

-----  
Zero-point correction= 0.481506 (Hartree/Particle)

Thermal correction to Energy= 0.507580

Thermal correction to Enthalpy= 0.508524

Thermal correction to Gibbs Free Energy= 0.427893

Sum of electronic and zero-point Energies= -1314.572456

Sum of electronic and thermal Energies= -1314.546381

Sum of electronic and thermal Enthalpies= -1314.545437

Sum of electronic and thermal Free Energies= -1314.626068

ωB97XD /6-311++G(d,p)-SDD/SMD//ωB97XD /6-31G(d)-LANL2DZ energy in tetrahydrofuran solvent = -1316.9713836

### TS6a

-----

| Center Number | Atomic Number | Atomic Type | Coordinates (Angstroms) |          |           |
|---------------|---------------|-------------|-------------------------|----------|-----------|
|               |               |             | X                       | Y        | Z         |
| 1             | 6             | 0           | 0.889625                | 1.566268 | -0.602956 |
| 2             | 6             | 0           | 0.426590                | 0.319910 | -1.143553 |
| 3             | 1             | 0           | -0.472655               | 0.435060 | -1.750855 |
| 4             | 6             | 0           | 0.337769                | 2.914337 | -1.034406 |
| 5             | 1             | 0           | -0.235321               | 2.854573 | -1.963299 |
| 6             | 1             | 0           | -0.298461               | 3.372807 | -0.259586 |
| 7             | 8             | 0           | 1.477010                | 3.719221 | -1.264497 |

-----

|    |    |   |           |           |           |
|----|----|---|-----------|-----------|-----------|
| 8  | 6  | 0 | 2.447084  | 3.365292  | -0.294334 |
| 9  | 1  | 0 | 2.361607  | 4.009726  | 0.594212  |
| 10 | 1  | 0 | 3.433521  | 3.516316  | -0.739188 |
| 11 | 6  | 0 | 2.187724  | 1.895817  | 0.063977  |
| 12 | 6  | 0 | 1.373361  | 1.604821  | 1.275307  |
| 13 | 1  | 0 | 3.018378  | 1.217588  | -0.106920 |
| 14 | 1  | 0 | 0.830761  | 2.433562  | 1.725781  |
| 15 | 6  | 0 | 1.467263  | 0.343654  | 1.961482  |
| 16 | 6  | 0 | 0.429613  | -0.108296 | 2.785440  |
| 17 | 1  | 0 | 2.316920  | -0.297449 | 1.753952  |
| 18 | 1  | 0 | 0.518577  | -1.081885 | 3.261103  |
| 19 | 1  | 0 | -0.230097 | 0.597786  | 3.286808  |
| 20 | 28 | 0 | -0.139461 | 0.079927  | 0.825352  |
| 21 | 6  | 0 | 0.880455  | -0.980583 | -0.916079 |
| 22 | 1  | 0 | 0.197534  | -1.700347 | -1.379720 |
| 23 | 14 | 0 | 2.436034  | -1.948365 | -0.572801 |
| 24 | 6  | 0 | 2.688183  | -3.053308 | -2.088591 |
| 25 | 1  | 0 | 2.911247  | -2.456855 | -2.980855 |
| 26 | 1  | 0 | 3.517336  | -3.754702 | -1.935482 |
| 27 | 1  | 0 | 1.789503  | -3.644061 | -2.302476 |
| 28 | 6  | 0 | 4.077700  | -1.035560 | -0.331764 |
| 29 | 1  | 0 | 4.175506  | -0.505500 | 0.621243  |
| 30 | 1  | 0 | 4.877966  | -1.785640 | -0.361821 |
| 31 | 1  | 0 | 4.271338  | -0.325801 | -1.144285 |
| 32 | 6  | 0 | 2.143895  | -3.095438 | 0.900577  |
| 33 | 1  | 0 | 2.069044  | -2.550738 | 1.847691  |
| 34 | 1  | 0 | 1.200715  | -3.638001 | 0.764828  |
| 35 | 1  | 0 | 2.946987  | -3.836080 | 0.995656  |
| 36 | 6  | 0 | -4.856833 | -1.127238 | -0.432456 |
| 37 | 6  | 0 | -4.759478 | 0.140122  | -0.841205 |
| 38 | 6  | 0 | -3.531066 | 0.937017  | -1.212602 |
| 39 | 6  | 0 | -2.805496 | 1.532047  | 0.005878  |
| 40 | 6  | 0 | -2.196127 | 0.572720  | 1.011093  |
| 41 | 6  | 0 | -2.008711 | -0.795676 | 0.920756  |
| 42 | 6  | 0 | -2.330132 | -1.722399 | -0.228344 |
| 43 | 6  | 0 | -3.796203 | -2.178193 | -0.235919 |
| 44 | 1  | 0 | -5.862236 | -1.484511 | -0.207408 |
| 45 | 1  | 0 | -5.691619 | 0.703052  | -0.886501 |
| 46 | 1  | 0 | -3.846558 | 1.776099  | -1.844024 |
| 47 | 1  | 0 | -2.839813 | 0.354456  | -1.825286 |
| 48 | 1  | 0 | -2.050013 | 2.239916  | -0.349876 |
| 49 | 1  | 0 | -3.534261 | 2.143537  | 0.555495  |
| 50 | 1  | 0 | -2.184242 | 0.977766  | 2.022346  |
| 51 | 1  | 0 | -1.905220 | -1.318434 | 1.871293  |
| 52 | 1  | 0 | -1.700089 | -2.612938 | -0.122691 |
| 53 | 1  | 0 | -2.065541 | -1.287643 | -1.192568 |
| 54 | 1  | 0 | -3.922181 | -2.949135 | -1.010875 |
| 55 | 1  | 0 | -4.005581 | -2.689028 | 0.714836  |

-----  
Zero-point correction= 0.481065 (Hartree/Particle)

Thermal correction to Energy= 0.506589

Thermal correction to Enthalpy= 0.507533

Thermal correction to Gibbs Free Energy= 0.427880

Sum of electronic and zero-point Energies= -1314.571429

Sum of electronic and thermal Energies= -1314.545905

Sum of electronic and thermal Enthalpies= -1314.544961

Sum of electronic and thermal Free Energies= -1314.624613

ωB97XD /6-311++G(d,p)-SDD/SMD//ωB97XD /6-31G(d)-LANL2DZ energy in tetrahydrofuran solvent = -1316.9680168

## INT12a

| Center<br>Number | Atomic<br>Number | Atomic<br>Type | Coordinates (Angstroms) |          |           |
|------------------|------------------|----------------|-------------------------|----------|-----------|
|                  |                  |                | X                       | Y        | Z         |
| 1                | 6                | 0              | 1.530020                | 1.538049 | -0.641587 |
| 2                | 6                | 0              | 0.768791                | 0.346325 | -1.109106 |
| 3                | 1                | 0              | 0.014004                | 0.622396 | -1.848708 |

|    |    |   |           |           |           |
|----|----|---|-----------|-----------|-----------|
| 4  | 6  | 0 | 1.432631  | 2.814077  | -1.463523 |
| 5  | 1  | 0 | 1.596289  | 2.584782  | -2.530048 |
| 6  | 1  | 0 | 0.473574  | 3.333238  | -1.360034 |
| 7  | 8  | 0 | 2.437458  | 3.673667  | -0.963912 |
| 8  | 6  | 0 | 3.521312  | 2.869934  | -0.524799 |
| 9  | 1  | 0 | 4.061157  | 3.442203  | 0.235515  |
| 10 | 1  | 0 | 4.210081  | 2.643353  | -1.354127 |
| 11 | 6  | 0 | 2.896724  | 1.588860  | -0.007865 |
| 12 | 6  | 0 | 1.687162  | 1.759796  | 0.861350  |
| 13 | 1  | 0 | 3.511471  | 0.703826  | 0.086681  |
| 14 | 1  | 0 | 1.472469  | 2.762708  | 1.230771  |
| 15 | 6  | 0 | 1.238924  | 0.610903  | 1.711896  |
| 16 | 6  | 0 | 0.078839  | 0.644007  | 2.467889  |
| 17 | 1  | 0 | 1.977569  | -0.156483 | 1.934649  |
| 18 | 1  | 0 | -0.080673 | -0.090517 | 3.253719  |
| 19 | 1  | 0 | -0.513851 | 1.552866  | 2.549089  |
| 20 | 28 | 0 | -0.303695 | -0.174159 | 0.621018  |
| 21 | 6  | 0 | 0.941805  | -1.009545 | -0.911248 |
| 22 | 1  | 0 | 0.237523  | -1.587123 | -1.520968 |
| 23 | 14 | 0 | 2.117850  | -2.267048 | -0.154115 |
| 24 | 6  | 0 | 2.338733  | -3.571253 | -1.504093 |
| 25 | 1  | 0 | 2.819483  | -3.145441 | -2.392389 |
| 26 | 1  | 0 | 2.962099  | -4.400905 | -1.150310 |
| 27 | 1  | 0 | 1.375028  | -3.990508 | -1.816126 |
| 28 | 6  | 0 | 3.854409  | -1.745077 | 0.372495  |
| 29 | 1  | 0 | 3.881948  | -1.089891 | 1.248429  |
| 30 | 1  | 0 | 4.404748  | -2.657472 | 0.635016  |
| 31 | 1  | 0 | 4.401905  | -1.260557 | -0.443606 |
| 32 | 6  | 0 | 1.249880  | -3.084587 | 1.309309  |
| 33 | 1  | 0 | 1.126862  | -2.395004 | 2.151104  |
| 34 | 1  | 0 | 0.249952  | -3.427422 | 1.018783  |
| 35 | 1  | 0 | 1.815012  | -3.955788 | 1.662027  |
| 36 | 6  | 0 | -4.989829 | -0.656534 | -0.794608 |
| 37 | 6  | 0 | -5.103399 | 0.312323  | 0.116769  |
| 38 | 6  | 0 | -4.162463 | 1.473125  | 0.299748  |
| 39 | 6  | 0 | -2.929062 | 1.188432  | 1.200800  |
| 40 | 6  | 0 | -2.304612 | -0.196569 | 1.080565  |
| 41 | 6  | 0 | -2.057672 | -0.873020 | -0.108838 |
| 42 | 6  | 0 | -2.480251 | -0.390064 | -1.474039 |
| 43 | 6  | 0 | -3.910446 | -0.851547 | -1.836791 |
| 44 | 1  | 0 | -5.766373 | -1.420644 | -0.804642 |
| 45 | 1  | 0 | -5.947132 | 0.261730  | 0.803911  |
| 46 | 1  | 0 | -4.708060 | 2.316027  | 0.739941  |
| 47 | 1  | 0 | -3.823419 | 1.823393  | -0.679493 |
| 48 | 1  | 0 | -2.192826 | 1.974555  | 0.991572  |
| 49 | 1  | 0 | -3.218629 | 1.326040  | 2.248633  |
| 50 | 1  | 0 | -2.379667 | -0.806090 | 1.979022  |
| 51 | 1  | 0 | -1.940131 | -1.957432 | -0.034733 |
| 52 | 1  | 0 | -1.802361 | -0.790953 | -2.240235 |
| 53 | 1  | 0 | -2.394246 | 0.697869  | -1.539451 |
| 54 | 1  | 0 | -4.212801 | -0.367788 | -2.777524 |
| 55 | 1  | 0 | -3.866078 | -1.925019 | -2.062025 |

-----  
Zero-point correction= 0.481738 (Hartree/Particle)  
Thermal correction to Energy= 0.507683  
Thermal correction to Enthalpy= 0.508627  
Thermal correction to Gibbs Free Energy= 0.427146  
Sum of electronic and zero-point Energies= -1314.592007  
Sum of electronic and thermal Energies= -1314.566062  
Sum of electronic and thermal Enthalpies= -1314.565118  
Sum of electronic and thermal Free Energies= -1314.646600  
 $\omega$ B97XD /6-311++G(d,p)-SDD/SMD// $\omega$ B97XD /6-31G(d)-LANL2DZ energy in tetrahydrofuran solvent = -1316.9840196

### INT13a

-----  
Center Atomic Atomic Coordinates (Angstroms)  
Number Number Type X Y Z



|    |    |   |           |           |           |
|----|----|---|-----------|-----------|-----------|
| 1  | 6  | 0 | -1.434457 | -0.407150 | 0.312928  |
| 2  | 6  | 0 | 0.027836  | -0.289237 | 0.541734  |
| 3  | 1  | 0 | 0.307214  | -0.160867 | 1.589714  |
| 4  | 6  | 0 | -2.183789 | -1.541121 | 1.007512  |
| 5  | 1  | 0 | -1.593215 | -2.467933 | 0.927730  |
| 6  | 1  | 0 | -2.403201 | -1.351355 | 2.062975  |
| 7  | 8  | 0 | -3.420988 | -1.662728 | 0.329601  |
| 8  | 6  | 0 | -3.210709 | -1.309728 | -1.029263 |
| 9  | 1  | 0 | -4.170699 | -0.968791 | -1.427975 |
| 10 | 1  | 0 | -2.869620 | -2.177086 | -1.616517 |
| 11 | 6  | 0 | -2.133740 | -0.244772 | -1.003073 |
| 12 | 6  | 0 | -2.306877 | 0.821162  | 0.059202  |
| 13 | 1  | 0 | -1.598720 | -0.003823 | -1.916516 |
| 14 | 1  | 0 | -3.267061 | 0.830906  | 0.573674  |
| 15 | 6  | 0 | -1.684566 | 2.147261  | -0.132992 |
| 16 | 6  | 0 | -2.235465 | 3.294813  | 0.257725  |
| 17 | 1  | 0 | -0.713464 | 2.159303  | -0.626494 |
| 18 | 1  | 0 | -1.741229 | 4.246964  | 0.091594  |
| 19 | 1  | 0 | -3.201483 | 3.323935  | 0.756484  |
| 20 | 6  | 0 | 0.981613  | -0.315236 | -0.396424 |
| 21 | 1  | 0 | 0.657153  | -0.451491 | -1.431853 |
| 22 | 14 | 0 | 2.814295  | -0.113343 | -0.056298 |
| 23 | 6  | 0 | 3.096502  | 0.085217  | 1.795993  |
| 24 | 1  | 0 | 2.746853  | -0.790910 | 2.353444  |
| 25 | 1  | 0 | 4.164483  | 0.208835  | 2.008339  |
| 26 | 1  | 0 | 2.577028  | 0.965660  | 2.190290  |
| 27 | 6  | 0 | 3.738152  | -1.630845 | -0.688522 |
| 28 | 1  | 0 | 3.568496  | -1.782726 | -1.760519 |
| 29 | 1  | 0 | 4.818240  | -1.523640 | -0.535352 |
| 30 | 1  | 0 | 3.413145  | -2.538107 | -0.167648 |
| 31 | 6  | 0 | 3.439085  | 1.416274  | -0.966292 |
| 32 | 1  | 0 | 3.270082  | 1.332974  | -2.045939 |
| 33 | 1  | 0 | 2.927593  | 2.319845  | -0.616511 |
| 34 | 1  | 0 | 4.514670  | 1.557116  | -0.808724 |

Zero-point correction= 0.294838 (Hartree/Particle)  
 Thermal correction to Energy= 0.311987  
 Thermal correction to Enthalpy= 0.312931  
 Thermal correction to Gibbs Free Energy= 0.249483  
 Sum of electronic and zero-point Energies= -833.514891  
 Sum of electronic and thermal Energies= -833.497742  
 Sum of electronic and thermal Enthalpies= -833.496798  
 Sum of electronic and thermal Free Energies= -833.560246  
 ωB97XD /6-311++G(d,p)-SDD/SMD//ωB97XD /6-31G(d)-LANL2DZ energy in tetrahydrofuran solvent = -833.9878097

#### TS4a

| Center Number | Atomic Number | Atomic Type | Coordinates (Angstroms) |           |           |
|---------------|---------------|-------------|-------------------------|-----------|-----------|
|               |               |             | X                       | Y         | Z         |
| 1             | 6             | 0           | 1.590587                | -0.607482 | 0.059021  |
| 2             | 6             | 0           | 0.228276                | -0.835397 | 0.221240  |
| 3             | 1             | 0           | -0.059649               | -1.440324 | 1.083910  |
| 4             | 6             | 0           | 2.716348                | -1.461850 | 0.607126  |
| 5             | 1             | 0           | 2.721684                | -1.562004 | 1.696857  |
| 6             | 1             | 0           | 2.651134                | -2.469447 | 0.166267  |
| 7             | 8             | 0           | 3.922349                | -0.825813 | 0.219546  |
| 8             | 6             | 0           | 3.661700                | -0.080469 | -0.959153 |
| 9             | 1             | 0           | 3.730305                | -0.717885 | -1.854464 |
| 10            | 1             | 0           | 4.415661                | 0.708521  | -1.022435 |
| 11            | 6             | 0           | 2.238520                | 0.435342  | -0.796106 |
| 12            | 6             | 0           | 2.031519                | 1.244239  | 0.443070  |
| 13            | 1             | 0           | 1.742610                | 0.763126  | -1.709683 |
| 14            | 1             | 0           | 2.846893                | 1.216580  | 1.160389  |
| 15            | 6             | 0           | 0.893754                | 1.990868  | 0.738629  |
| 16            | 6             | 0           | -0.210502               | 2.071176  | -0.093883 |

|    |    |   |           |           |           |
|----|----|---|-----------|-----------|-----------|
| 17 | 1  | 0 | 0.789466  | 2.324657  | 1.769484  |
| 18 | 1  | 0 | -1.101215 | 2.580688  | 0.264511  |
| 19 | 1  | 0 | -0.076864 | 2.112873  | -1.168049 |
| 20 | 6  | 0 | -0.743821 | -0.114374 | -0.468640 |
| 21 | 1  | 0 | -0.486436 | 0.147387  | -1.492394 |
| 22 | 14 | 0 | -2.569267 | -0.274717 | -0.071530 |
| 23 | 6  | 0 | -2.835137 | 0.072285  | 1.762481  |
| 24 | 1  | 0 | -2.552863 | 1.101225  | 2.010842  |
| 25 | 1  | 0 | -3.883832 | -0.070293 | 2.046824  |
| 26 | 1  | 0 | -2.227992 | -0.595713 | 2.384292  |
| 27 | 6  | 0 | -3.166027 | -2.022935 | -0.465164 |
| 28 | 1  | 0 | -4.232409 | -2.143319 | -0.240758 |
| 29 | 1  | 0 | -3.017354 | -2.259703 | -1.524659 |
| 30 | 1  | 0 | -2.613571 | -2.766403 | 0.120542  |
| 31 | 6  | 0 | -3.540362 | 0.956438  | -1.119001 |
| 32 | 1  | 0 | -3.359554 | 0.792824  | -2.187772 |
| 33 | 1  | 0 | -4.617590 | 0.850750  | -0.947343 |
| 34 | 1  | 0 | -3.266597 | 1.991952  | -0.889041 |

-----  
Zero-point correction= 0.294430 (Hartree/Particle)

Thermal correction to Energy= 0.310356

Thermal correction to Enthalpy= 0.311300

Thermal correction to Gibbs Free Energy= 0.251963

Sum of electronic and zero-point Energies= -833.480281

Sum of electronic and thermal Energies= -833.464355

Sum of electronic and thermal Enthalpies= -833.463411

Sum of electronic and thermal Free Energies= -833.522748

ωB97XD /6-311++G(d,p)-SDD/SMD//ωB97XD /6-31G(d)-LANL2DZ energy in tetrahydrofuran solvent = -833.9537613

#### TS4a'

| Center Number | Atomic Number | Atomic Type | Coordinates (Angstroms) |           |           |
|---------------|---------------|-------------|-------------------------|-----------|-----------|
|               |               |             | X                       | Y         | Z         |
| 1             | 6             | 0           | -1.595746               | -0.506847 | 0.130384  |
| 2             | 6             | 0           | -0.233226               | -0.571454 | 0.462357  |
| 3             | 1             | 0           | -0.027682               | -0.422036 | 1.526906  |
| 4             | 6             | 0           | -2.460150               | -1.326424 | -0.805775 |
| 5             | 1             | 0           | -2.239572               | -1.211944 | -1.871820 |
| 6             | 1             | 0           | -2.357914               | -2.389434 | -0.542457 |
| 7             | 8             | 0           | -3.794680               | -0.884999 | -0.587817 |
| 8             | 6             | 0           | -3.883091               | -0.269293 | 0.692661  |
| 9             | 1             | 0           | -4.093839               | -1.011612 | 1.477257  |
| 10            | 1             | 0           | -4.705840               | 0.450342  | 0.649453  |
| 11            | 6             | 0           | -2.514194               | 0.351517  | 0.918760  |
| 12            | 6             | 0           | -2.119159               | 1.253553  | -0.233359 |
| 13            | 1             | 0           | -2.231887               | 0.641044  | 1.930894  |
| 14            | 1             | 0           | -2.899397               | 1.298928  | -0.991199 |
| 15            | 6             | 0           | -0.971741               | 1.987920  | -0.549912 |
| 16            | 6             | 0           | 0.321070                | 1.874350  | -0.009209 |
| 17            | 1             | 0           | -1.039627               | 2.497400  | -1.509566 |
| 18            | 1             | 0           | 1.082304                | 2.500691  | -0.473873 |
| 19            | 1             | 0           | 0.460971                | 1.778028  | 1.062732  |
| 20            | 6             | 0           | 0.762609                | -0.071206 | -0.394663 |
| 21            | 1             | 0           | 0.521445                | -0.105965 | -1.461293 |
| 22            | 14            | 0           | 2.596954                | -0.267385 | 0.000776  |
| 23            | 6             | 0           | 2.887621                | 0.050207  | 1.836275  |
| 24            | 1             | 0           | 3.943270                | -0.101554 | 2.088526  |
| 25            | 1             | 0           | 2.625797                | 1.077710  | 2.113025  |
| 26            | 1             | 0           | 2.297223                | -0.628893 | 2.461068  |
| 27            | 6             | 0           | 3.619327                | 0.939033  | -1.026960 |
| 28            | 1             | 0           | 4.690257                | 0.755885  | -0.881927 |
| 29            | 1             | 0           | 3.407360                | 0.827646  | -2.096535 |
| 30            | 1             | 0           | 3.422860                | 1.981188  | -0.753318 |
| 31            | 6             | 0           | 3.106078                | -2.030685 | -0.431850 |
| 32            | 1             | 0           | 2.935772                | -2.241611 | -1.493704 |
| 33            | 1             | 0           | 4.168544                | -2.202411 | -0.223566 |

34 1 0 2.523635 -2.754046 0.148814

-----  
Zero-point correction= 0.294866 (Hartree/Particle)  
Thermal correction to Energy= 0.310583  
Thermal correction to Enthalpy= 0.311527  
Thermal correction to Gibbs Free Energy= 0.252664  
Sum of electronic and zero-point Energies= -833.450476  
Sum of electronic and thermal Energies= -833.434759  
Sum of electronic and thermal Enthalpies= -833.433815  
Sum of electronic and thermal Free Energies= -833.492679  
ωB97XD /6-311++G(d,p)-SDD/SMD//ωB97XD /6-31G(d)-LANL2DZ energy in tetrahydrofuran solvent = -833.9234757

### TS7a

-----

| Center Number | Atomic Number | Atomic Type | Coordinates (Angstroms) |           |           |
|---------------|---------------|-------------|-------------------------|-----------|-----------|
|               |               |             | X                       | Y         | Z         |
| 1             | 6             | 0           | -1.613785               | -0.534229 | -0.124641 |
| 2             | 6             | 0           | -0.237398               | -0.691739 | 0.014371  |
| 3             | 1             | 0           | 0.034859                | -1.451464 | 0.749969  |
| 4             | 6             | 0           | -2.585556               | -1.463268 | 0.592628  |
| 5             | 1             | 0           | -2.554459               | -2.454942 | 0.111563  |
| 6             | 1             | 0           | -2.376250               | -1.592497 | 1.659071  |
| 7             | 8             | 0           | -3.871227               | -0.886623 | 0.471925  |
| 8             | 6             | 0           | -3.889108               | -0.126757 | -0.723454 |
| 9             | 1             | 0           | -4.678065               | 0.623566  | -0.630839 |
| 10            | 1             | 0           | -4.099657               | -0.766165 | -1.595583 |
| 11            | 6             | 0           | -2.494393               | 0.466879  | -0.833571 |
| 12            | 6             | 0           | -2.002857               | 1.309394  | 0.293965  |
| 13            | 1             | 0           | -2.185717               | 0.810110  | -1.821986 |
| 14            | 1             | 0           | -2.398632               | 1.133593  | 1.289221  |
| 15            | 6             | 0           | -0.894105               | 2.120590  | 0.046049  |
| 16            | 6             | 0           | 0.310819                | 1.937519  | 0.715784  |
| 17            | 1             | 0           | -0.810066               | 2.525084  | -0.965271 |
| 18            | 1             | 0           | 1.165151                | 2.571052  | 0.488609  |
| 19            | 1             | 0           | 0.310463                | 1.515647  | 1.718800  |
| 20            | 6             | 0           | 0.784437                | 0.182045  | -0.400798 |
| 21            | 1             | 0           | 0.617902                | 0.719100  | -1.333563 |
| 22            | 14            | 0           | 2.582689                | -0.274990 | -0.094390 |
| 23            | 6             | 0           | 2.722089                | -1.261120 | 1.508095  |
| 24            | 1             | 0           | 2.228144                | -2.236063 | 1.430016  |
| 25            | 1             | 0           | 3.774162                | -1.445202 | 1.753903  |
| 26            | 1             | 0           | 2.272434                | -0.723727 | 2.350810  |
| 27            | 6             | 0           | 3.232188                | -1.311465 | -1.531847 |
| 28            | 1             | 0           | 3.143125                | -0.773018 | -2.482273 |
| 29            | 1             | 0           | 4.289797                | -1.563376 | -1.389827 |
| 30            | 1             | 0           | 2.671692                | -2.247938 | -1.627205 |
| 31            | 6             | 0           | 3.637114                | 1.284038  | 0.045839  |
| 32            | 1             | 0           | 3.458318                | 1.968794  | -0.791423 |
| 33            | 1             | 0           | 3.428616                | 1.827592  | 0.973988  |
| 34            | 1             | 0           | 4.703695                | 1.031377  | 0.043558  |

-----

Zero-point correction= 0.294267 (Hartree/Particle)  
Thermal correction to Energy= 0.310175  
Thermal correction to Enthalpy= 0.311119  
Thermal correction to Gibbs Free Energy= 0.251417  
Sum of electronic and zero-point Energies= -833.462217  
Sum of electronic and thermal Energies= -833.446310  
Sum of electronic and thermal Enthalpies= -833.445365  
Sum of electronic and thermal Free Energies= -833.505067  
ωB97XD /6-311++G(d,p)-SDD/SMD//ωB97XD /6-31G(d)-LANL2DZ energy in tetrahydrofuran solvent = -833.9356163

### TS7a'

-----

| Center Number | Atomic Number | Atomic Type | Coordinates (Angstroms) |   |   |
|---------------|---------------|-------------|-------------------------|---|---|
|               |               |             | X                       | Y | Z |

-----

|    |    |   |           |           |           |
|----|----|---|-----------|-----------|-----------|
| 1  | 6  | 0 | 1.465842  | -0.378869 | -0.504746 |
| 2  | 6  | 0 | 0.362470  | -0.352286 | -1.367066 |
| 3  | 1  | 0 | 0.661768  | -0.513058 | -2.405508 |
| 4  | 6  | 0 | 2.830231  | -0.772755 | -1.068128 |
| 5  | 1  | 0 | 2.830672  | -1.855623 | -1.276629 |
| 6  | 1  | 0 | 3.100093  | -0.245077 | -1.988298 |
| 7  | 8  | 0 | 3.795736  | -0.450692 | -0.088273 |
| 8  | 6  | 0 | 3.163786  | -0.540508 | 1.175498  |
| 9  | 1  | 0 | 3.731640  | 0.075535  | 1.877173  |
| 10 | 1  | 0 | 3.149356  | -1.580554 | 1.538885  |
| 11 | 6  | 0 | 1.745629  | -0.049438 | 0.944507  |
| 12 | 6  | 0 | 1.563633  | 1.300244  | 0.347790  |
| 13 | 1  | 0 | 1.010982  | -0.323047 | 1.697216  |
| 14 | 1  | 0 | 2.367476  | 1.731711  | -0.240101 |
| 15 | 6  | 0 | 0.295977  | 1.890966  | 0.458560  |
| 16 | 6  | 0 | -0.442415 | 2.208387  | -0.669686 |
| 17 | 1  | 0 | -0.274119 | 1.654713  | 1.359329  |
| 18 | 1  | 0 | -1.433809 | 2.645911  | -0.584419 |
| 19 | 1  | 0 | 0.074586  | 2.433934  | -1.599634 |
| 20 | 6  | 0 | -0.930830 | 0.167728  | -1.184953 |
| 21 | 1  | 0 | -1.446960 | 0.275241  | -2.147080 |
| 22 | 14 | 0 | -2.200826 | -0.366275 | 0.099536  |
| 23 | 6  | 0 | -3.291416 | -1.633814 | -0.780065 |
| 24 | 1  | 0 | -2.703293 | -2.500048 | -1.103560 |
| 25 | 1  | 0 | -4.088142 | -1.995370 | -0.119337 |
| 26 | 1  | 0 | -3.766027 | -1.204079 | -1.669826 |
| 27 | 6  | 0 | -1.477084 | -1.200141 | 1.629083  |
| 28 | 1  | 0 | -1.058744 | -0.481752 | 2.341684  |
| 29 | 1  | 0 | -2.272799 | -1.746648 | 2.149303  |
| 30 | 1  | 0 | -0.697256 | -1.921274 | 1.362143  |
| 31 | 6  | 0 | -3.303577 | 1.062976  | 0.653373  |
| 32 | 1  | 0 | -2.759440 | 1.800938  | 1.252919  |
| 33 | 1  | 0 | -3.745217 | 1.583965  | -0.203937 |
| 34 | 1  | 0 | -4.128567 | 0.683021  | 1.267353  |

-----  
Zero-point correction= 0.294853 (Hartree/Particle)  
Thermal correction to Energy= 0.310251  
Thermal correction to Enthalpy= 0.311195  
Thermal correction to Gibbs Free Energy= 0.254026  
Sum of electronic and zero-point Energies= -833.455724  
Sum of electronic and thermal Energies= -833.440326  
Sum of electronic and thermal Enthalpies= -833.439382  
Sum of electronic and thermal Free Energies= -833.496552  
ωB97XD /6-311++G(d,p)-SDD/SMD//ωB97XD /6-31G(d)-LANL2DZ energy in tetrahydrofuran solvent = -833.9293972

### TS8a

-----

| Center<br>Number | Atomic<br>Number | Atomic<br>Type | Coordinates (Angstroms) |           |           |
|------------------|------------------|----------------|-------------------------|-----------|-----------|
|                  |                  |                | X                       | Y         | Z         |
| 1                | 6                | 0              | -3.258636               | -1.403317 | -0.981390 |
| 2                | 6                | 0              | -2.654509               | -2.565237 | -0.724344 |
| 3                | 6                | 0              | -2.506567               | -3.195872 | 0.632134  |
| 4                | 6                | 0              | -1.242250               | -2.758075 | 1.405855  |
| 5                | 6                | 0              | -0.887579               | -1.284106 | 1.451432  |
| 6                | 6                | 0              | -1.772790               | -0.216159 | 1.483460  |
| 7                | 6                | 0              | -3.291237               | -0.335943 | 1.405294  |
| 8                | 6                | 0              | -3.920770               | -0.465711 | 0.000355  |
| 9                | 1                | 0              | -3.274631               | -1.067983 | -2.016956 |
| 10               | 1                | 0              | -2.184809               | -3.084958 | -1.557807 |
| 11               | 1                | 0              | -2.459769               | -4.285664 | 0.520090  |
| 12               | 1                | 0              | -3.399053               | -3.000076 | 1.231812  |
| 13               | 1                | 0              | -1.351138               | -3.104881 | 2.445033  |
| 14               | 1                | 0              | -0.383352               | -3.306055 | 1.009254  |
| 15               | 1                | 0              | 0.102184                | -1.104835 | 1.873972  |
| 16               | 1                | 0              | -1.407611               | 0.699161  | 1.951810  |
| 17               | 1                | 0              | -3.732895               | 0.549327  | 1.874933  |

|    |    |   |           |           |           |
|----|----|---|-----------|-----------|-----------|
| 18 | 1  | 0 | -3.611227 | -1.171406 | 2.035797  |
| 19 | 1  | 0 | -4.979078 | -0.739701 | 0.123453  |
| 20 | 1  | 0 | -3.929515 | 0.527139  | -0.463855 |
| 21 | 6  | 0 | 0.520248  | -1.347117 | -1.121960 |
| 22 | 6  | 0 | 0.261161  | -0.386321 | -1.902396 |
| 23 | 1  | 0 | 0.415013  | 0.122721  | -2.839261 |
| 24 | 6  | 0 | 1.280608  | -2.584481 | -0.828183 |
| 25 | 1  | 0 | 1.556230  | -2.597772 | 0.236366  |
| 26 | 1  | 0 | 0.647064  | -3.457052 | -1.018147 |
| 27 | 8  | 0 | 2.428227  | -2.774536 | -1.631714 |
| 28 | 6  | 0 | 3.405438  | -1.759996 | -1.486029 |
| 29 | 1  | 0 | 3.014131  | -0.795130 | -1.838173 |
| 30 | 1  | 0 | 4.219446  | -2.060284 | -2.153920 |
| 31 | 6  | 0 | 3.902335  | -1.626968 | -0.074847 |
| 32 | 6  | 0 | 3.772566  | -0.517674 | 0.661466  |
| 33 | 1  | 0 | 4.366149  | -2.513723 | 0.358543  |
| 34 | 1  | 0 | 3.289051  | 0.357923  | 0.225777  |
| 35 | 6  | 0 | 4.241093  | -0.390417 | 2.038689  |
| 36 | 6  | 0 | 4.127747  | 0.723394  | 2.767565  |
| 37 | 1  | 0 | 4.706309  | -1.273825 | 2.475328  |
| 38 | 1  | 0 | 4.487767  | 0.774622  | 3.790283  |
| 39 | 1  | 0 | 3.669942  | 1.621884  | 2.361485  |
| 40 | 28 | 0 | -0.746315 | -0.122690 | -0.293038 |
| 41 | 6  | 0 | -1.028502 | 1.634954  | -0.891535 |
| 42 | 7  | 0 | -2.256995 | 2.522071  | 0.042262  |
| 43 | 7  | 0 | -2.737801 | 2.802196  | 1.003954  |
| 44 | 1  | 0 | -1.499584 | 1.815838  | -1.865968 |
| 45 | 14 | 0 | 0.444171  | 2.809596  | -0.520143 |
| 46 | 6  | 0 | -0.031504 | 4.632035  | -0.689651 |
| 47 | 1  | 0 | -0.763512 | 4.946923  | 0.062271  |
| 48 | 1  | 0 | 0.854469  | 5.266806  | -0.568465 |
| 49 | 1  | 0 | -0.455610 | 4.840682  | -1.678733 |
| 50 | 6  | 0 | 1.017895  | 2.483782  | 1.242228  |
| 51 | 1  | 0 | 1.312991  | 1.436107  | 1.367234  |
| 52 | 1  | 0 | 1.871671  | 3.121335  | 1.501944  |
| 53 | 1  | 0 | 0.222454  | 2.691084  | 1.968238  |
| 54 | 6  | 0 | 1.825675  | 2.464209  | -1.751364 |
| 55 | 1  | 0 | 2.221421  | 1.450699  | -1.644007 |
| 56 | 1  | 0 | 1.484880  | 2.587465  | -2.785744 |
| 57 | 1  | 0 | 2.644257  | 3.175144  | -1.586001 |

-----  
Zero-point correction= 0.482867 (Hartree/Particle)

Thermal correction to Energy= 0.513719

Thermal correction to Enthalpy= 0.514663

Thermal correction to Gibbs Free Energy= 0.421337

Sum of electronic and zero-point Energies= -1423.918480

Sum of electronic and thermal Energies= -1423.887627

Sum of electronic and thermal Enthalpies= -1423.886683

Sum of electronic and thermal Free Energies= -1423.980009

ωB97XD /6-311++G(d,p)-SDD/SMD//ωB97XD /6-31G(d)-LANL2DZ energy in tetrahydrofuran solvent = -1426.3545236

#### INT14a

| Center<br>Number | Atomic<br>Number | Atomic<br>Type | Coordinates (Angstroms) |           |           |
|------------------|------------------|----------------|-------------------------|-----------|-----------|
|                  |                  |                | X                       | Y         | Z         |
| 1                | 6                | 0              | -0.372381               | -2.062078 | 1.121946  |
| 2                | 6                | 0              | -0.612952               | -2.839201 | 0.032458  |
| 3                | 6                | 0              | 0.370581                | -3.782648 | -0.624635 |
| 4                | 6                | 0              | 1.175323                | -3.117174 | -1.761585 |
| 5                | 6                | 0              | 1.636883                | -1.707890 | -1.475861 |
| 6                | 6                | 0              | 2.036437                | -1.186706 | -0.282602 |
| 7                | 6                | 0              | 2.192187                | -1.942044 | 1.016717  |
| 8                | 6                | 0              | 0.919694                | -1.898186 | 1.882510  |
| 9                | 1                | 0              | -1.229086               | -1.578354 | 1.580329  |
| 10               | 1                | 0              | -1.639026               | -2.880055 | -0.327997 |
| 11               | 1                | 0              | -0.181520               | -4.629153 | -1.045572 |

|    |    |   |           |           |           |
|----|----|---|-----------|-----------|-----------|
| 12 | 1  | 0 | 1.042811  | -4.204710 | 0.126417  |
| 13 | 1  | 0 | 2.036907  | -3.748183 | -2.022046 |
| 14 | 1  | 0 | 0.545887  | -3.074878 | -2.657510 |
| 15 | 1  | 0 | 1.765474  | -1.088311 | -2.360050 |
| 16 | 1  | 0 | 2.407270  | -0.164047 | -0.279911 |
| 17 | 1  | 0 | 3.005967  | -1.481779 | 1.585500  |
| 18 | 1  | 0 | 2.493305  | -2.974445 | 0.821529  |
| 19 | 1  | 0 | 0.983108  | -2.649881 | 2.682017  |
| 20 | 1  | 0 | 0.881356  | -0.923799 | 2.382476  |
| 21 | 6  | 0 | -0.067318 | 0.821579  | -1.700054 |
| 22 | 6  | 0 | -1.359988 | 1.122859  | -1.692918 |
| 23 | 1  | 0 | -1.880719 | 1.980047  | -2.136186 |
| 24 | 6  | 0 | 1.083551  | 1.569133  | -2.311619 |
| 25 | 1  | 0 | 2.044774  | 1.184060  | -1.935957 |
| 26 | 1  | 0 | 1.087778  | 1.431640  | -3.399268 |
| 27 | 8  | 0 | 1.039790  | 2.977137  | -2.128145 |
| 28 | 6  | 0 | 1.011488  | 3.376570  | -0.773536 |
| 29 | 1  | 0 | 0.072878  | 3.064221  | -0.295252 |
| 30 | 1  | 0 | 1.033329  | 4.471800  | -0.803027 |
| 31 | 6  | 0 | 2.177327  | 2.858108  | 0.021472  |
| 32 | 6  | 0 | 2.049819  | 2.164313  | 1.158443  |
| 33 | 1  | 0 | 3.169310  | 3.071022  | -0.379842 |
| 34 | 1  | 0 | 1.051385  | 1.942862  | 1.536565  |
| 35 | 6  | 0 | 3.173181  | 1.666401  | 1.947288  |
| 36 | 6  | 0 | 3.041792  | 1.027537  | 3.114662  |
| 37 | 1  | 0 | 4.169143  | 1.840686  | 1.540018  |
| 38 | 1  | 0 | 3.902987  | 0.674613  | 3.673320  |
| 39 | 1  | 0 | 2.063213  | 0.855992  | 3.558214  |
| 40 | 28 | 0 | -0.145009 | -0.749054 | -0.651063 |
| 41 | 6  | 0 | -1.960705 | 0.019216  | -0.857058 |
| 42 | 1  | 0 | -2.541141 | -0.701831 | -1.454122 |
| 43 | 14 | 0 | -2.901849 | 0.576371  | 0.653890  |
| 44 | 6  | 0 | -3.924777 | -0.845552 | 1.380690  |
| 45 | 1  | 0 | -3.329484 | -1.720412 | 1.666501  |
| 46 | 1  | 0 | -4.475852 | -0.517025 | 2.269971  |
| 47 | 1  | 0 | -4.662859 | -1.182754 | 0.642706  |
| 48 | 6  | 0 | -1.750373 | 1.301416  | 1.971290  |
| 49 | 1  | 0 | -0.966200 | 0.599118  | 2.276708  |
| 50 | 1  | 0 | -1.254891 | 2.193295  | 1.569420  |
| 51 | 1  | 0 | -2.303008 | 1.605485  | 2.868099  |
| 52 | 6  | 0 | -4.120445 | 1.950221  | 0.190143  |
| 53 | 1  | 0 | -3.595495 | 2.810406  | -0.242051 |
| 54 | 1  | 0 | -4.847598 | 1.600092  | -0.551828 |
| 55 | 1  | 0 | -4.678140 | 2.306277  | 1.064772  |

-----  
Zero-point correction= 0.478064 (Hartree/Particle)

Thermal correction to Energy= 0.505947

Thermal correction to Enthalpy= 0.506891

Thermal correction to Gibbs Free Energy= 0.421160

Sum of electronic and zero-point Energies= -1314.545534

Sum of electronic and thermal Energies= -1314.517651

Sum of electronic and thermal Enthalpies= -1314.516707

Sum of electronic and thermal Free Energies= -1314.602438

ωB97XD /6-311++G(d,p)-SDD/SMD//ωB97XD /6-31G(d)-LANL2DZ energy in tetrahydrofuran solvent = -1004.9030773

### INT15a

-----

| Center<br>Number | Atomic<br>Number | Atomic<br>Type | Coordinates (Angstroms) |           |           |
|------------------|------------------|----------------|-------------------------|-----------|-----------|
|                  |                  |                | X                       | Y         | Z         |
| 1                | 6                | 0              | -0.683882               | -1.308325 | -0.688535 |
| 2                | 6                | 0              | 0.426273                | -1.412686 | -1.418193 |
| 3                | 1                | 0              | 0.755058                | -2.217637 | -2.085531 |
| 4                | 6                | 0              | -1.868170               | -2.174885 | -0.435678 |
| 5                | 1                | 0              | -2.625587               | -2.048631 | -1.229892 |
| 6                | 1                | 0              | -1.572927               | -3.229124 | -0.415076 |
| 7                | 8                | 0              | -2.483479               | -1.938069 | 0.823064  |

-----

|    |    |   |           |           |           |
|----|----|---|-----------|-----------|-----------|
| 8  | 6  | 0 | -3.135189 | -0.694491 | 0.893488  |
| 9  | 1  | 0 | -3.675929 | -0.702092 | 1.845271  |
| 10 | 1  | 0 | -3.874866 | -0.601445 | 0.079434  |
| 11 | 6  | 0 | -2.194047 | 0.484895  | 0.854834  |
| 12 | 6  | 0 | -2.353929 | 1.513781  | -0.060891 |
| 13 | 1  | 0 | -1.535194 | 0.584242  | 1.715996  |
| 14 | 1  | 0 | -3.178382 | 1.449180  | -0.768717 |
| 15 | 6  | 0 | -1.336165 | 2.496821  | -0.354171 |
| 16 | 6  | 0 | -0.095811 | 2.529718  | 0.242623  |
| 17 | 1  | 0 | -1.492836 | 3.089347  | -1.252325 |
| 18 | 1  | 0 | 0.677184  | 3.163755  | -0.176585 |
| 19 | 1  | 0 | 0.093397  | 2.147709  | 1.241961  |
| 20 | 28 | 0 | -0.592830 | 0.552037  | -0.505264 |
| 21 | 6  | 0 | 1.144827  | -0.126483 | -1.146609 |
| 22 | 1  | 0 | 1.501883  | 0.420137  | -2.031700 |
| 23 | 14 | 0 | 2.405324  | -0.209282 | 0.235344  |
| 24 | 6  | 0 | 1.592156  | -0.613388 | 1.892456  |
| 25 | 1  | 0 | 1.063508  | 0.254555  | 2.305541  |
| 26 | 1  | 0 | 0.857117  | -1.416192 | 1.767568  |
| 27 | 1  | 0 | 2.333123  | -0.933741 | 2.634290  |
| 28 | 6  | 0 | 3.345636  | 1.426816  | 0.375817  |
| 29 | 1  | 0 | 4.182417  | 1.332036  | 1.078047  |
| 30 | 1  | 0 | 3.759378  | 1.729145  | -0.593501 |
| 31 | 1  | 0 | 2.706577  | 2.240451  | 0.735429  |
| 32 | 6  | 0 | 3.665299  | -1.572447 | -0.141179 |
| 33 | 1  | 0 | 4.173100  | -1.391191 | -1.095959 |
| 34 | 1  | 0 | 4.432441  | -1.640103 | 0.639460  |
| 35 | 1  | 0 | 3.171079  | -2.548888 | -0.209414 |

-----  
Zero-point correction= 0.293424 (Hartree/Particle)  
Thermal correction to Energy= 0.311843  
Thermal correction to Enthalpy= 0.312787  
Thermal correction to Gibbs Free Energy= 0.248283  
Sum of electronic and zero-point Energies= -1002.774719  
Sum of electronic and thermal Energies= -1002.756300  
Sum of electronic and thermal Enthalpies= -1002.755356  
Sum of electronic and thermal Free Energies= -1002.819860  
ωB97XD /6-311++G(d,p)-SDD/SMD//ωB97XD /6-31G(d)-LANL2DZ energy in tetrahydrofuran solvent = -1316.9431518

### TS5a

-----

| Center<br>Number | Atomic<br>Number | Atomic<br>Type | Coordinates (Angstroms) |           |           |
|------------------|------------------|----------------|-------------------------|-----------|-----------|
|                  |                  |                | X                       | Y         | Z         |
| 1                | 6                | 0              | 1.042025                | -1.146577 | -0.462714 |
| 2                | 6                | 0              | 0.015161                | -1.240365 | -1.369577 |
| 3                | 1                | 0              | 0.147812                | -1.808598 | -2.302950 |
| 4                | 6                | 0              | 2.368451                | -1.790409 | -0.700184 |
| 5                | 1                | 0              | 2.223030                | -2.840008 | -0.971804 |
| 6                | 1                | 0              | 2.951005                | -1.303631 | -1.505218 |
| 7                | 8                | 0              | 3.135139                | -1.782821 | 0.489281  |
| 8                | 6                | 0              | 3.237434                | -0.453046 | 0.900354  |
| 9                | 1                | 0              | 3.905266                | 0.109561  | 0.224447  |
| 10               | 1                | 0              | 3.680391                | -0.451314 | 1.900646  |
| 11               | 6                | 0              | 1.894347                | 0.259173  | 0.954062  |
| 12               | 6                | 0              | 1.822434                | 1.579545  | 0.421436  |
| 13               | 1                | 0              | 1.268562                | 0.013670  | 1.807893  |
| 14               | 1                | 0              | 2.594066                | 1.924795  | -0.264750 |
| 15               | 6                | 0              | 0.584072                | 2.322566  | 0.565645  |
| 16               | 6                | 0              | -0.035928               | 2.840468  | -0.558534 |
| 17               | 1                | 0              | 0.019010                | 2.241524  | 1.494871  |
| 18               | 1                | 0              | -1.033428               | 3.261352  | -0.490516 |
| 19               | 1                | 0              | 0.531744                | 3.078685  | -1.456437 |
| 20               | 28               | 0              | 0.347119                | 0.733245  | -0.566014 |
| 21               | 6                | 0              | -1.140379               | -0.384841 | -1.191159 |
| 22               | 1                | 0              | -1.669920               | -0.155831 | -2.122612 |
| 23               | 14               | 0              | -2.323127               | -0.511556 | 0.252315  |

|    |   |   |           |           |           |
|----|---|---|-----------|-----------|-----------|
| 24 | 6 | 0 | -3.561341 | -1.902733 | -0.084816 |
| 25 | 1 | 0 | -3.051296 | -2.871216 | -0.144149 |
| 26 | 1 | 0 | -4.318563 | -1.968244 | 0.705853  |
| 27 | 1 | 0 | -4.082872 | -1.744379 | -1.036092 |
| 28 | 6 | 0 | -1.461769 | -0.874028 | 1.891710  |
| 29 | 1 | 0 | -0.973262 | 0.020061  | 2.297447  |
| 30 | 1 | 0 | -2.184918 | -1.221732 | 2.638818  |
| 31 | 1 | 0 | -0.696218 | -1.646853 | 1.762401  |
| 32 | 6 | 0 | -3.285861 | 1.108510  | 0.397471  |
| 33 | 1 | 0 | -2.637196 | 1.922589  | 0.740684  |
| 34 | 1 | 0 | -3.708334 | 1.405381  | -0.569767 |
| 35 | 1 | 0 | -4.113418 | 1.018081  | 1.110793  |

-----  
Zero-point correction= 0.293008 (Hartree/Particle)  
Thermal correction to Energy= 0.310604  
Thermal correction to Enthalpy= 0.311548  
Thermal correction to Gibbs Free Energy= 0.248873  
Sum of electronic and zero-point Energies= -1002.752854  
Sum of electronic and thermal Energies= -1002.735258  
Sum of electronic and thermal Enthalpies= -1002.734314  
Sum of electronic and thermal Free Energies= -1002.796989  
ωB97XD /6-311++G(d,p)-SDD/SMD//ωB97XD /6-31G(d)-LANL2DZ energy in tetrahydrofuran solvent = -1004.879763

### INT20a

| Center<br>Number | Atomic<br>Number | Atomic<br>Type | Coordinates (Angstroms) |           |           |
|------------------|------------------|----------------|-------------------------|-----------|-----------|
|                  |                  |                | X                       | Y         | Z         |
| 1                | 6                | 0              | -1.393791               | -0.894735 | 0.032159  |
| 2                | 6                | 0              | 0.012135                | -1.078692 | 0.093806  |
| 3                | 1                | 0              | 0.329474                | -1.723151 | 0.916398  |
| 4                | 6                | 0              | -2.347175               | -1.684767 | 0.906963  |
| 5                | 1                | 0              | -1.909384               | -2.616807 | 1.273830  |
| 6                | 1                | 0              | -2.707166               | -1.104883 | 1.772900  |
| 7                | 8                | 0              | -3.424306               | -2.010722 | 0.049419  |
| 8                | 6                | 0              | -3.656359               | -0.902290 | -0.800826 |
| 9                | 1                | 0              | -4.448173               | -0.257304 | -0.391042 |
| 10               | 1                | 0              | -3.991249               | -1.291083 | -1.766053 |
| 11               | 6                | 0              | -2.328725               | -0.120257 | -0.901996 |
| 12               | 6                | 0              | -2.256147               | 1.197623  | -0.141867 |
| 13               | 1                | 0              | -1.964193               | -0.019820 | -1.929475 |
| 14               | 1                | 0              | -2.906673               | 1.338989  | 0.719106  |
| 15               | 6                | 0              | -1.346949               | 2.206301  | -0.587641 |
| 16               | 6                | 0              | -0.513645               | 2.895259  | 0.303907  |
| 17               | 1                | 0              | -1.065232               | 2.207442  | -1.642975 |
| 18               | 1                | 0              | 0.241895                | 3.574168  | -0.079398 |
| 19               | 1                | 0              | -0.831298               | 3.068727  | 1.333881  |
| 20               | 28               | 0              | -0.390904               | 0.844885  | 0.454520  |
| 21               | 6                | 0              | 1.012671                | -0.312542 | -0.554226 |
| 22               | 1                | 0              | 0.756479                | 0.134207  | -1.520349 |
| 23               | 14               | 0              | 2.826943                | -0.436937 | -0.148475 |
| 24               | 6                | 0              | 3.027323                | -1.068862 | 1.619700  |
| 25               | 1                | 0              | 4.085576                | -1.101013 | 1.903466  |
| 26               | 1                | 0              | 2.507960                | -0.414917 | 2.329898  |
| 27               | 1                | 0              | 2.626154                | -2.082275 | 1.739948  |
| 28               | 6                | 0              | 3.584137                | 1.283456  | -0.301141 |
| 29               | 1                | 0              | 4.665441                | 1.267857  | -0.121329 |
| 30               | 1                | 0              | 3.418382                | 1.697893  | -1.302785 |
| 31               | 1                | 0              | 3.124473                | 1.967896  | 0.420723  |
| 32               | 6                | 0              | 3.723849                | -1.609338 | -1.329567 |
| 33               | 1                | 0              | 3.618130                | -1.278541 | -2.369417 |
| 34               | 1                | 0              | 4.795697                | -1.665185 | -1.104737 |
| 35               | 1                | 0              | 3.312320                | -2.622997 | -1.261486 |

-----  
Zero-point correction= 0.294103 (Hartree/Particle)  
Thermal correction to Energy= 0.312376  
Thermal correction to Enthalpy= 0.313320



Thermal correction to Gibbs Free Energy= 0.247727  
 Sum of electronic and zero-point Energies= -1002.800276  
 Sum of electronic and thermal Energies= -1002.782002  
 Sum of electronic and thermal Enthalpies= -1002.781058  
 Sum of electronic and thermal Free Energies= -1002.846652  
 ωB97XD /6-311++G(d,p)-SDD/SMD//ωB97XD /6-31G(d)-LANL2DZ energy in tetrahydrofuran solvent = -1004.9259262

### INT21a

| Center Number | Atomic Number | Atomic Type | Coordinates (Angstroms) |           |           |
|---------------|---------------|-------------|-------------------------|-----------|-----------|
|               |               |             | X                       | Y         | Z         |
| 1             | 6             | 0           | 0.001745                | -1.592238 | -0.947103 |
| 2             | 6             | 0           | -0.933611               | -0.535331 | -1.123372 |
| 3             | 1             | 0           | -0.603671               | 0.269665  | -1.777294 |
| 4             | 6             | 0           | 1.217340                | -1.816345 | -1.817402 |
| 5             | 1             | 0           | 1.176278                | -1.258716 | -2.757699 |
| 6             | 1             | 0           | 2.161165                | -1.567302 | -1.307225 |
| 7             | 8             | 0           | 1.185135                | -3.200516 | -2.119358 |
| 8             | 6             | 0           | 0.761857                | -3.860292 | -0.941521 |
| 9             | 1             | 0           | 1.621115                | -4.054018 | -0.278522 |
| 10            | 1             | 0           | 0.327285                | -4.818423 | -1.233746 |
| 11            | 6             | 0           | -0.245066               | -2.919149 | -0.250685 |
| 12            | 6             | 0           | 0.123902                | -2.426143 | 1.123459  |
| 13            | 1             | 0           | -1.280504               | -3.271320 | -0.318118 |
| 14            | 1             | 0           | 1.166201                | -2.489374 | 1.428932  |
| 15            | 6             | 0           | -0.858147               | -1.859782 | 1.969569  |
| 16            | 6             | 0           | -0.585058               | -0.781392 | 2.829076  |
| 17            | 1             | 0           | -1.899246               | -2.098619 | 1.768660  |
| 18            | 1             | 0           | -1.412791               | -0.319739 | 3.360535  |
| 19            | 1             | 0           | 0.381874                | -0.703061 | 3.317590  |
| 20            | 28            | 0           | -0.122458               | -0.381125 | 0.816598  |
| 21            | 6             | 0           | -2.103668               | -0.358929 | -0.394125 |
| 22            | 1             | 0           | -2.521791               | -1.246024 | 0.079355  |
| 23            | 14            | 0           | -3.225325               | 1.123991  | -0.368611 |
| 24            | 6             | 0           | -2.408027               | 2.649466  | -1.121633 |
| 25            | 1             | 0           | -3.147219               | 3.450538  | -1.239590 |
| 26            | 1             | 0           | -1.608697               | 3.029915  | -0.476082 |
| 27            | 1             | 0           | -1.983033               | 2.447826  | -2.111937 |
| 28            | 6             | 0           | -3.658085               | 1.478815  | 1.434199  |
| 29            | 1             | 0           | -4.380647               | 2.297492  | 1.532173  |
| 30            | 1             | 0           | -4.093289               | 0.591709  | 1.910545  |
| 31            | 1             | 0           | -2.753905               | 1.743961  | 1.994358  |
| 32            | 6             | 0           | -4.821725               | 0.755720  | -1.312057 |
| 33            | 1             | 0           | -5.314972               | -0.139409 | -0.915132 |
| 34            | 1             | 0           | -5.532338               | 1.587597  | -1.236332 |
| 35            | 1             | 0           | -4.621568               | 0.578739  | -2.375000 |
| 36            | 6             | 0           | 3.484115                | 3.041079  | -0.273577 |
| 37            | 6             | 0           | 4.212474                | 1.965060  | 0.031255  |
| 38            | 6             | 0           | 3.862660                | 0.515690  | -0.193521 |
| 39            | 6             | 0           | 3.007150                | -0.088280 | 0.937468  |
| 40            | 6             | 0           | 1.715303                | 0.623211  | 1.302618  |
| 41            | 6             | 0           | 0.927799                | 1.465391  | 0.548549  |
| 42            | 6             | 0           | 1.202693                | 1.906887  | -0.868451 |
| 43            | 6             | 0           | 2.128714                | 3.135836  | -0.927884 |
| 44            | 1             | 0           | 3.920057                | 4.009810  | -0.029655 |
| 45            | 1             | 0           | 5.168795                | 2.140589  | 0.522883  |
| 46            | 1             | 0           | 4.789907                | -0.067155 | -0.244847 |
| 47            | 1             | 0           | 3.375569                | 0.376225  | -1.160880 |
| 48            | 1             | 0           | 2.815959                | -1.142825 | 0.703174  |
| 49            | 1             | 0           | 3.622744                | -0.101153 | 1.845971  |
| 50            | 1             | 0           | 1.560506                | 0.696796  | 2.374553  |
| 51            | 1             | 0           | 0.251028                | 2.116008  | 1.103722  |
| 52            | 1             | 0           | 0.262159                | 2.196230  | -1.344661 |
| 53            | 1             | 0           | 1.601942                | 1.086307  | -1.467716 |
| 54            | 1             | 0           | 2.261119                | 3.422706  | -1.981691 |
| 55            | 1             | 0           | 1.598064                | 3.979138  | -0.464813 |

```

-----
Zero-point correction=          0.480996 (Hartree/Particle)
Thermal correction to Energy=    0.507497
Thermal correction to Enthalpy=  0.508441
Thermal correction to Gibbs Free Energy= 0.425481
Sum of electronic and zero-point Energies= -1314.580000
Sum of electronic and thermal Energies= -1314.553499
Sum of electronic and thermal Enthalpies= -1314.552555
Sum of electronic and thermal Free Energies= -1314.635515
ωB97XD /6-311++G(d,p)-SDD/SMD//ωB97XD /6-31G(d)-LANL2DZ energy in tetrahydrofuran solvent = -1316.978113

```

### TS10a

```

-----
Center   Atomic   Atomic   Coordinates (Angstroms)
Number   Number   Type     X         Y         Z
-----
  1      6      0    -0.778617  1.621289 -0.401017
  2      6      0    -0.932793  0.472775 -1.252771
  3      1      0    -0.371242  0.572137 -2.183715
  4      6      0    -0.198437  2.904305 -0.989295
  5      1      0     0.866777  2.846037 -1.232341
  6      1      0    -0.754794  3.151298 -1.907687
  7      8      0    -0.367258  3.912645 -0.013146
  8      6      0    -1.470823  3.549283  0.798743
  9      1      0    -2.422637  3.856158  0.338052
 10     1      0    -1.355666  4.055373  1.760811
 11     6      0    -1.402067  2.033598  0.889377
 12     6      0    -0.081484  1.517248  1.354661
 13     1      0    -2.287788  1.521235  1.248820
 14     1      0     0.718011  2.249938  1.404826
 15     6      0     0.130116  0.259561  2.023292
 16     6      0    -0.802788 -0.769688  2.060145
 17     1      0     1.095947  0.132886  2.502561
 18     1      0    -0.556681 -1.688769  2.583558
 19     1      0    -1.858679 -0.581009  1.919120
 20    28      0     0.129388 -0.473535  0.164369
 21     6      0    -1.600660 -0.744067 -1.042606
 22     1      0    -1.377989 -1.435979 -1.864386
 23    14      0    -3.271032 -1.264529 -0.376808
 24     6      0    -4.231606 -0.025042  0.682481
 25     1      0    -3.854319  0.097565  1.702991
 26     1      0    -4.272795  0.960958  0.205501
 27     1      0    -5.263872 -0.386913  0.766873
 28     6      0    -3.127165 -2.917142  0.518964
 29     1      0    -4.116017 -3.359889  0.687741
 30     1      0    -2.544435 -3.621121 -0.086646
 31     1      0    -2.623695 -2.821503  1.485458
 32     6      0    -4.335102 -1.543453 -1.917918
 33     1      0    -3.871175 -2.267085 -2.598464
 34     1      0    -5.327030 -1.927901 -1.651132
 35     1      0    -4.475161 -0.608655 -2.473237
 36     6      0     5.135737 -0.994450 -0.110656
 37     6      0     4.844485  0.073542 -0.858035
 38     6      0     3.574772  0.891141 -0.951871
 39     6      0     2.478911  0.182375 -1.761388
 40     6      0     1.746872 -0.965752 -1.100461
 41     6      0     1.924974 -1.542760  0.144289
 42     6      0     2.924527 -1.199676  1.229926
 43     6      0     4.344457 -1.705394  0.953021
 44     1      0     6.120642 -1.434956 -0.271289
 45     1      0     5.617116  0.380338 -1.562869
 46     1      0     3.817425  1.827526 -1.467417
 47     1      0     3.182360  1.186262  0.024970
 48     1      0     1.748669  0.930730 -2.096885
 49     1      0     2.937671 -0.203020 -2.682988
 50     1      0     1.204243 -1.581758 -1.818476
 51     1      0     1.509893 -2.545940  0.251904

```

|    |   |   |          |           |          |
|----|---|---|----------|-----------|----------|
| 52 | 1 | 0 | 2.574688 | -1.670988 | 2.156694 |
| 53 | 1 | 0 | 2.964510 | -0.128650 | 1.438544 |
| 54 | 1 | 0 | 4.923164 | -1.655273 | 1.887639 |
| 55 | 1 | 0 | 4.302647 | -2.773962 | 0.696339 |

-----  
Zero-point correction= 0.481430 (Hartree/Particle)  
Thermal correction to Energy= 0.506911  
Thermal correction to Enthalpy= 0.507855  
Thermal correction to Gibbs Free Energy= 0.427432  
Sum of electronic and zero-point Energies= -1314.566474  
Sum of electronic and thermal Energies= -1314.540993  
Sum of electronic and thermal Enthalpies= -1314.540049  
Sum of electronic and thermal Free Energies= -1314.620472  
ωB97XD /6-311++G(d,p)-SDD/SMD//ωB97XD /6-31G(d)-LANL2DZ energy in tetrahydrofuran solvent = -1316.9617545

### TS11a

-----

| Center<br>Number | Atomic<br>Number | Atomic<br>Type | Coordinates (Angstroms) |           |           |
|------------------|------------------|----------------|-------------------------|-----------|-----------|
|                  |                  |                | X                       | Y         | Z         |
| 1                | 6                | 0              | -1.405213               | -0.327794 | -0.604508 |
| 2                | 6                | 0              | -0.307339               | -0.183474 | -1.461224 |
| 3                | 1                | 0              | -0.569126               | -0.238221 | -2.520737 |
| 4                | 6                | 0              | -2.675324               | -1.071306 | -0.981117 |
| 5                | 1                | 0              | -3.164532               | -0.695730 | -1.885275 |
| 6                | 1                | 0              | -2.439905               | -2.137105 | -1.131141 |
| 7                | 8                | 0              | -3.572215               | -0.908319 | 0.102723  |
| 8                | 6                | 0              | -2.799174               | -0.714886 | 1.275598  |
| 9                | 1                | 0              | -2.482907               | -1.677984 | 1.706676  |
| 10               | 1                | 0              | -3.425250               | -0.187224 | 2.000009  |
| 11               | 6                | 0              | -1.581172               | 0.075781  | 0.824645  |
| 12               | 6                | 0              | -1.911199               | 1.344174  | 0.113219  |
| 13               | 1                | 0              | -0.737997               | 0.079727  | 1.506510  |
| 14               | 1                | 0              | -2.957092               | 1.493270  | -0.138579 |
| 15               | 6                | 0              | -0.981751               | 2.354203  | -0.169944 |
| 16               | 6                | 0              | 0.358859                | 2.228756  | 0.113854  |
| 17               | 1                | 0              | -1.303753               | 3.137006  | -0.853654 |
| 18               | 1                | 0              | 1.066132                | 2.981843  | -0.220178 |
| 19               | 1                | 0              | 0.668564                | 1.671202  | 0.990196  |
| 20               | 6                | 0              | 0.939905                | 0.334719  | -1.130665 |
| 21               | 1                | 0              | 1.488896                | 0.678440  | -2.016596 |
| 22               | 14               | 0              | 2.199954                | -0.349542 | 0.080341  |
| 23               | 6                | 0              | 3.057607                | -1.767272 | -0.826630 |
| 24               | 1                | 0              | 3.860783                | -2.199396 | -0.217825 |
| 25               | 1                | 0              | 2.344755                | -2.564625 | -1.064286 |
| 26               | 1                | 0              | 3.500454                | -1.426914 | -1.769594 |
| 27               | 6                | 0              | 1.532826                | -1.048071 | 1.702263  |
| 28               | 1                | 0              | 2.344348                | -1.594139 | 2.198477  |
| 29               | 1                | 0              | 1.191614                | -0.278245 | 2.402847  |
| 30               | 1                | 0              | 0.713982                | -1.756407 | 1.536387  |
| 31               | 6                | 0              | 3.496570                | 0.967941  | 0.462942  |
| 32               | 1                | 0              | 4.355025                | 0.520582  | 0.977331  |
| 33               | 1                | 0              | 3.869620                | 1.429324  | -0.458787 |
| 34               | 1                | 0              | 3.107182                | 1.768116  | 1.101069  |

-----  
Zero-point correction= 0.294876 (Hartree/Particle)  
Thermal correction to Energy= 0.310483  
Thermal correction to Enthalpy= 0.311427  
Thermal correction to Gibbs Free Energy= 0.253242  
Sum of electronic and zero-point Energies= -833.473033  
Sum of electronic and thermal Energies= -833.457426  
Sum of electronic and thermal Enthalpies= -833.456482  
Sum of electronic and thermal Free Energies= -833.514667  
ωB97XD /6-311++G(d,p)-SDD/SMD//ωB97XD /6-31G(d)-LANL2DZ energy in tetrahydrofuran solvent = -833.9469545

### TS11a'

| Center<br>Number | Atomic<br>Number | Atomic<br>Type | Coordinates (Angstroms) |           |           |
|------------------|------------------|----------------|-------------------------|-----------|-----------|
|                  |                  |                | X                       | Y         | Z         |
| 1                | 6                | 0              | 1.309858                | -0.171663 | -0.670040 |
| 2                | 6                | 0              | 0.319074                | 0.316161  | -1.532475 |
| 3                | 1                | 0              | 0.713103                | 0.973120  | -2.315256 |
| 4                | 6                | 0              | 1.567652                | -1.516140 | -0.020775 |
| 5                | 1                | 0              | 0.849331                | -1.829177 | 0.742930  |
| 6                | 1                | 0              | 1.588762                | -2.285477 | -0.807548 |
| 7                | 8                | 0              | 2.838579                | -1.407730 | 0.606139  |
| 8                | 6                | 0              | 3.577561                | -0.361108 | -0.013438 |
| 9                | 1                | 0              | 4.127374                | -0.729661 | -0.892570 |
| 10               | 1                | 0              | 4.292193                | 0.011524  | 0.726201  |
| 11               | 6                | 0              | 2.527844                | 0.649368  | -0.444606 |
| 12               | 6                | 0              | 1.657907                | 1.079250  | 0.714791  |
| 13               | 1                | 0              | 2.802107                | 1.393648  | -1.192489 |
| 14               | 1                | 0              | 1.962087                | 0.598009  | 1.643687  |
| 15               | 6                | 0              | 0.530525                | 1.895914  | 0.843446  |
| 16               | 6                | 0              | -0.354659               | 2.363754  | -0.143038 |
| 17               | 1                | 0              | 0.154276                | 1.934020  | 1.863458  |
| 18               | 1                | 0              | -1.233975               | 2.895616  | 0.221927  |
| 19               | 1                | 0              | 0.017891                | 2.772162  | -1.075911 |
| 20               | 6                | 0              | -0.978574               | 0.643334  | -1.112708 |
| 21               | 1                | 0              | -1.581383               | 1.143750  | -1.877511 |
| 22               | 14               | 0              | -2.077509               | -0.367964 | 0.052041  |
| 23               | 6                | 0              | -3.804631               | 0.383000  | -0.056833 |
| 24               | 1                | 0              | -4.506157               | -0.145751 | 0.598300  |
| 25               | 1                | 0              | -3.797183               | 1.436539  | 0.246483  |
| 26               | 1                | 0              | -4.199793               | 0.331822  | -1.077754 |
| 27               | 6                | 0              | -1.561443               | -0.374852 | 1.865854  |
| 28               | 1                | 0              | -2.140421               | -1.134618 | 2.404410  |
| 29               | 1                | 0              | -0.499271               | -0.590355 | 2.011848  |
| 30               | 1                | 0              | -1.769359               | 0.593300  | 2.333540  |
| 31               | 6                | 0              | -2.124320               | -2.142403 | -0.589156 |
| 32               | 1                | 0              | -2.798570               | -2.762380 | 0.013256  |
| 33               | 1                | 0              | -2.473448               | -2.174855 | -1.627133 |
| 34               | 1                | 0              | -1.131840               | -2.605610 | -0.563679 |

Zero-point correction= 0.295118 (Hartree/Particle)

Thermal correction to Energy= 0.310642

Thermal correction to Enthalpy= 0.311586

Thermal correction to Gibbs Free Energy= 0.253921

Sum of electronic and zero-point Energies= -833.448683

Sum of electronic and thermal Energies= -833.433158

Sum of electronic and thermal Enthalpies= -833.432214

Sum of electronic and thermal Free Energies= -833.489879

ωB97XD /6-311++G(d,p)-SDD/SMD//ωB97XD /6-31G(d)-LANL2DZ energy in tetrahydrofuran solvent = -833.9216384

### TS13a

| Center<br>Number | Atomic<br>Number | Atomic<br>Type | Coordinates (Angstroms) |           |           |
|------------------|------------------|----------------|-------------------------|-----------|-----------|
|                  |                  |                | X                       | Y         | Z         |
| 1                | 6                | 0              | 0.093323                | 1.711699  | -0.870953 |
| 2                | 6                | 0              | 0.940537                | 0.564053  | -1.023255 |
| 3                | 1                | 0              | 0.569374                | -0.193216 | -1.707992 |
| 4                | 6                | 0              | -1.143370               | 1.989949  | -1.696913 |
| 5                | 1                | 0              | -1.184599               | 1.380620  | -2.604612 |
| 6                | 1                | 0              | -2.074466               | 1.829472  | -1.129811 |
| 7                | 8                | 0              | -1.030358               | 3.349222  | -2.076171 |
| 8                | 6                | 0              | -0.426229               | 4.045024  | -0.999558 |
| 9                | 1                | 0              | -1.192894               | 4.452976  | -0.322523 |
| 10               | 1                | 0              | 0.142733                | 4.877735  | -1.419249 |
| 11               | 6                | 0              | 0.466093                | 3.031914  | -0.263835 |
| 12               | 6                | 0              | -0.066963               | 2.432171  | 0.989555  |
| 13               | 1                | 0              | 1.531437                | 3.272541  | -0.245286 |
| 14               | 1                | 0              | -1.124877               | 2.572475  | 1.200844  |

|    |    |   |           |           |           |
|----|----|---|-----------|-----------|-----------|
| 15 | 6  | 0 | 0.788489  | 1.804122  | 1.950496  |
| 16 | 6  | 0 | 0.328704  | 0.845979  | 2.859668  |
| 17 | 1  | 0 | 1.855830  | 1.993406  | 1.883879  |
| 18 | 1  | 0 | 1.042231  | 0.381502  | 3.534858  |
| 19 | 1  | 0 | -0.698794 | 0.871404  | 3.211826  |
| 20 | 28 | 0 | 0.132689  | 0.243346  | 0.862710  |
| 21 | 6  | 0 | 2.110058  | 0.321908  | -0.312816 |
| 22 | 1  | 0 | 2.580207  | 1.175224  | 0.174230  |
| 23 | 14 | 0 | 3.144830  | -1.222610 | -0.337362 |
| 24 | 6  | 0 | 2.309515  | -2.626386 | -1.283875 |
| 25 | 1  | 0 | 3.024924  | -3.440922 | -1.447534 |
| 26 | 1  | 0 | 1.461017  | -3.039471 | -0.728074 |
| 27 | 1  | 0 | 1.950595  | -2.303598 | -2.268372 |
| 28 | 6  | 0 | 3.436049  | -1.763804 | 1.447401  |
| 29 | 1  | 0 | 4.065901  | -2.659021 | 1.511072  |
| 30 | 1  | 0 | 3.927457  | -0.966645 | 2.018550  |
| 31 | 1  | 0 | 2.477859  | -1.975201 | 1.936029  |
| 32 | 6  | 0 | 4.819299  | -0.866531 | -1.141081 |
| 33 | 1  | 0 | 5.325837  | -0.029472 | -0.646026 |
| 34 | 1  | 0 | 5.483084  | -1.737649 | -1.083425 |
| 35 | 1  | 0 | 4.700204  | -0.603143 | -2.198343 |
| 36 | 6  | 0 | -3.570061 | -2.909706 | -0.468978 |
| 37 | 6  | 0 | -4.244204 | -1.848679 | -0.020843 |
| 38 | 6  | 0 | -3.836937 | -0.398180 | -0.077567 |
| 39 | 6  | 0 | -2.929620 | 0.026111  | 1.093487  |
| 40 | 6  | 0 | -1.648696 | -0.764578 | 1.315132  |
| 41 | 6  | 0 | -0.910974 | -1.516023 | 0.417503  |
| 42 | 6  | 0 | -1.266366 | -1.798363 | -1.024196 |
| 43 | 6  | 0 | -2.235821 | -2.985238 | -1.166838 |
| 44 | 1  | 0 | -4.042298 | -3.881971 | -0.327351 |
| 45 | 1  | 0 | -5.196241 | -2.042931 | 0.472206  |
| 46 | 1  | 0 | -4.739132 | 0.223596  | -0.033043 |
| 47 | 1  | 0 | -3.363870 | -0.160365 | -1.032608 |
| 48 | 1  | 0 | -2.713132 | 1.096573  | 0.984654  |
| 49 | 1  | 0 | -3.517656 | -0.057867 | 2.016172  |
| 50 | 1  | 0 | -1.471898 | -1.006370 | 2.359036  |
| 51 | 1  | 0 | -0.245451 | -2.259626 | 0.859607  |
| 52 | 1  | 0 | -0.358407 | -2.067313 | -1.572003 |
| 53 | 1  | 0 | -1.663438 | -0.910772 | -1.520181 |
| 54 | 1  | 0 | -2.406160 | -3.171705 | -2.237782 |
| 55 | 1  | 0 | -1.722364 | -3.883861 | -0.797407 |

-----  
Zero-point correction= 0.481047 (Hartree/Particle)

Thermal correction to Energy= 0.506829

Thermal correction to Enthalpy= 0.507773

Thermal correction to Gibbs Free Energy= 0.426835

Sum of electronic and zero-point Energies= -1314.578567

Sum of electronic and thermal Energies= -1314.552786

Sum of electronic and thermal Enthalpies= -1314.551841

Sum of electronic and thermal Free Energies= -1314.632780

ωB97XD /6-311++G(d,p)-SDD/SMD//ωB97XD /6-31G(d)-LANL2DZ energy in tetrahydrofuran solvent = -1316.9750966

#### TS14a

| Center Number | Atomic Number | Atomic Type | Coordinates (Angstroms) |           |           |
|---------------|---------------|-------------|-------------------------|-----------|-----------|
|               |               |             | X                       | Y         | Z         |
| 1             | 6             | 0           | 1.405145                | -0.327825 | -0.604432 |
| 2             | 6             | 0           | 0.307260                | -0.183457 | -1.461138 |
| 3             | 1             | 0           | 0.569056                | -0.238239 | -2.520648 |
| 4             | 6             | 0           | 2.675168                | -1.071480 | -0.981062 |
| 5             | 1             | 0           | 2.439660                | -2.137289 | -1.130875 |
| 6             | 1             | 0           | 3.164293                | -0.696091 | -1.885343 |
| 7             | 8             | 0           | 3.572193                | -0.908376 | 0.102646  |
| 8             | 6             | 0           | 2.799283                | -0.714797 | 1.275580  |
| 9             | 1             | 0           | 3.425453                | -0.187085 | 1.999874  |
| 10            | 1             | 0           | 2.483020                | -1.677838 | 1.706788  |

|    |    |   |           |           |           |
|----|----|---|-----------|-----------|-----------|
| 11 | 6  | 0 | 1.581266  | 0.075878  | 0.824673  |
| 12 | 6  | 0 | 1.911276  | 1.344173  | 0.113070  |
| 13 | 1  | 0 | 0.738190  | 0.079944  | 1.506658  |
| 14 | 1  | 0 | 2.957145  | 1.493248  | -0.138839 |
| 15 | 6  | 0 | 0.981819  | 2.354215  | -0.170053 |
| 16 | 6  | 0 | -0.358778 | 2.228792  | 0.113840  |
| 17 | 1  | 0 | 1.303765  | 3.136970  | -0.853845 |
| 18 | 1  | 0 | -1.066074 | 2.981879  | -0.220144 |
| 19 | 1  | 0 | -0.668429 | 1.671239  | 0.990202  |
| 20 | 6  | 0 | -0.939954 | 0.334834  | -1.130603 |
| 21 | 1  | 0 | -1.488922 | 0.678549  | -2.016547 |
| 22 | 14 | 0 | -2.199976 | -0.349522 | 0.080379  |
| 23 | 6  | 0 | -1.532608 | -1.048824 | 1.701863  |
| 24 | 1  | 0 | -1.191560 | -0.279308 | 2.402864  |
| 25 | 1  | 0 | -2.343962 | -1.595376 | 2.197817  |
| 26 | 1  | 0 | -0.713588 | -1.756850 | 1.535539  |
| 27 | 6  | 0 | -3.496304 | 0.968031  | 0.463732  |
| 28 | 1  | 0 | -3.869512 | 1.429759  | -0.457762 |
| 29 | 1  | 0 | -4.354702 | 0.520604  | 0.978158  |
| 30 | 1  | 0 | -3.106689 | 1.767950  | 1.102042  |
| 31 | 6  | 0 | -3.058109 | -1.766694 | -0.827014 |
| 32 | 1  | 0 | -3.500834 | -1.425882 | -1.769873 |
| 33 | 1  | 0 | -2.345536 | -2.564221 | -1.064924 |
| 34 | 1  | 0 | -3.861442 | -2.198726 | -0.218350 |

-----  
Zero-point correction= 0.294890 (Hartree/Particle)  
Thermal correction to Energy= 0.310492  
Thermal correction to Enthalpy= 0.311436  
Thermal correction to Gibbs Free Energy= 0.253263  
Sum of electronic and zero-point Energies= -833.473020  
Sum of electronic and thermal Energies= -833.457417  
Sum of electronic and thermal Enthalpies= -833.456473  
Sum of electronic and thermal Free Energies= -833.514646  
ωB97XD /6-311++G(d,p)-SDD/SMD//ωB97XD /6-31G(d)-LANL2DZ energy in tetrahydrofuran solvent = -833.9469532

#### TS14a'

-----

| Center Number | Atomic Number | Atomic Type | Coordinates (Angstroms) |           |           |
|---------------|---------------|-------------|-------------------------|-----------|-----------|
|               |               |             | X                       | Y         | Z         |
| 1             | 6             | 0           | -1.309936               | -0.171689 | -0.670074 |
| 2             | 6             | 0           | -0.319138               | 0.316141  | -1.532465 |
| 3             | 1             | 0           | -0.713137               | 0.973138  | -2.315229 |
| 4             | 6             | 0           | -1.567666               | -1.516122 | -0.020708 |
| 5             | 1             | 0           | -1.588645               | -2.285554 | -0.807390 |
| 6             | 1             | 0           | -0.849358               | -1.828999 | 0.743079  |
| 7             | 8             | 0           | -2.838655               | -1.407763 | 0.606096  |
| 8             | 6             | 0           | -3.577619               | -0.361083 | -0.013409 |
| 9             | 1             | 0           | -4.292169               | 0.011572  | 0.726300  |
| 10            | 1             | 0           | -4.127531               | -0.729574 | -0.892503 |
| 11            | 6             | 0           | -2.527895               | 0.649372  | -0.444607 |
| 12            | 6             | 0           | -1.657973               | 1.079274  | 0.714796  |
| 13            | 1             | 0           | -2.802171               | 1.393630  | -1.192508 |
| 14            | 1             | 0           | -1.962169               | 0.598026  | 1.643684  |
| 15            | 6             | 0           | -0.530545               | 1.895870  | 0.843473  |
| 16            | 6             | 0           | 0.354640                | 2.363721  | -0.142998 |
| 17            | 1             | 0           | -0.154262               | 1.933872  | 1.863476  |
| 18            | 1             | 0           | 1.233984                | 2.895536  | 0.221962  |
| 19            | 1             | 0           | -0.017911               | 2.772169  | -1.075853 |
| 20            | 6             | 0           | 0.978525                | 0.643261  | -1.112722 |
| 21            | 1             | 0           | 1.581310                | 1.143656  | -1.877560 |
| 22            | 14            | 0           | 2.077546                | -0.367960 | 0.052002  |
| 23            | 6             | 0           | 1.561686                | -0.374861 | 1.865877  |
| 24            | 1             | 0           | 0.499609                | -0.590645 | 2.012103  |
| 25            | 1             | 0           | 2.140947                | -1.134449 | 2.404384  |
| 26            | 1             | 0           | 1.769439                | 0.593375  | 2.333458  |
| 27            | 6             | 0           | 2.124399                | -2.142412 | -0.589146 |

|    |   |   |          |           |           |
|----|---|---|----------|-----------|-----------|
| 28 | 1 | 0 | 2.473177 | -2.174878 | -1.627240 |
| 29 | 1 | 0 | 2.798930 | -2.762267 | 0.013077  |
| 30 | 1 | 0 | 1.131982 | -2.605740 | -0.563303 |
| 31 | 6 | 0 | 3.804611 | 0.383128  | -0.056933 |
| 32 | 1 | 0 | 4.199510 | 0.332594  | -1.077987 |
| 33 | 1 | 0 | 3.797207 | 1.436478  | 0.247038  |
| 34 | 1 | 0 | 4.506325 | -0.145991 | 0.597703  |

-----  
Zero-point correction= 0.295109 (Hartree/Particle)  
Thermal correction to Energy= 0.310638  
Thermal correction to Enthalpy= 0.311582  
Thermal correction to Gibbs Free Energy= 0.253903  
Sum of electronic and zero-point Energies= -833.448691  
Sum of electronic and thermal Energies= -833.433162  
Sum of electronic and thermal Enthalpies= -833.432218  
Sum of electronic and thermal Free Energies= -833.489898  
ωB97XD /6-311++G(d,p)-SDD/SMD//ωB97XD /6-31G(d)-LANL2DZ energy in tetrahydrofuran solvent = -833.9216392

### INT22a

-----

| Center<br>Number | Atomic<br>Number | Atomic<br>Type | Coordinates (Angstroms) |           |           |
|------------------|------------------|----------------|-------------------------|-----------|-----------|
|                  |                  |                | X                       | Y         | Z         |
| 1                | 6                | 0              | 1.854163                | 1.242835  | -0.657729 |
| 2                | 6                | 0              | 1.242667                | -0.108266 | -0.758374 |
| 3                | 1                | 0              | 0.591258                | -0.257221 | -1.617095 |
| 4                | 6                | 0              | 1.712775                | 2.238194  | -1.795364 |
| 5                | 1                | 0              | 1.923219                | 1.739572  | -2.756015 |
| 6                | 1                | 0              | 0.725326                | 2.708114  | -1.854305 |
| 7                | 8                | 0              | 2.654725                | 3.261331  | -1.530767 |
| 8                | 6                | 0              | 3.761360                | 2.680590  | -0.857732 |
| 9                | 1                | 0              | 4.238272                | 3.475515  | -0.276898 |
| 10               | 1                | 0              | 4.493187                | 2.274277  | -1.573535 |
| 11               | 6                | 0              | 3.183075                | 1.558446  | -0.018094 |
| 12               | 6                | 0              | 1.939581                | 1.889954  | 0.746592  |
| 13               | 1                | 0              | 3.836805                | 0.764539  | 0.333916  |
| 14               | 1                | 0              | 1.647870                | 2.939011  | 0.792979  |
| 15               | 6                | 0              | 1.505342                | 1.027447  | 1.887314  |
| 16               | 6                | 0              | 0.327785                | 1.249861  | 2.574292  |
| 17               | 1                | 0              | 2.230256                | 0.331415  | 2.303546  |
| 18               | 1                | 0              | 0.137078                | 0.723288  | 3.505949  |
| 19               | 1                | 0              | -0.254338               | 2.153429  | 2.415448  |
| 20               | 28               | 0              | -0.002413               | 0.036505  | 0.908258  |
| 21               | 6                | 0              | 1.576152                | -1.177124 | 0.047985  |
| 22               | 1                | 0              | 2.442019                | -1.051096 | 0.699504  |
| 23               | 14               | 0              | 1.038825                | -2.963198 | -0.125414 |
| 24               | 6                | 0              | -0.122603               | -3.240900 | -1.584771 |
| 25               | 1                | 0              | -0.187290               | -4.313568 | -1.802598 |
| 26               | 1                | 0              | -1.137487               | -2.884227 | -1.386504 |
| 27               | 1                | 0              | 0.242749                | -2.743188 | -2.490581 |
| 28               | 6                | 0              | 0.237109                | -3.538895 | 1.481930  |
| 29               | 1                | 0              | -0.037238               | -4.599393 | 1.435466  |
| 30               | 1                | 0              | 0.930623                | -3.409309 | 2.321375  |
| 31               | 1                | 0              | -0.664652               | -2.959882 | 1.708206  |
| 32               | 6                | 0              | 2.606261                | -3.980772 | -0.406404 |
| 33               | 1                | 0              | 3.325771                | -3.836854 | 0.408320  |
| 34               | 1                | 0              | 2.378875                | -5.051977 | -0.462381 |
| 35               | 1                | 0              | 3.100942                | -3.693738 | -1.341405 |
| 36               | 6                | 0              | -4.603319               | -0.054706 | -0.806538 |
| 37               | 6                | 0              | -4.649513               | 1.047675  | -0.055653 |
| 38               | 6                | 0              | -3.601072               | 2.126829  | -0.028391 |
| 39               | 6                | 0              | -2.401509               | 1.864573  | 0.928769  |
| 40               | 6                | 0              | -1.992301               | 0.408210  | 1.114826  |
| 41               | 6                | 0              | -1.774791               | -0.494319 | 0.074691  |
| 42               | 6                | 0              | -2.050835               | -0.159756 | -1.372187 |
| 43               | 6                | 0              | -3.513069               | -0.481165 | -1.765457 |
| 44               | 1                | 0              | -5.441389               | -0.746792 | -0.732623 |

|    |   |   |           |           |           |
|----|---|---|-----------|-----------|-----------|
| 45 | 1 | 0 | -5.506897 | 1.180560  | 0.602652  |
| 46 | 1 | 0 | -4.062941 | 3.077811  | 0.260883  |
| 47 | 1 | 0 | -3.222637 | 2.279984  | -1.043751 |
| 48 | 1 | 0 | -1.561163 | 2.466136  | 0.559358  |
| 49 | 1 | 0 | -2.643214 | 2.267727  | 1.918360  |
| 50 | 1 | 0 | -2.250630 | -0.015534 | 2.083995  |
| 51 | 1 | 0 | -1.889972 | -1.552562 | 0.318393  |
| 52 | 1 | 0 | -1.406791 | -0.745625 | -2.037702 |
| 53 | 1 | 0 | -1.812175 | 0.889450  | -1.570177 |
| 54 | 1 | 0 | -3.710833 | -0.060839 | -2.762832 |
| 55 | 1 | 0 | -3.591946 | -1.569297 | -1.887461 |

-----  
Zero-point correction= 0.481385 (Hartree/Particle)  
Thermal correction to Energy= 0.507458  
Thermal correction to Enthalpy= 0.508402  
Thermal correction to Gibbs Free Energy= 0.426828  
Sum of electronic and zero-point Energies= -1314.600226  
Sum of electronic and thermal Energies= -1314.574153  
Sum of electronic and thermal Enthalpies= -1314.573209  
Sum of electronic and thermal Free Energies= -1314.654783  
ωB97XD /6-311++G(d,p)-SDD/SMD//ωB97XD /6-31G(d)-LANL2DZ energy in tetrahydrofuran solvent = -1316.9918295

### INT23a

-----

| Center<br>Number | Atomic<br>Number | Atomic<br>Type | Coordinates (Angstroms) |           |           |
|------------------|------------------|----------------|-------------------------|-----------|-----------|
|                  |                  |                | X                       | Y         | Z         |
| 1                | 6                | 0              | -1.082660               | -0.150381 | 0.600913  |
| 2                | 6                | 0              | -0.261397               | 0.925552  | 1.222364  |
| 3                | 1                | 0              | -0.809519               | 1.548981  | 1.932128  |
| 4                | 6                | 0              | -1.059485               | -1.544274 | 1.224288  |
| 5                | 1                | 0              | -0.029286               | -1.799931 | 1.509304  |
| 6                | 1                | 0              | -1.702265               | -1.641077 | 2.105120  |
| 7                | 8                | 0              | -1.561999               | -2.427970 | 0.235943  |
| 8                | 6                | 0              | -1.262565               | -1.900418 | -1.047517 |
| 9                | 1                | 0              | -2.032609               | -2.264956 | -1.734409 |
| 10               | 1                | 0              | -0.281200               | -2.248807 | -1.407261 |
| 11               | 6                | 0              | -1.250443               | -0.398301 | -0.873300 |
| 12               | 6                | 0              | -2.403622               | 0.173831  | -0.076788 |
| 13               | 1                | 0              | -0.765330               | 0.228790  | -1.613257 |
| 14               | 1                | 0              | -3.228753               | -0.506099 | 0.132414  |
| 15               | 6                | 0              | -2.781194               | 1.587402  | -0.284597 |
| 16               | 6                | 0              | -4.020117               | 2.062745  | -0.174856 |
| 17               | 1                | 0              | -1.968988               | 2.268039  | -0.541841 |
| 18               | 1                | 0              | -4.241261               | 3.112298  | -0.341557 |
| 19               | 1                | 0              | -4.857005               | 1.417833  | 0.082990  |
| 20               | 6                | 0              | 1.040825                | 1.166475  | 1.022766  |
| 21               | 1                | 0              | 1.447048                | 1.993279  | 1.612046  |
| 22               | 14               | 0              | 2.322259                | 0.321118  | -0.075280 |
| 23               | 6                | 0              | 2.470155                | -1.528939 | 0.261101  |
| 24               | 1                | 0              | 1.587405                | -2.087079 | -0.066049 |
| 25               | 1                | 0              | 3.335705                | -1.936050 | -0.275166 |
| 26               | 1                | 0              | 2.616244                | -1.728939 | 1.328319  |
| 27               | 6                | 0              | 2.005854                | 0.585423  | -1.920216 |
| 28               | 1                | 0              | 1.608200                | 1.584835  | -2.126781 |
| 29               | 1                | 0              | 2.945665                | 0.478332  | -2.474488 |
| 30               | 1                | 0              | 1.303284                | -0.150442 | -2.324536 |
| 31               | 6                | 0              | 3.961195                | 1.141007  | 0.373268  |
| 32               | 1                | 0              | 3.938044                | 2.217546  | 0.167866  |
| 33               | 1                | 0              | 4.190088                | 1.010456  | 1.437246  |
| 34               | 1                | 0              | 4.789630                | 0.710368  | -0.200293 |

-----  
Zero-point correction= 0.295064 (Hartree/Particle)  
Thermal correction to Energy= 0.311980  
Thermal correction to Enthalpy= 0.312925  
Thermal correction to Gibbs Free Energy= 0.250562  
Sum of electronic and zero-point Energies= -833.511357



Sum of electronic and thermal Energies= -833.494440  
 Sum of electronic and thermal Enthalpies= -833.493496  
 Sum of electronic and thermal Free Energies= -833.555859  
 ωB97XD /6-311++G(d,p)-SDD/SMD//ωB97XD /6-31G(d)-LANL2DZ energy in tetrahydrofuran solvent = -833.9841362

### TS9a

| Center Number | Atomic Number | Atomic Type | Coordinates (Angstroms) |           |           |
|---------------|---------------|-------------|-------------------------|-----------|-----------|
|               |               |             | X                       | Y         | Z         |
| 1             | 6             | 0           | -0.920691               | -1.101215 | -0.608528 |
| 2             | 6             | 0           | 0.155293                | -1.134082 | -1.445041 |
| 3             | 1             | 0           | 0.168670                | -1.760439 | -2.348044 |
| 4             | 6             | 0           | -2.128501               | -1.971735 | -0.637946 |
| 5             | 1             | 0           | -2.895891               | -1.595484 | -1.338728 |
| 6             | 1             | 0           | -1.858246               | -2.989073 | -0.934481 |
| 7             | 8             | 0           | -2.681814               | -2.063915 | 0.659967  |
| 8             | 6             | 0           | -2.996106               | -0.765166 | 1.083611  |
| 9             | 1             | 0           | -3.242224               | -0.831070 | 2.147038  |
| 10            | 1             | 0           | -3.887089               | -0.402104 | 0.542922  |
| 11            | 6             | 0           | -1.862653               | 0.231817  | 0.887704  |
| 12            | 6             | 0           | -2.190885               | 1.458554  | 0.211010  |
| 13            | 1             | 0           | -1.127911               | 0.243901  | 1.688017  |
| 14            | 1             | 0           | -3.148941               | 1.496918  | -0.302919 |
| 15            | 6             | 0           | -1.292482               | 2.537411  | -0.019418 |
| 16            | 6             | 0           | 0.059912                | 2.479106  | 0.345324  |
| 17            | 1             | 0           | -1.630458               | 3.316664  | -0.698561 |
| 18            | 1             | 0           | 0.740405                | 3.231858  | -0.039025 |
| 19            | 1             | 0           | 0.376505                | 1.999215  | 1.268503  |
| 20            | 28            | 0           | -0.496423               | 0.772423  | -0.654746 |
| 21            | 6             | 0           | 1.168504                | -0.117573 | -1.178133 |
| 22            | 1             | 0           | 1.683201                | 0.250485  | -2.074453 |
| 23            | 14            | 0           | 2.367943                | -0.360188 | 0.238747  |
| 24            | 6             | 0           | 1.517065                | -0.776556 | 1.871272  |
| 25            | 1             | 0           | 1.054433                | 0.102982  | 2.333883  |
| 26            | 1             | 0           | 0.736656                | -1.531235 | 1.722386  |
| 27            | 1             | 0           | 2.244880                | -1.175892 | 2.587547  |
| 28            | 6             | 0           | 3.429931                | 1.188250  | 0.437308  |
| 29            | 1             | 0           | 4.219436                | 1.026970  | 1.180878  |
| 30            | 1             | 0           | 3.915471                | 1.450075  | -0.510232 |
| 31            | 1             | 0           | 2.839164                | 2.052633  | 0.757679  |
| 32            | 6             | 0           | 3.518293                | -1.802520 | -0.186802 |
| 33            | 1             | 0           | 4.032421                | -1.631689 | -1.140055 |
| 34            | 1             | 0           | 4.283944                | -1.948958 | 0.584801  |
| 35            | 1             | 0           | 2.952658                | -2.737394 | -0.278616 |

Zero-point correction= 0.293912 (Hartree/Particle)  
 Thermal correction to Energy= 0.311169  
 Thermal correction to Enthalpy= 0.312113  
 Thermal correction to Gibbs Free Energy= 0.250642  
 Sum of electronic and zero-point Energies= -1002.762337  
 Sum of electronic and thermal Energies= -1002.745080  
 Sum of electronic and thermal Enthalpies= -1002.744136  
 Sum of electronic and thermal Free Energies= -1002.805607  
 ωB97XD /6-311++G(d,p)-SDD/SMD//ωB97XD /6-31G(d)-LANL2DZ energy in tetrahydrofuran solvent = -1004.8902979

### INT19a

| Center Number | Atomic Number | Atomic Type | Coordinates (Angstroms) |           |           |
|---------------|---------------|-------------|-------------------------|-----------|-----------|
|               |               |             | X                       | Y         | Z         |
| 1             | 6             | 0           | 1.278544                | 0.147281  | -0.669214 |
| 2             | 6             | 0           | 0.228709                | -0.462276 | -1.525863 |
| 3             | 1             | 0           | 0.633759                | -0.906317 | -2.438019 |
| 4             | 6             | 0           | 1.829307                | 1.512902  | -1.072483 |
| 5             | 1             | 0           | 2.500354                | 1.486320  | -1.936961 |
| 6             | 1             | 0           | 0.988146                | 2.188267  | -1.295965 |

|    |    |   |           |           |           |
|----|----|---|-----------|-----------|-----------|
| 7  | 8  | 0 | 2.580775  | 1.971819  | 0.034984  |
| 8  | 6  | 0 | 1.976854  | 1.469090  | 1.217779  |
| 9  | 1  | 0 | 1.194326  | 2.152557  | 1.579057  |
| 10 | 1  | 0 | 2.761234  | 1.400881  | 1.977532  |
| 11 | 6  | 0 | 1.384190  | 0.128348  | 0.826905  |
| 12 | 6  | 0 | 2.317606  | -0.741978 | 0.021135  |
| 13 | 1  | 0 | 0.636508  | -0.334754 | 1.462679  |
| 14 | 1  | 0 | 3.340940  | -0.376463 | -0.046816 |
| 15 | 6  | 0 | 2.194412  | -2.221315 | -0.001362 |
| 16 | 6  | 0 | 1.147734  | -2.949399 | 0.385322  |
| 17 | 1  | 0 | 3.065924  | -2.739006 | -0.399270 |
| 18 | 1  | 0 | 1.161196  | -4.031925 | 0.305386  |
| 19 | 1  | 0 | 0.238871  | -2.503682 | 0.779449  |
| 20 | 6  | 0 | -1.093631 | -0.516322 | -1.328159 |
| 21 | 1  | 0 | -1.647456 | -1.019094 | -2.126535 |
| 22 | 14 | 0 | -2.205949 | 0.120624  | 0.049316  |
| 23 | 6  | 0 | -3.910621 | 0.314019  | -0.735892 |
| 24 | 1  | 0 | -4.649681 | 0.639803  | 0.004900  |
| 25 | 1  | 0 | -3.893832 | 1.059366  | -1.539125 |
| 26 | 1  | 0 | -4.264549 | -0.630344 | -1.165235 |
| 27 | 6  | 0 | -1.679742 | 1.788449  | 0.754738  |
| 28 | 1  | 0 | -2.540286 | 2.282042  | 1.221342  |
| 29 | 1  | 0 | -0.907515 | 1.681990  | 1.521450  |
| 30 | 1  | 0 | -1.293154 | 2.456151  | -0.022587 |
| 31 | 6  | 0 | -2.335839 | -1.143164 | 1.447272  |
| 32 | 1  | 0 | -3.098098 | -0.833649 | 2.171982  |
| 33 | 1  | 0 | -2.621589 | -2.128413 | 1.062473  |
| 34 | 1  | 0 | -1.393144 | -1.260826 | 1.992914  |

-----  
Zero-point correction= 0.295502 (Hartree/Particle)  
Thermal correction to Energy= 0.312202  
Thermal correction to Enthalpy= 0.313146  
Thermal correction to Gibbs Free Energy= 0.251904  
Sum of electronic and zero-point Energies= -833.509082  
Sum of electronic and thermal Energies= -833.492382  
Sum of electronic and thermal Enthalpies= -833.491438  
Sum of electronic and thermal Free Energies= -833.552680  
ωB97XD /6-311++G(d,p)-SDD/SMD//ωB97XD /6-31G(d)-LANL2DZ energy in tetrahydrofuran solvent = -833.9825423

### TS12a

-----

| Center<br>Number | Atomic<br>Number | Atomic<br>Type | Coordinates (Angstroms) |           |           |
|------------------|------------------|----------------|-------------------------|-----------|-----------|
|                  |                  |                | X                       | Y         | Z         |
| 1                | 6                | 0              | -1.269200               | -1.242680 | -0.324589 |
| 2                | 6                | 0              | 0.076237                | -1.477899 | -0.133929 |
| 3                | 1                | 0              | 0.410409                | -2.247418 | 0.579922  |
| 4                | 6                | 0              | -2.314465               | -2.019369 | 0.406440  |
| 5                | 1                | 0              | -2.152340               | -3.089097 | 0.245289  |
| 6                | 1                | 0              | -2.325080               | -1.834624 | 1.497819  |
| 7                | 8                | 0              | -3.595500               | -1.724048 | -0.120710 |
| 8                | 6                | 0              | -3.784269               | -0.346437 | -0.002873 |
| 9                | 1                | 0              | -3.946590               | -0.071553 | 1.054314  |
| 10               | 1                | 0              | -4.686350               | -0.089882 | -0.566554 |
| 11               | 6                | 0              | -2.619066               | 0.474403  | -0.536742 |
| 12               | 6                | 0              | -2.142319               | 1.548142  | 0.264968  |
| 13               | 1                | 0              | -2.561712               | 0.574126  | -1.617057 |
| 14               | 1                | 0              | -2.398616               | 1.587854  | 1.322250  |
| 15               | 6                | 0              | -1.097820               | 2.403139  | -0.271390 |
| 16               | 6                | 0              | 0.067670                | 2.601148  | 0.447394  |
| 17               | 1                | 0              | -1.120131               | 2.667089  | -1.328960 |
| 18               | 1                | 0              | 0.910140                | 3.112011  | -0.006845 |
| 19               | 1                | 0              | 0.088756                | 2.498675  | 1.530888  |
| 20               | 28               | 0              | -0.454705               | 0.563810  | 0.008140  |
| 21               | 6                | 0              | 1.029694                | -0.543450 | -0.682238 |
| 22               | 1                | 0              | 0.850978                | -0.263573 | -1.724538 |
| 23               | 14               | 0              | 2.770053                | -0.368678 | -0.041544 |

|    |   |   |          |           |           |
|----|---|---|----------|-----------|-----------|
| 24 | 6 | 0 | 2.723989 | -0.076266 | 1.824511  |
| 25 | 1 | 0 | 3.730245 | -0.009964 | 2.254326  |
| 26 | 1 | 0 | 2.194388 | 0.855675  | 2.054679  |
| 27 | 1 | 0 | 2.196848 | -0.891812 | 2.334683  |
| 28 | 6 | 0 | 3.589566 | 1.097646  | -0.901860 |
| 29 | 1 | 0 | 4.624403 | 1.230800  | -0.566134 |
| 30 | 1 | 0 | 3.608230 | 0.954690  | -1.988698 |
| 31 | 1 | 0 | 3.048334 | 2.028203  | -0.696953 |
| 32 | 6 | 0 | 3.783526 | -1.929940 | -0.376490 |
| 33 | 1 | 0 | 3.873918 | -2.119782 | -1.452002 |
| 34 | 1 | 0 | 4.795596 | -1.844653 | 0.037171  |
| 35 | 1 | 0 | 3.312302 | -2.810203 | 0.076567  |

-----  
Zero-point correction= 0.291776 (Hartree/Particle)  
Thermal correction to Energy= 0.309976  
Thermal correction to Enthalpy= 0.310920  
Thermal correction to Gibbs Free Energy= 0.245986  
Sum of electronic and zero-point Energies= -1002.748354  
Sum of electronic and thermal Energies= -1002.730155  
Sum of electronic and thermal Enthalpies= -1002.729211  
Sum of electronic and thermal Free Energies= -1002.794145  
ωB97XD /6-311++G(d,p)-SDD/SMD//ωB97XD /6-31G(d)-LANL2DZ energy in tetrahydrofuran solvent = -1004.8753022

### INT13a

| Center Number | Atomic Number | Atomic Type | Coordinates (Angstroms) |           |           |
|---------------|---------------|-------------|-------------------------|-----------|-----------|
|               |               |             | X                       | Y         | Z         |
| 1             | 6             | 0           | -1.434457               | -0.407150 | 0.312928  |
| 2             | 6             | 0           | 0.027836                | -0.289237 | 0.541734  |
| 3             | 1             | 0           | 0.307214                | -0.160867 | 1.589714  |
| 4             | 6             | 0           | -2.183789               | -1.541121 | 1.007512  |
| 5             | 1             | 0           | -1.593215               | -2.467933 | 0.927730  |
| 6             | 1             | 0           | -2.403201               | -1.351355 | 2.062975  |
| 7             | 8             | 0           | -3.420988               | -1.662728 | 0.329601  |
| 8             | 6             | 0           | -3.210709               | -1.309728 | -1.029263 |
| 9             | 1             | 0           | -4.170699               | -0.968791 | -1.427975 |
| 10            | 1             | 0           | -2.869620               | -2.177086 | -1.616517 |
| 11            | 6             | 0           | -2.133740               | -0.244772 | -1.003073 |
| 12            | 6             | 0           | -2.306877               | 0.821162  | 0.059202  |
| 13            | 1             | 0           | -1.598720               | -0.003823 | -1.916516 |
| 14            | 1             | 0           | -3.267061               | 0.830906  | 0.573674  |
| 15            | 6             | 0           | -1.684566               | 2.147261  | -0.132992 |
| 16            | 6             | 0           | -2.235465               | 3.294813  | 0.257725  |
| 17            | 1             | 0           | -0.713464               | 2.159303  | -0.626494 |
| 18            | 1             | 0           | -1.741229               | 4.246964  | 0.091594  |
| 19            | 1             | 0           | -3.201483               | 3.323935  | 0.756484  |
| 20            | 6             | 0           | 0.981613                | -0.315236 | -0.396424 |
| 21            | 1             | 0           | 0.657153                | -0.451491 | -1.431853 |
| 22            | 14            | 0           | 2.814295                | -0.113343 | -0.056298 |
| 23            | 6             | 0           | 3.096502                | 0.085217  | 1.795993  |
| 24            | 1             | 0           | 2.746853                | -0.790910 | 2.353444  |
| 25            | 1             | 0           | 4.164483                | 0.208835  | 2.008339  |
| 26            | 1             | 0           | 2.577028                | 0.965660  | 2.190290  |
| 27            | 6             | 0           | 3.738152                | -1.630845 | -0.688522 |
| 28            | 1             | 0           | 3.568496                | -1.782726 | -1.760519 |
| 29            | 1             | 0           | 4.818240                | -1.523640 | -0.535352 |
| 30            | 1             | 0           | 3.413145                | -2.538107 | -0.167648 |
| 31            | 6             | 0           | 3.439085                | 1.416274  | -0.966292 |
| 32            | 1             | 0           | 3.270082                | 1.332974  | -2.045939 |
| 33            | 1             | 0           | 2.927593                | 2.319845  | -0.616511 |
| 34            | 1             | 0           | 4.514670                | 1.557116  | -0.808724 |

-----  
Zero-point correction= 0.294838 (Hartree/Particle)  
Thermal correction to Energy= 0.311987  
Thermal correction to Enthalpy= 0.312931  
Thermal correction to Gibbs Free Energy= 0.249483

Sum of electronic and zero-point Energies= -833.514891  
 Sum of electronic and thermal Energies= -833.497742  
 Sum of electronic and thermal Enthalpies= -833.496798  
 Sum of electronic and thermal Free Energies= -833.560246  
 ωB97XD /6-311++G(d,p)-SDD/SMD//ωB97XD /6-31G(d)-LANL2DZ energy in tetrahydrofuran solvent = -833.9878097

**(1R, 5R)-3a**

| Center Number | Atomic Number | Atomic Type | Coordinates (Angstroms) |           |           |
|---------------|---------------|-------------|-------------------------|-----------|-----------|
|               |               |             | X                       | Y         | Z         |
| 1             | 6             | 0           | 1.414872                | -0.593022 | 0.559287  |
| 2             | 6             | 0           | 0.370537                | -0.648707 | 1.379907  |
| 3             | 1             | 0           | 0.437711                | -1.297422 | 2.253498  |
| 4             | 6             | 0           | 2.738019                | -1.302021 | 0.727510  |
| 5             | 1             | 0           | 3.067609                | -1.380280 | 1.766554  |
| 6             | 1             | 0           | 2.700835                | -2.317903 | 0.294340  |
| 7             | 8             | 0           | 3.665756                | -0.501014 | 0.022444  |
| 8             | 6             | 0           | 2.987803                | -0.042732 | -1.129735 |
| 9             | 1             | 0           | 3.008702                | -0.816384 | -1.914108 |
| 10            | 1             | 0           | 3.514489                | 0.840740  | -1.499443 |
| 11            | 6             | 0           | 1.525986                | 0.241926  | -0.702295 |
| 12            | 6             | 0           | 1.214125                | 1.710141  | -0.532817 |
| 13            | 1             | 0           | 0.852414                | -0.163490 | -1.472228 |
| 14            | 1             | 0           | 1.784214                | 2.371802  | -1.184830 |
| 15            | 6             | 0           | 0.312845                | 2.280505  | 0.267142  |
| 16            | 6             | 0           | -0.633527               | 1.672258  | 1.271860  |
| 17            | 1             | 0           | 0.246662                | 3.367703  | 0.219249  |
| 18            | 1             | 0           | -0.251924               | 1.927463  | 2.272239  |
| 19            | 1             | 0           | -1.592782               | 2.203971  | 1.188183  |
| 20            | 6             | 0           | -0.897509               | 0.151463  | 1.218705  |
| 21            | 1             | 0           | -1.521446               | -0.063821 | 2.097237  |
| 22            | 14            | 0           | -2.036012               | -0.392564 | -0.232533 |
| 23            | 6             | 0           | -1.581416               | -2.133115 | -0.793842 |
| 24            | 1             | 0           | -0.568988               | -2.169718 | -1.210314 |
| 25            | 1             | 0           | -1.616219               | -2.840290 | 0.042471  |
| 26            | 1             | 0           | -2.277402               | -2.488029 | -1.562531 |
| 27            | 6             | 0           | -2.000201               | 0.788204  | -1.704410 |
| 28            | 1             | 0           | -2.752616               | 0.477023  | -2.439118 |
| 29            | 1             | 0           | -2.238880               | 1.812764  | -1.398646 |
| 30            | 1             | 0           | -1.029097               | 0.817923  | -2.206425 |
| 31            | 6             | 0           | -3.798147               | -0.392535 | 0.447897  |
| 32            | 1             | 0           | -4.527131               | -0.638330 | -0.332521 |
| 33            | 1             | 0           | -3.913310               | -1.125255 | 1.255007  |
| 34            | 1             | 0           | -4.065054               | 0.591353  | 0.852048  |

Zero-point correction= 0.298324 (Hartree/Particle)  
 Thermal correction to Energy= 0.313970  
 Thermal correction to Enthalpy= 0.314915  
 Thermal correction to Gibbs Free Energy= 0.256432  
 Sum of electronic and zero-point Energies= -833.539899  
 Sum of electronic and thermal Energies= -833.524253  
 Sum of electronic and thermal Enthalpies= -833.523309  
 Sum of electronic and thermal Free Energies= -833.581791  
 ωB97XD /6-311++G(d,p)-SDD/SMD//ωB97XD /6-31G(d)-LANL2DZ energy in tetrahydrofuran solvent = -834.0174712

**(1S, 5R)-3a**

| Center Number | Atomic Number | Atomic Type | Coordinates (Angstroms) |           |           |
|---------------|---------------|-------------|-------------------------|-----------|-----------|
|               |               |             | X                       | Y         | Z         |
| 1             | 6             | 0           | 1.468673                | -0.593569 | -0.254232 |
| 2             | 6             | 0           | 0.226378                | -0.592993 | -0.736877 |
| 3             | 1             | 0           | -0.092343               | -1.500983 | -1.254220 |
| 4             | 6             | 0           | 2.430019                | -1.766097 | -0.361771 |
| 5             | 1             | 0           | 2.032321                | -2.695448 | 0.057137  |
| 6             | 1             | 0           | 2.703693                | -1.950900 | -1.414122 |

|    |    |   |           |           |           |
|----|----|---|-----------|-----------|-----------|
| 7  | 8  | 0 | 3.571546  | -1.402221 | 0.391908  |
| 8  | 6  | 0 | 3.681257  | 0.001139  | 0.299446  |
| 9  | 1  | 0 | 4.117334  | 0.296477  | -0.670982 |
| 10 | 1  | 0 | 4.344046  | 0.342736  | 1.097961  |
| 11 | 6  | 0 | 2.244113  | 0.534828  | 0.410912  |
| 12 | 6  | 0 | 2.029715  | 1.880075  | -0.233751 |
| 13 | 1  | 0 | 1.977332  | 0.580769  | 1.477691  |
| 14 | 1  | 0 | 2.904761  | 2.398189  | -0.623935 |
| 15 | 6  | 0 | 0.819896  | 2.420742  | -0.360838 |
| 16 | 6  | 0 | -0.423650 | 1.737971  | 0.150430  |
| 17 | 1  | 0 | 0.708574  | 3.382245  | -0.857788 |
| 18 | 1  | 0 | -0.268795 | 1.454429  | 1.201611  |
| 19 | 1  | 0 | -1.258105 | 2.447195  | 0.144350  |
| 20 | 6  | 0 | -0.829604 | 0.479601  | -0.648913 |
| 21 | 1  | 0 | -1.082910 | 0.787177  | -1.677406 |
| 22 | 14 | 0 | -2.424909 | -0.285619 | 0.075831  |
| 23 | 6  | 0 | -2.069360 | -0.920133 | 1.813929  |
| 24 | 1  | 0 | -1.789522 | -0.104303 | 2.489890  |
| 25 | 1  | 0 | -2.946590 | -1.418138 | 2.241938  |
| 26 | 1  | 0 | -1.243380 | -1.639769 | 1.801999  |
| 27 | 6  | 0 | -2.991641 | -1.711177 | -1.022959 |
| 28 | 1  | 0 | -3.943579 | -2.119031 | -0.663923 |
| 29 | 1  | 0 | -3.140735 | -1.383437 | -2.058163 |
| 30 | 1  | 0 | -2.266207 | -2.531860 | -1.032007 |
| 31 | 6  | 0 | -3.780714 | 1.025944  | 0.130415  |
| 32 | 1  | 0 | -3.923706 | 1.494799  | -0.850036 |
| 33 | 1  | 0 | -4.736968 | 0.580326  | 0.427445  |
| 34 | 1  | 0 | -3.549349 | 1.817978  | 0.850908  |

-----  
Zero-point correction= 0.297681 (Hartree/Particle)  
Thermal correction to Energy= 0.313598  
Thermal correction to Enthalpy= 0.314542  
Thermal correction to Gibbs Free Energy= 0.254940  
Sum of electronic and zero-point Energies= -833.544514  
Sum of electronic and thermal Energies= -833.528597  
Sum of electronic and thermal Enthalpies= -833.527653  
Sum of electronic and thermal Free Energies= -833.587256  
ωB97XD /6-311++G(d,p)-SDD/SMD//ωB97XD /6-31G(d)-LANL2DZ energy in tetrahydrofuran solvent = -834.0213737

**(1S, 5S)-3a**

-----

| Center Number | Atomic Number | Atomic Type | Coordinates (Angstroms) |           |           |
|---------------|---------------|-------------|-------------------------|-----------|-----------|
|               |               |             | X                       | Y         | Z         |
| 1             | 6             | 0           | 1.540171                | 0.579856  | -0.508854 |
| 2             | 6             | 0           | 0.311284                | 0.893571  | -0.919886 |
| 3             | 1             | 0           | 0.112519                | 1.952785  | -1.099375 |
| 4             | 6             | 0           | 2.637982                | 1.604994  | -0.265906 |
| 5             | 1             | 0           | 2.928958                | 2.152756  | -1.168607 |
| 6             | 1             | 0           | 2.323227                | 2.338439  | 0.493454  |
| 7             | 8             | 0           | 3.769573                | 0.879444  | 0.183687  |
| 8             | 6             | 0           | 3.293318                | -0.315250 | 0.763077  |
| 9             | 1             | 0           | 2.919074                | -0.140285 | 1.787014  |
| 10            | 1             | 0           | 4.122869                | -1.025353 | 0.808923  |
| 11            | 6             | 0           | 2.139978                | -0.767267 | -0.142238 |
| 12            | 6             | 0           | 1.221110                | -1.782704 | 0.482200  |
| 13            | 1             | 0           | 2.589673                | -1.199405 | -1.050870 |
| 14            | 1             | 0           | 1.567120                | -2.265485 | 1.395506  |
| 15            | 6             | 0           | 0.044235                | -2.126101 | -0.037015 |
| 16            | 6             | 0           | -0.515741               | -1.501796 | -1.291042 |
| 17            | 1             | 0           | -0.558367               | -2.877806 | 0.470166  |
| 18            | 1             | 0           | 0.218238                | -1.600852 | -2.104175 |
| 19            | 1             | 0           | -1.408130               | -2.050054 | -1.610825 |
| 20            | 6             | 0           | -0.872214               | -0.008821 | -1.135444 |
| 21            | 1             | 0           | -1.355535               | 0.309862  | -2.072841 |
| 22            | 14            | 0           | -2.184443               | 0.342703  | 0.216210  |
| 23            | 6             | 0           | -2.848842               | 2.085359  | -0.075335 |

|    |   |   |           |           |           |
|----|---|---|-----------|-----------|-----------|
| 24 | 1 | 0 | -2.058629 | 2.837379  | 0.030354  |
| 25 | 1 | 0 | -3.280179 | 2.190947  | -1.077438 |
| 26 | 1 | 0 | -3.632511 | 2.329722  | 0.650886  |
| 27 | 6 | 0 | -1.449300 | 0.246616  | 1.947720  |
| 28 | 1 | 0 | -2.136373 | 0.675370  | 2.686574  |
| 29 | 1 | 0 | -1.237059 | -0.786842 | 2.236976  |
| 30 | 1 | 0 | -0.505129 | 0.800302  | 1.995163  |
| 31 | 6 | 0 | -3.589634 | -0.904624 | 0.036947  |
| 32 | 1 | 0 | -4.391429 | -0.695516 | 0.754256  |
| 33 | 1 | 0 | -4.026220 | -0.875276 | -0.968039 |
| 34 | 1 | 0 | -3.240568 | -1.927082 | 0.221119  |

-----  
Zero-point correction= 0.297834 (Hartree/Particle)  
Thermal correction to Energy= 0.313682  
Thermal correction to Enthalpy= 0.314627  
Thermal correction to Gibbs Free Energy= 0.254972  
Sum of electronic and zero-point Energies= -833.546521  
Sum of electronic and thermal Energies= -833.530673  
Sum of electronic and thermal Enthalpies= -833.529729  
Sum of electronic and thermal Free Energies= -833.589383  
ωB97XD /6-311++G(d,p)-SDD/SMD//ωB97XD /6-31G(d)-LANL2DZ energy in tetrahydrofuran solvent = -834.0213737

## 2b

| Center<br>Number | Atomic<br>Number | Atomic<br>Type | Coordinates (Angstroms) |           |           |
|------------------|------------------|----------------|-------------------------|-----------|-----------|
|                  |                  |                | X                       | Y         | Z         |
| 1                | 6                | 0              | 0.500194                | 0.396019  | -0.000002 |
| 2                | 7                | 0              | 0.848155                | 1.662358  | -0.000045 |
| 3                | 7                | 0              | 1.120891                | 2.760093  | -0.000112 |
| 4                | 6                | 0              | -0.942959               | 0.077722  | 0.000001  |
| 5                | 6                | 0              | -1.386436               | -1.251494 | -0.000117 |
| 6                | 6                | 0              | -1.897589               | 1.104599  | 0.000116  |
| 7                | 6                | 0              | -2.748055               | -1.532580 | -0.000120 |
| 8                | 1                | 0              | -0.662530               | -2.055434 | -0.000196 |
| 9                | 6                | 0              | -3.255275               | 0.811926  | 0.000107  |
| 10               | 1                | 0              | -1.589396               | 2.146656  | 0.000222  |
| 11               | 6                | 0              | -3.690456               | -0.509668 | -0.000012 |
| 12               | 1                | 0              | -3.070977               | -2.569570 | -0.000214 |
| 13               | 1                | 0              | -3.974983               | 1.625039  | 0.000195  |
| 14               | 1                | 0              | -4.751866               | -0.737545 | -0.000019 |
| 15               | 6                | 0              | 1.620351                | -0.551569 | 0.000058  |
| 16               | 8                | 0              | 1.520414                | -1.758543 | 0.000154  |
| 17               | 8                | 0              | 2.803543                | 0.094151  | -0.000039 |
| 18               | 6                | 0              | 3.955232                | -0.747847 | -0.000002 |
| 19               | 1                | 0              | 4.808614                | -0.070610 | -0.000114 |
| 20               | 1                | 0              | 3.968098                | -1.381505 | 0.890051  |
| 21               | 1                | 0              | 3.968016                | -1.381700 | -0.889915 |

-----  
Zero-point correction= 0.160592 (Hartree/Particle)  
Thermal correction to Energy= 0.172220  
Thermal correction to Enthalpy= 0.173164  
Thermal correction to Gibbs Free Energy= 0.120577  
Sum of electronic and zero-point Energies= -607.314533  
Sum of electronic and thermal Energies= -607.302905  
Sum of electronic and thermal Enthalpies= -607.301961  
Sum of electronic and thermal Free Energies= -607.354548  
ωB97XD /6-311++G(d,p)-SDD/SMD//ωB97XD /6-31G(d)-LANL2DZ energy in chloroform solvent = -607.6401776

## INT1b

| Center<br>Number | Atomic<br>Number | Atomic<br>Type | Coordinates (Angstroms) |          |          |
|------------------|------------------|----------------|-------------------------|----------|----------|
|                  |                  |                | X                       | Y        | Z        |
| 1                | 6                | 0              | 1.057784                | 3.169762 | 0.905780 |
| 2                | 6                | 0              | 2.329417                | 2.716323 | 1.033807 |
| 3                | 6                | 0              | 1.101891                | 1.046784 | 0.193600 |

|    |    |   |           |           |           |
|----|----|---|-----------|-----------|-----------|
| 4  | 7  | 0 | 0.317092  | 2.124650  | 0.385744  |
| 5  | 1  | 0 | 0.612762  | 4.125960  | 1.130246  |
| 6  | 1  | 0 | 3.226361  | 3.193653  | 1.395040  |
| 7  | 7  | 0 | 2.334276  | 1.405990  | 0.587973  |
| 8  | 79 | 0 | 0.420465  | -0.697152 | -0.551211 |
| 9  | 6  | 0 | -1.085057 | 2.120172  | 0.061166  |
| 10 | 6  | 0 | -1.992772 | 1.689792  | 1.033329  |
| 11 | 6  | 0 | -1.466822 | 2.456088  | -1.241493 |
| 12 | 6  | 0 | -3.334584 | 1.611125  | 0.667911  |
| 13 | 6  | 0 | -2.820377 | 2.352132  | -1.559267 |
| 14 | 6  | 0 | -3.765068 | 1.933528  | -0.620546 |
| 15 | 1  | 0 | -4.056270 | 1.275589  | 1.407002  |
| 16 | 1  | 0 | -3.144069 | 2.603198  | -2.566428 |
| 17 | 6  | 0 | 3.477233  | 0.534251  | 0.529529  |
| 18 | 6  | 0 | 3.773446  | -0.250953 | 1.646079  |
| 19 | 6  | 0 | 4.216008  | 0.485803  | -0.656298 |
| 20 | 6  | 0 | 4.873434  | -1.101632 | 1.556079  |
| 21 | 6  | 0 | 5.306145  | -0.380077 | -0.694748 |
| 22 | 6  | 0 | 5.652925  | -1.174600 | 0.400393  |
| 23 | 1  | 0 | 5.129067  | -1.722588 | 2.410935  |
| 24 | 1  | 0 | 5.900489  | -0.436484 | -1.603432 |
| 25 | 6  | 0 | -0.448840 | 2.888133  | -2.265106 |
| 26 | 1  | 0 | 0.096228  | 3.780285  | -1.938330 |
| 27 | 1  | 0 | 0.295331  | 2.102718  | -2.444436 |
| 28 | 1  | 0 | -0.930349 | 3.119335  | -3.217837 |
| 29 | 6  | 0 | -5.225144 | 1.838373  | -0.978926 |
| 30 | 1  | 0 | -5.706253 | 1.008047  | -0.452683 |
| 31 | 1  | 0 | -5.752477 | 2.756747  | -0.696707 |
| 32 | 1  | 0 | -5.368053 | 1.691778  | -2.053143 |
| 33 | 6  | 0 | -1.536578 | 1.293598  | 2.413368  |
| 34 | 1  | 0 | -2.386496 | 0.967686  | 3.017432  |
| 35 | 1  | 0 | -0.814600 | 0.469202  | 2.371069  |
| 36 | 1  | 0 | -1.047377 | 2.125744  | 2.931460  |
| 37 | 6  | 0 | 3.826775  | 1.313979  | -1.853900 |
| 38 | 1  | 0 | 2.888627  | 0.951742  | -2.292432 |
| 39 | 1  | 0 | 3.677522  | 2.367036  | -1.592975 |
| 40 | 1  | 0 | 4.596809  | 1.263901  | -2.626921 |
| 41 | 6  | 0 | 6.860315  | -2.074132 | 0.341030  |
| 42 | 1  | 0 | 6.798911  | -2.876420 | 1.081346  |
| 43 | 1  | 0 | 6.972256  | -2.527819 | -0.648252 |
| 44 | 1  | 0 | 7.773918  | -1.504127 | 0.545704  |
| 45 | 6  | 0 | 2.923341  | -0.190056 | 2.888927  |
| 46 | 1  | 0 | 2.938024  | 0.808218  | 3.340312  |
| 47 | 1  | 0 | 1.876666  | -0.429562 | 2.666527  |
| 48 | 1  | 0 | 3.279845  | -0.900869 | 3.637751  |
| 49 | 6  | 0 | -1.156839 | -2.069932 | -1.461944 |
| 50 | 6  | 0 | -0.134612 | -2.743845 | -1.348847 |
| 51 | 1  | 0 | 0.622368  | -3.503303 | -1.373847 |
| 52 | 6  | 0 | -2.503184 | -1.453726 | -1.665198 |
| 53 | 1  | 0 | -2.718390 | -0.770298 | -0.830646 |
| 54 | 1  | 0 | -2.478252 | -0.866601 | -2.587085 |
| 55 | 8  | 0 | -3.472014 | -2.441813 | -1.813145 |
| 56 | 6  | 0 | -3.862003 | -3.060354 | -0.584995 |
| 57 | 1  | 0 | -2.982740 | -3.474309 | -0.069268 |
| 58 | 1  | 0 | -4.494117 | -3.896145 | -0.895758 |
| 59 | 6  | 0 | -4.616688 | -2.126571 | 0.310668  |
| 60 | 6  | 0 | -4.250868 | -1.831143 | 1.563862  |
| 61 | 1  | 0 | -5.529112 | -1.701543 | -0.106833 |
| 62 | 1  | 0 | -3.337490 | -2.266873 | 1.972779  |
| 63 | 6  | 0 | -5.022449 | -0.973224 | 2.458771  |
| 64 | 6  | 0 | -4.668744 | -0.701777 | 3.718994  |
| 65 | 1  | 0 | -5.942197 | -0.551025 | 2.054612  |
| 66 | 1  | 0 | -5.277368 | -0.070362 | 4.357921  |
| 67 | 1  | 0 | -3.768288 | -1.124390 | 4.159573  |

-----  
Zero-point correction= 0.567230 (Hartree/Particle)  
Thermal correction to Energy= 0.603379

Thermal correction to Enthalpy= 0.604323  
 Thermal correction to Gibbs Free Energy= 0.495595  
 Sum of electronic and zero-point Energies= -1444.509900  
 Sum of electronic and thermal Energies= -1444.473751  
 Sum of electronic and thermal Enthalpies= -1444.472807  
 Sum of electronic and thermal Free Energies= -1444.581535  
 ωB97XD /6-311++G(d,p)-SDD/SMD//ωB97XD /6-31G(d)-LANL2DZ energy in chloroform solvent = -1445.8266075

## INT2b

| Center<br>Number | Atomic<br>Number | Atomic<br>Type | Coordinates (Angstroms) |           |           |
|------------------|------------------|----------------|-------------------------|-----------|-----------|
|                  |                  |                | X                       | Y         | Z         |
| 1                | 6                | 0              | -0.109468               | -3.875945 | -0.686846 |
| 2                | 6                | 0              | -1.443390               | -3.635345 | -0.746319 |
| 3                | 6                | 0              | -0.437418               | -1.728285 | -0.144143 |
| 4                | 7                | 0              | 0.491631                | -2.686459 | -0.316214 |
| 5                | 1                | 0              | 0.463110                | -4.770207 | -0.874865 |
| 6                | 1                | 0              | -2.273553               | -4.276329 | -0.997264 |
| 7                | 7                | 0              | -1.623083               | -2.305404 | -0.409311 |
| 8                | 79               | 0              | -0.073580               | 0.195482  | 0.310822  |
| 9                | 6                | 0              | 1.899683                | -2.427318 | -0.172029 |
| 10               | 6                | 0              | 2.486260                | -2.612825 | 1.084478  |
| 11               | 6                | 0              | 2.596616                | -1.912449 | -1.267439 |
| 12               | 6                | 0              | 3.831333                | -2.280946 | 1.219920  |
| 13               | 6                | 0              | 3.943610                | -1.600958 | -1.081323 |
| 14               | 6                | 0              | 4.576116                | -1.779820 | 0.148110  |
| 15               | 1                | 0              | 4.312490                | -2.416564 | 2.185467  |
| 16               | 1                | 0              | 4.507630                | -1.200174 | -1.919767 |
| 17               | 6                | 0              | -2.861067               | -1.572741 | -0.382198 |
| 18               | 6                | 0              | -3.592751               | -1.542125 | 0.808317  |
| 19               | 6                | 0              | -3.229535               | -0.852793 | -1.521572 |
| 20               | 6                | 0              | -4.746929               | -0.763184 | 0.831457  |
| 21               | 6                | 0              | -4.393362               | -0.088357 | -1.447456 |
| 22               | 6                | 0              | -5.162844               | -0.033056 | -0.284382 |
| 23               | 1                | 0              | -5.334952               | -0.721951 | 1.745149  |
| 24               | 1                | 0              | -4.705360               | 0.477554  | -2.321878 |
| 25               | 6                | 0              | 1.913176                | -1.638892 | -2.581964 |
| 26               | 1                | 0              | 1.214420                | -2.433675 | -2.860041 |
| 27               | 1                | 0              | 1.342498                | -0.702861 | -2.528836 |
| 28               | 1                | 0              | 2.646633                | -1.533769 | -3.384816 |
| 29               | 6                | 0              | 6.038446                | -1.458839 | 0.322407  |
| 30               | 1                | 0              | 6.636465                | -2.377212 | 0.325140  |
| 31               | 1                | 0              | 6.411491                | -0.826691 | -0.488765 |
| 32               | 1                | 0              | 6.223115                | -0.946667 | 1.271951  |
| 33               | 6                | 0              | 1.675105                | -3.111092 | 2.252187  |
| 34               | 1                | 0              | 2.303761                | -3.239230 | 3.136256  |
| 35               | 1                | 0              | 0.876800                | -2.402513 | 2.504420  |
| 36               | 1                | 0              | 1.197724                | -4.072676 | 2.035828  |
| 37               | 6                | 0              | -2.381293               | -0.865866 | -2.767062 |
| 38               | 1                | 0              | -1.453563               | -0.300735 | -2.614540 |
| 39               | 1                | 0              | -2.100225               | -1.883405 | -3.058050 |
| 40               | 1                | 0              | -2.913394               | -0.408698 | -3.604293 |
| 41               | 6                | 0              | -6.430558               | 0.781037  | -0.237897 |
| 42               | 1                | 0              | -7.302862               | 0.146206  | -0.431132 |
| 43               | 1                | 0              | -6.573757               | 1.242064  | 0.744232  |
| 44               | 1                | 0              | -6.427124               | 1.572137  | -0.993199 |
| 45               | 6                | 0              | -3.122944               | -2.291028 | 2.028206  |
| 46               | 1                | 0              | -2.963179               | -3.353843 | 1.818213  |
| 47               | 1                | 0              | -2.171219               | -1.885745 | 2.393236  |
| 48               | 1                | 0              | -3.854098               | -2.214363 | 2.836179  |
| 49               | 6                | 0              | 0.395067                | 2.299524  | 0.560800  |
| 50               | 7                | 0              | 0.406064                | 2.553707  | 1.936719  |
| 51               | 7                | 0              | 0.462626                | 2.716081  | 3.033665  |
| 52               | 6                | 0              | 1.750501                | 2.638941  | -0.031205 |
| 53               | 6                | 0              | 1.955001                | 3.872331  | -0.654621 |
| 54               | 6                | 0              | 2.806930                | 1.727043  | 0.067035  |



|    |   |   |           |          |           |
|----|---|---|-----------|----------|-----------|
| 55 | 6 | 0 | 3.200866  | 4.179493 | -1.190035 |
| 56 | 1 | 0 | 1.140782  | 4.582944 | -0.746539 |
| 57 | 6 | 0 | 4.053067  | 2.045290 | -0.460583 |
| 58 | 1 | 0 | 2.664981  | 0.761342 | 0.546821  |
| 59 | 6 | 0 | 4.250716  | 3.269441 | -1.092616 |
| 60 | 1 | 0 | 3.350745  | 5.134454 | -1.682777 |
| 61 | 1 | 0 | 4.862964  | 1.327174 | -0.382282 |
| 62 | 1 | 0 | 5.221021  | 3.514385 | -1.512638 |
| 63 | 6 | 0 | -0.860180 | 2.893433 | -0.062388 |
| 64 | 8 | 0 | -0.959156 | 3.114804 | -1.239882 |
| 65 | 8 | 0 | -1.820768 | 3.047998 | 0.848752  |
| 66 | 6 | 0 | -3.118924 | 3.386485 | 0.331540  |
| 67 | 1 | 0 | -3.752044 | 3.512923 | 1.207462  |
| 68 | 1 | 0 | -3.066258 | 4.309239 | -0.248203 |
| 69 | 1 | 0 | -3.484458 | 2.569007 | -0.294677 |

-----  
Zero-point correction= 0.567836 (Hartree/Particle)  
Thermal correction to Energy= 0.606041  
Thermal correction to Enthalpy= 0.606986  
Thermal correction to Gibbs Free Energy= 0.493037  
Sum of electronic and zero-point Energies= -1666.149528  
Sum of electronic and thermal Energies= -1666.111323  
Sum of electronic and thermal Enthalpies= -1666.110379  
Sum of electronic and thermal Free Energies= -1666.224327  
**ωB97XD /6-311++G(d,p)-SDD/SMD//ωB97XD /6-31G(d)-LANL2DZ energy in chloroform solvent = -1667.516362**

#### TS1b

-----

| Center Number | Atomic Number | Atomic Type | Coordinates (Angstroms) |           |           |
|---------------|---------------|-------------|-------------------------|-----------|-----------|
|               |               |             | X                       | Y         | Z         |
| 1             | 6             | 0           | -0.505351               | -3.913660 | -0.423369 |
| 2             | 6             | 0           | -1.820216               | -3.581475 | -0.443055 |
| 3             | 6             | 0           | -0.653168               | -1.696548 | -0.108018 |
| 4             | 7             | 0           | 0.194588                | -2.739152 | -0.217154 |
| 5             | 1             | 0           | -0.006635               | -4.862830 | -0.538228 |
| 6             | 1             | 0           | -2.707346               | -4.179601 | -0.577939 |
| 7             | 7             | 0           | -1.887410               | -2.213487 | -0.247209 |
| 8             | 79            | 0           | -0.077382               | 0.231635  | 0.146387  |
| 9             | 6             | 0           | 1.622148                | -2.588148 | -0.127289 |
| 10            | 6             | 0           | 2.223030                | -2.699249 | 1.131519  |
| 11            | 6             | 0           | 2.335118                | -2.259639 | -1.282256 |
| 12            | 6             | 0           | 3.596287                | -2.485356 | 1.209184  |
| 13            | 6             | 0           | 3.709948                | -2.058970 | -1.152333 |
| 14            | 6             | 0           | 4.355893                | -2.172571 | 0.078065  |
| 15            | 1             | 0           | 4.088501                | -2.569572 | 2.175023  |
| 16            | 1             | 0           | 4.287372                | -1.804884 | -2.037729 |
| 17            | 6             | 0           | -3.082158               | -1.413784 | -0.209543 |
| 18            | 6             | 0           | -3.706089               | -1.207588 | 1.023070  |
| 19            | 6             | 0           | -3.529730               | -0.829983 | -1.397416 |
| 20            | 6             | 0           | -4.838442               | -0.396094 | 1.040627  |
| 21            | 6             | 0           | -4.665145               | -0.025548 | -1.326915 |
| 22            | 6             | 0           | -5.333869               | 0.197377  | -0.121776 |
| 23            | 1             | 0           | -5.345065               | -0.221509 | 1.986620  |
| 24            | 1             | 0           | -5.038193               | 0.437913  | -2.236949 |
| 25            | 6             | 0           | 1.643020                | -2.075938 | -2.607697 |
| 26            | 1             | 0           | 0.920091                | -2.872961 | -2.807930 |
| 27            | 1             | 0           | 1.095018                | -1.125615 | -2.629195 |
| 28            | 1             | 0           | 2.368074                | -2.060544 | -3.424564 |
| 29            | 6             | 0           | 5.847194                | -1.984456 | 0.193025  |
| 30            | 1             | 0           | 6.348500                | -2.951052 | 0.316020  |
| 31            | 1             | 0           | 6.263439                | -1.509851 | -0.700330 |
| 32            | 1             | 0           | 6.106436                | -1.372304 | 1.063283  |
| 33            | 6             | 0           | 1.402777                | -3.011606 | 2.356134  |
| 34            | 1             | 0           | 2.034341                | -3.058811 | 3.246252  |
| 35            | 1             | 0           | 0.636765                | -2.244634 | 2.522416  |
| 36            | 1             | 0           | 0.883627                | -3.971252 | 2.259827  |

|    |   |   |           |           |           |
|----|---|---|-----------|-----------|-----------|
| 37 | 6 | 0 | -2.789185 | -1.033971 | -2.693777 |
| 38 | 1 | 0 | -1.805919 | -0.548801 | -2.662041 |
| 39 | 1 | 0 | -2.621396 | -2.095603 | -2.904062 |
| 40 | 1 | 0 | -3.345341 | -0.606884 | -3.531251 |
| 41 | 6 | 0 | -6.581340 | 1.042406  | -0.083197 |
| 42 | 1 | 0 | -7.468813 | 0.426441  | -0.268986 |
| 43 | 1 | 0 | -6.711898 | 1.520599  | 0.891920  |
| 44 | 1 | 0 | -6.559169 | 1.822973  | -0.849264 |
| 45 | 6 | 0 | -3.147073 | -1.808146 | 2.286961  |
| 46 | 1 | 0 | -3.013449 | -2.891578 | 2.199430  |
| 47 | 1 | 0 | -2.165120 | -1.378269 | 2.519777  |
| 48 | 1 | 0 | -3.808897 | -1.616594 | 3.134720  |
| 49 | 6 | 0 | 0.650316  | 2.188772  | 0.241140  |
| 50 | 7 | 0 | 0.552504  | 2.560214  | 1.948910  |
| 51 | 7 | 0 | 0.637110  | 2.586337  | 3.047233  |
| 52 | 6 | 0 | 2.075382  | 2.445267  | -0.071811 |
| 53 | 6 | 0 | 2.511190  | 3.722366  | -0.459401 |
| 54 | 6 | 0 | 3.008762  | 1.400200  | 0.017935  |
| 55 | 6 | 0 | 3.846839  | 3.944182  | -0.760535 |
| 56 | 1 | 0 | 1.799955  | 4.537402  | -0.547658 |
| 57 | 6 | 0 | 4.345714  | 1.628545  | -0.277230 |
| 58 | 1 | 0 | 2.689583  | 0.404039  | 0.314185  |
| 59 | 6 | 0 | 4.764917  | 2.898642  | -0.666664 |
| 60 | 1 | 0 | 4.174415  | 4.931259  | -1.069304 |
| 61 | 1 | 0 | 5.057579  | 0.812613  | -0.209615 |
| 62 | 1 | 0 | 5.810048  | 3.075962  | -0.900379 |
| 63 | 6 | 0 | -0.382716 | 3.122836  | -0.337519 |
| 64 | 8 | 0 | -0.398653 | 3.344464  | -1.522507 |
| 65 | 8 | 0 | -1.279939 | 3.552066  | 0.546399  |
| 66 | 6 | 0 | -2.389957 | 4.281547  | -0.002432 |
| 67 | 1 | 0 | -2.969866 | 4.611375  | 0.857269  |
| 68 | 1 | 0 | -2.033398 | 5.134499  | -0.582063 |
| 69 | 1 | 0 | -2.983478 | 3.622851  | -0.639964 |

-----  
Zero-point correction= 0.566022 (Hartree/Particle)  
Thermal correction to Energy= 0.604235  
Thermal correction to Enthalpy= 0.605179  
Thermal correction to Gibbs Free Energy= 0.491238  
Sum of electronic and zero-point Energies= -1666.141860  
Sum of electronic and thermal Energies= -1666.103647  
Sum of electronic and thermal Enthalpies= -1666.102703  
Sum of electronic and thermal Free Energies= -1666.216644  
ωB97XD /6-311++G(d,p)-SDD/SMD//ωB97XD /6-31G(d)-LANL2DZ energy in chloroform solvent = -1667.5073356

### INT3b

-----

| Center<br>Number | Atomic<br>Number | Atomic<br>Type | Coordinates (Angstroms) |           |           |
|------------------|------------------|----------------|-------------------------|-----------|-----------|
|                  |                  |                | X                       | Y         | Z         |
| 1                | 6                | 0              | 0.699501                | -3.810103 | -0.003465 |
| 2                | 6                | 0              | 2.000224                | -3.427249 | 0.034485  |
| 3                | 6                | 0              | 0.751659                | -1.563270 | 0.007516  |
| 4                | 7                | 0              | -0.050457               | -2.649353 | -0.019108 |
| 5                | 1                | 0              | 0.241117                | -4.786058 | -0.021613 |
| 6                | 1                | 0              | 2.914164                | -3.999300 | 0.057478  |
| 7                | 7                | 0              | 2.007856                | -2.044746 | 0.040139  |
| 8                | 79               | 0              | 0.047658                | 0.356773  | 0.023709  |
| 9                | 6                | 0              | -1.484699               | -2.556892 | -0.067894 |
| 10               | 6                | 0              | -2.102989               | -2.452909 | -1.317951 |
| 11               | 6                | 0              | -2.192806               | -2.505193 | 1.135982  |
| 12               | 6                | 0              | -3.489070               | -2.310845 | -1.339602 |
| 13               | 6                | 0              | -3.578367               | -2.364029 | 1.060994  |
| 14               | 6                | 0              | -4.242074               | -2.274453 | -0.163778 |
| 15               | 1                | 0              | -3.993671               | -2.230085 | -2.299221 |
| 16               | 1                | 0              | -4.151972               | -2.326726 | 1.983866  |
| 17               | 6                | 0              | 3.178733                | -1.209685 | 0.064233  |
| 18               | 6                | 0              | 3.748895                | -0.832560 | -1.153351 |

|    |   |   |           |           |           |
|----|---|---|-----------|-----------|-----------|
| 19 | 6 | 0 | 3.667311  | -0.779152 | 1.300845  |
| 20 | 6 | 0 | 4.870877  | -0.007203 | -1.107200 |
| 21 | 6 | 0 | 4.789127  | 0.045803  | 1.292979  |
| 22 | 6 | 0 | 5.406265  | 0.436543  | 0.102568  |
| 23 | 1 | 0 | 5.337167  | 0.298188  | -2.040550 |
| 24 | 1 | 0 | 5.191513  | 0.395816  | 2.240477  |
| 25 | 6 | 0 | -1.478224 | -2.557566 | 2.461019  |
| 26 | 1 | 0 | -0.817844 | -3.427980 | 2.532242  |
| 27 | 1 | 0 | -0.855643 | -1.665833 | 2.603367  |
| 28 | 1 | 0 | -2.192333 | -2.605282 | 3.286159  |
| 29 | 6 | 0 | -5.744967 | -2.167728 | -0.221427 |
| 30 | 1 | 0 | -6.196249 | -3.158664 | -0.346250 |
| 31 | 1 | 0 | -6.154373 | -1.738040 | 0.698063  |
| 32 | 1 | 0 | -6.071167 | -1.555259 | -1.068192 |
| 33 | 6 | 0 | -1.293510 | -2.451529 | -2.588527 |
| 34 | 1 | 0 | -1.944540 | -2.496757 | -3.464596 |
| 35 | 1 | 0 | -0.689478 | -1.539029 | -2.663607 |
| 36 | 1 | 0 | -0.603948 | -3.300747 | -2.632787 |
| 37 | 6 | 0 | 2.982473  | -1.164572 | 2.586499  |
| 38 | 1 | 0 | 1.997544  | -0.687902 | 2.662883  |
| 39 | 1 | 0 | 2.827531  | -2.246396 | 2.659128  |
| 40 | 1 | 0 | 3.572834  | -0.849659 | 3.450071  |
| 41 | 6 | 0 | 6.638829  | 1.303329  | 0.130249  |
| 42 | 1 | 0 | 7.528487  | 0.701484  | 0.348942  |
| 43 | 1 | 0 | 6.802293  | 1.798334  | -0.831012 |
| 44 | 1 | 0 | 6.566631  | 2.072954  | 0.904751  |
| 45 | 6 | 0 | 3.150395  | -1.274490 | -2.463811 |
| 46 | 1 | 0 | 3.034686  | -2.362456 | -2.515649 |
| 47 | 1 | 0 | 2.155635  | -0.834629 | -2.606251 |
| 48 | 1 | 0 | 3.778101  | -0.962743 | -3.301850 |
| 49 | 6 | 0 | -0.821490 | 2.181183  | 0.062905  |
| 50 | 6 | 0 | -2.213724 | 2.414023  | 0.120569  |
| 51 | 6 | 0 | -2.749648 | 3.730352  | 0.201113  |
| 52 | 6 | 0 | -3.115098 | 1.312277  | 0.093361  |
| 53 | 6 | 0 | -4.113916 | 3.928747  | 0.252060  |
| 54 | 1 | 0 | -2.077401 | 4.581472  | 0.241376  |
| 55 | 6 | 0 | -4.478944 | 1.520481  | 0.136952  |
| 56 | 1 | 0 | -2.720961 | 0.301909  | 0.032665  |
| 57 | 6 | 0 | -4.974259 | 2.824878  | 0.218605  |
| 58 | 1 | 0 | -4.520805 | 4.931435  | 0.321447  |
| 59 | 1 | 0 | -5.159904 | 0.676862  | 0.114014  |
| 60 | 1 | 0 | -6.047316 | 2.987137  | 0.260277  |
| 61 | 6 | 0 | 0.088962  | 3.355250  | 0.129988  |
| 62 | 8 | 0 | 0.405442  | 3.817415  | 1.201214  |
| 63 | 8 | 0 | 0.512185  | 3.751331  | -1.059927 |
| 64 | 6 | 0 | 1.482678  | 4.814354  | -1.057015 |
| 65 | 1 | 0 | 1.702915  | 5.002548  | -2.105585 |
| 66 | 1 | 0 | 1.066780  | 5.705050  | -0.582482 |
| 67 | 1 | 0 | 2.379554  | 4.497259  | -0.521463 |

-----  
Zero-point correction= 0.558209 (Hartree/Particle)  
Thermal correction to Energy= 0.594527  
Thermal correction to Enthalpy= 0.595472  
Thermal correction to Gibbs Free Energy= 0.484348  
Sum of electronic and zero-point Energies= -1556.692195  
Sum of electronic and thermal Energies= -1556.655877  
Sum of electronic and thermal Enthalpies= -1556.654933  
Sum of electronic and thermal Free Energies= -1556.766057  
ωB97XD /6-311++G(d,p)-SDD/SMD//ωB97XD /6-31G(d)-LANL2DZ energy in chloroform solvent = -1558.0211242

#### TS1b'

-----

| Center<br>Number | Atomic<br>Number | Atomic<br>Type | Coordinates (Angstroms) |           |          |
|------------------|------------------|----------------|-------------------------|-----------|----------|
|                  |                  |                | X                       | Y         | Z        |
| 1                | 6                | 0              | 1.653012                | -3.404486 | 0.294717 |
| 2                | 6                | 0              | 2.838441                | -2.750276 | 0.241872 |

|    |    |   |           |           |           |
|----|----|---|-----------|-----------|-----------|
| 3  | 6  | 0 | 1.214269  | -1.210331 | 0.078831  |
| 4  | 7  | 0 | 0.666842  | -2.440010 | 0.192754  |
| 5  | 1  | 0 | 1.418927  | -4.452385 | 0.394936  |
| 6  | 1  | 0 | 3.854963  | -3.107699 | 0.285544  |
| 7  | 7  | 0 | 2.545562  | -1.403744 | 0.109409  |
| 8  | 79 | 0 | 0.124132  | 0.492865  | -0.098736 |
| 9  | 6  | 0 | -0.753641 | -2.660685 | 0.193304  |
| 10 | 6  | 0 | -1.400319 | -2.842110 | -1.032332 |
| 11 | 6  | 0 | -1.436591 | -2.617336 | 1.412329  |
| 12 | 6  | 0 | -2.787392 | -2.982142 | -1.013687 |
| 13 | 6  | 0 | -2.823056 | -2.761045 | 1.377696  |
| 14 | 6  | 0 | -3.515089 | -2.933336 | 0.176582  |
| 15 | 1  | 0 | -3.312917 | -3.126311 | -1.954644 |
| 16 | 1  | 0 | -3.377944 | -2.730098 | 2.312258  |
| 17 | 6  | 0 | 3.512399  | -0.343861 | 0.015555  |
| 18 | 6  | 0 | 3.936578  | 0.061059  | -1.251841 |
| 19 | 6  | 0 | 3.964263  | 0.250882  | 1.196450  |
| 20 | 6  | 0 | 4.869123  | 1.094421  | -1.315073 |
| 21 | 6  | 0 | 4.896758  | 1.278581  | 1.079861  |
| 22 | 6  | 0 | 5.364562  | 1.708228  | -0.163775 |
| 23 | 1  | 0 | 5.219103  | 1.428079  | -2.288846 |
| 24 | 1  | 0 | 5.268916  | 1.756305  | 1.982837  |
| 25 | 6  | 0 | -0.700988 | -2.389354 | 2.707070  |
| 26 | 1  | 0 | 0.077194  | -3.143215 | 2.867385  |
| 27 | 1  | 0 | -0.208644 | -1.409621 | 2.710653  |
| 28 | 1  | 0 | -1.387658 | -2.426806 | 3.555825  |
| 29 | 6  | 0 | -5.020147 | -3.002705 | 0.162704  |
| 30 | 1  | 0 | -5.442642 | -1.991476 | 0.112842  |
| 31 | 1  | 0 | -5.388295 | -3.561128 | -0.702480 |
| 32 | 1  | 0 | -5.408460 | -3.478238 | 1.067740  |
| 33 | 6  | 0 | -0.625323 | -2.850003 | -2.324255 |
| 34 | 1  | 0 | -1.282515 | -3.061624 | -3.170913 |
| 35 | 1  | 0 | -0.146105 | -1.879211 | -2.498887 |
| 36 | 1  | 0 | 0.167727  | -3.605023 | -2.315616 |
| 37 | 6  | 0 | 3.440603  | -0.192736 | 2.537901  |
| 38 | 1  | 0 | 2.363342  | -0.004925 | 2.620769  |
| 39 | 1  | 0 | 3.596300  | -1.264851 | 2.700403  |
| 40 | 1  | 0 | 3.939320  | 0.345306  | 3.347447  |
| 41 | 6  | 0 | 6.405037  | 2.794197  | -0.258732 |
| 42 | 1  | 0 | 6.368019  | 3.300298  | -1.227393 |
| 43 | 1  | 0 | 6.272453  | 3.545184  | 0.525813  |
| 44 | 1  | 0 | 7.410154  | 2.372093  | -0.143324 |
| 45 | 6  | 0 | 3.385472  | -0.580485 | -2.498861 |
| 46 | 1  | 0 | 3.520111  | -1.667704 | -2.489146 |
| 47 | 1  | 0 | 2.310539  | -0.386972 | -2.597624 |
| 48 | 1  | 0 | 3.880921  | -0.187207 | -3.389453 |
| 49 | 6  | 0 | -2.315071 | 1.694397  | -0.312568 |
| 50 | 6  | 0 | -1.141441 | 2.173598  | -0.271736 |
| 51 | 1  | 0 | -0.763796 | 3.187051  | -0.305556 |
| 52 | 6  | 0 | -3.255564 | 0.518714  | -0.275748 |
| 53 | 1  | 0 | -3.154132 | -0.025135 | -1.227392 |
| 54 | 1  | 0 | -2.947810 | -0.146267 | 0.535073  |
| 55 | 8  | 0 | -4.581655 | 0.883533  | -0.039447 |
| 56 | 6  | 0 | -4.998586 | 1.827145  | -1.009037 |
| 57 | 1  | 0 | -6.036254 | 2.073214  | -0.769633 |
| 58 | 1  | 0 | -4.970595 | 1.385895  | -2.015110 |
| 59 | 6  | 0 | -4.106988 | 3.041730  | -0.941985 |
| 60 | 6  | 0 | -3.781357 | 3.626714  | 0.239142  |
| 61 | 1  | 0 | -3.785318 | 3.500895  | -1.874559 |
| 62 | 1  | 0 | -4.147495 | 3.186199  | 1.166013  |
| 63 | 6  | 0 | -2.954365 | 4.816223  | 0.338393  |
| 64 | 6  | 0 | -2.550234 | 5.319447  | 1.510671  |
| 65 | 1  | 0 | -2.665012 | 5.299022  | -0.593376 |
| 66 | 1  | 0 | -1.938481 | 6.214055  | 1.564156  |
| 67 | 1  | 0 | -2.830134 | 4.857326  | 2.454124  |

Zero-point correction=

0.566800 (Hartree/Particle)

Thermal correction to Energy= 0.601987  
 Thermal correction to Enthalpy= 0.602931  
 Thermal correction to Gibbs Free Energy= 0.495835  
 Sum of electronic and zero-point Energies= -1444.494172  
 Sum of electronic and thermal Energies= -1444.458985  
 Sum of electronic and thermal Enthalpies= -1444.458041  
 Sum of electronic and thermal Free Energies= -1444.565136  
 ωB97XD /6-311++G(d,p)-SDD/SMD//ωB97XD /6-31G(d)-LANL2DZ energy in chloroform solvent = -1445.8009841

**INT2b'**

| Center<br>Number | Atomic<br>Number | Atomic<br>Type | Coordinates (Angstroms) |           |           |
|------------------|------------------|----------------|-------------------------|-----------|-----------|
|                  |                  |                | X                       | Y         | Z         |
| 1                | 6                | 0              | 1.519143                | -3.401054 | 0.537506  |
| 2                | 6                | 0              | 2.726908                | -2.786921 | 0.485555  |
| 3                | 6                | 0              | 1.159070                | -1.215960 | 0.143451  |
| 4                | 7                | 0              | 0.570639                | -2.419005 | 0.325236  |
| 5                | 1                | 0              | 1.248748                | -4.431841 | 0.703000  |
| 6                | 1                | 0              | 3.728531                | -3.170700 | 0.597539  |
| 7                | 7                | 0              | 2.482010                | -1.447831 | 0.242542  |
| 8                | 79               | 0              | 0.100182                | 0.513377  | -0.184399 |
| 9                | 6                | 0              | -0.855583               | -2.597443 | 0.282827  |
| 10               | 6                | 0              | -1.461129               | -2.831216 | -0.954821 |
| 11               | 6                | 0              | -1.582684               | -2.458684 | 1.468434  |
| 12               | 6                | 0              | -2.851900               | -2.922363 | -0.983653 |
| 13               | 6                | 0              | -2.970244               | -2.560306 | 1.387296  |
| 14               | 6                | 0              | -3.622036               | -2.778096 | 0.171932  |
| 15               | 1                | 0              | -3.347042               | -3.101148 | -1.934961 |
| 16               | 1                | 0              | -3.558580               | -2.455892 | 2.295835  |
| 17               | 6                | 0              | 3.486069                | -0.429479 | 0.094973  |
| 18               | 6                | 0              | 4.016353                | -0.199791 | -1.177054 |
| 19               | 6                | 0              | 3.866416                | 0.302531  | 1.221802  |
| 20               | 6                | 0              | 4.982696                | 0.795680  | -1.298278 |
| 21               | 6                | 0              | 4.835189                | 1.289107  | 1.048045  |
| 22               | 6                | 0              | 5.407929                | 1.544062  | -0.198824 |
| 23               | 1                | 0              | 5.415333                | 0.992533  | -2.276087 |
| 24               | 1                | 0              | 5.151444                | 1.872580  | 1.909208  |
| 25               | 6                | 0              | -0.889301               | -2.170351 | 2.774439  |
| 26               | 1                | 0              | -0.136613               | -2.929728 | 3.011067  |
| 27               | 1                | 0              | -0.372590               | -1.203610 | 2.737197  |
| 28               | 1                | 0              | -1.607489               | -2.140112 | 3.597076  |
| 29               | 6                | 0              | -5.126869               | -2.795786 | 0.100902  |
| 30               | 1                | 0              | -5.508227               | -1.776103 | -0.033877 |
| 31               | 1                | 0              | -5.481736               | -3.398412 | -0.739910 |
| 32               | 1                | 0              | -5.566986               | -3.196497 | 1.018500  |
| 33               | 6                | 0              | -0.640190               | -2.936812 | -2.213710 |
| 34               | 1                | 0              | -1.267728               | -3.207938 | -3.065931 |
| 35               | 1                | 0              | -0.151565               | -1.981808 | -2.441875 |
| 36               | 1                | 0              | 0.149319                | -3.690086 | -2.121588 |
| 37               | 6                | 0              | 3.232223                | 0.048609  | 2.564891  |
| 38               | 1                | 0              | 2.163036                | 0.292246  | 2.546083  |
| 39               | 1                | 0              | 3.320201                | -1.002172 | 2.861999  |
| 40               | 1                | 0              | 3.703625                | 0.658524  | 3.338975  |
| 41               | 6                | 0              | 6.482639                | 2.589107  | -0.354470 |
| 42               | 1                | 0              | 6.431458                | 3.070976  | -1.335158 |
| 43               | 1                | 0              | 6.401952                | 3.364046  | 0.413044  |
| 44               | 1                | 0              | 7.475783                | 2.134356  | -0.261700 |
| 45               | 6                | 0              | 3.538417                | -0.984985 | -2.371118 |
| 46               | 1                | 0              | 3.681547                | -2.062255 | -2.232693 |
| 47               | 1                | 0              | 2.468607                | -0.819261 | -2.545852 |
| 48               | 1                | 0              | 4.077717                | -0.687549 | -3.273375 |
| 49               | 6                | 0              | -2.489851               | 1.997732  | -0.359991 |
| 50               | 6                | 0              | -1.120039               | 2.089108  | -0.480223 |
| 51               | 1                | 0              | -0.743748               | 3.086806  | -0.715901 |
| 52               | 6                | 0              | -3.260360               | 0.720077  | -0.048023 |
| 53               | 1                | 0              | -2.908328               | -0.084351 | -0.709716 |

|    |   |   |           |          |           |
|----|---|---|-----------|----------|-----------|
| 54 | 1 | 0 | -3.156040 | 0.389532 | 0.987882  |
| 55 | 8 | 0 | -4.623539 | 1.021008 | -0.278604 |
| 56 | 6 | 0 | -4.681315 | 1.930568 | -1.354333 |
| 57 | 1 | 0 | -5.657638 | 2.419467 | -1.332201 |
| 58 | 1 | 0 | -4.545901 | 1.428768 | -2.322604 |
| 59 | 6 | 0 | -3.533375 | 2.909580 | -1.128552 |
| 60 | 6 | 0 | -3.289611 | 3.365900 | 0.213031  |
| 61 | 1 | 0 | -3.155600 | 3.486484 | -1.967444 |
| 62 | 1 | 0 | -3.957747 | 2.997130 | 0.989435  |
| 63 | 6 | 0 | -2.548891 | 4.599731 | 0.519584  |
| 64 | 6 | 0 | -2.564895 | 5.155478 | 1.731055  |
| 65 | 1 | 0 | -2.023401 | 5.086194 | -0.299790 |
| 66 | 1 | 0 | -2.056569 | 6.093560 | 1.926751  |
| 67 | 1 | 0 | -3.097045 | 4.701103 | 2.562976  |

-----  
Zero-point correction= 0.570260 (Hartree/Particle)  
Thermal correction to Energy= 0.604681  
Thermal correction to Enthalpy= 0.605625  
Thermal correction to Gibbs Free Energy= 0.500412  
Sum of electronic and zero-point Energies= -1444.526414  
Sum of electronic and thermal Energies= -1444.491993  
Sum of electronic and thermal Enthalpies= -1444.491048  
Sum of electronic and thermal Free Energies= -1444.596262  
ωB97XD /6-311++G(d,p)-SDD/SMD//ωB97XD /6-31G(d)-LANL2DZ energy in chloroform solvent = -1445.8343602

#### INT2b''

| Center Number | Atomic Number | Atomic Type | Coordinates (Angstroms) |           |           |
|---------------|---------------|-------------|-------------------------|-----------|-----------|
|               |               |             | X                       | Y         | Z         |
| 1             | 6             | 0           | 2.228310                | 2.402951  | 0.516175  |
| 2             | 6             | 0           | 1.969973                | 1.112106  | 0.290893  |
| 3             | 1             | 0           | 2.724501                | 0.333170  | 0.261237  |
| 4             | 6             | 0           | 3.519126                | 3.170354  | 0.576858  |
| 5             | 1             | 0           | 3.742738                | 3.522310  | 1.597457  |
| 6             | 1             | 0           | 4.381980                | 2.628398  | 0.186794  |
| 7             | 8             | 0           | 3.244206                | 4.260135  | -0.292484 |
| 8             | 6             | 0           | 1.903702                | 4.677869  | -0.067065 |
| 9             | 1             | 0           | 1.526571                | 5.099087  | -1.002757 |
| 10            | 1             | 0           | 1.871722                | 5.458737  | 0.704665  |
| 11            | 6             | 0           | 1.128191                | 3.422960  | 0.403523  |
| 12            | 6             | 0           | 0.103349                | 2.797354  | -0.535621 |
| 13            | 1             | 0           | 0.660310                | 3.600738  | 1.380102  |
| 14            | 1             | 0           | 0.374245                | 2.837874  | -1.593868 |
| 15            | 6             | 0           | -1.306963               | 2.697436  | -0.232000 |
| 16            | 6             | 0           | -2.147007               | 1.933098  | -1.006066 |
| 17            | 1             | 0           | -1.642268               | 3.005968  | 0.758186  |
| 18            | 1             | 0           | -3.148886               | 1.692348  | -0.668051 |
| 19            | 1             | 0           | -1.897436               | 1.688639  | -2.037084 |
| 20            | 6             | 0           | -0.207169               | -3.560564 | 0.307210  |
| 21            | 6             | 0           | -1.529469               | -3.276545 | 0.365449  |
| 22            | 6             | 0           | -0.428855               | -1.336710 | 0.070378  |
| 23            | 7             | 0           | 0.449358                | -2.358228 | 0.126581  |
| 24            | 1             | 0           | 0.328774                | -4.493839 | 0.375946  |
| 25            | 1             | 0           | -2.393430               | -3.908107 | 0.498442  |
| 26            | 7             | 0           | -1.645662               | -1.906508 | 0.217466  |
| 27            | 79            | 0           | -0.007254               | 0.696547  | -0.151821 |
| 28            | 6             | 0           | 1.876984                | -2.221938 | 0.029573  |
| 29            | 6             | 0           | 2.615959                | -2.165444 | 1.213824  |
| 30            | 6             | 0           | 2.455776                | -2.112328 | -1.236568 |
| 31            | 6             | 0           | 3.995732                | -2.006812 | 1.100828  |
| 32            | 6             | 0           | 3.838013                | -1.947034 | -1.295955 |
| 33            | 6             | 0           | 4.623334                | -1.898513 | -0.142083 |
| 34            | 1             | 0           | 4.594547                | -1.957330 | 2.006743  |
| 35            | 1             | 0           | 4.314942                | -1.854200 | -2.268402 |
| 36            | 6             | 0           | -2.895063               | -1.198545 | 0.200776  |
| 37            | 6             | 0           | -3.327535               | -0.566512 | 1.368562  |

|    |   |   |           |           |           |
|----|---|---|-----------|-----------|-----------|
| 38 | 6 | 0 | -3.615254 | -1.159241 | -0.997424 |
| 39 | 6 | 0 | -4.542293 | 0.117078  | 1.315316  |
| 40 | 6 | 0 | -4.826289 | -0.471388 | -0.997190 |
| 41 | 6 | 0 | -5.309253 | 0.165884  | 0.149423  |
| 42 | 1 | 0 | -4.905585 | 0.613048  | 2.211971  |
| 43 | 1 | 0 | -5.407223 | -0.427935 | -1.915201 |
| 44 | 6 | 0 | 1.615595  | -2.126035 | -2.487446 |
| 45 | 1 | 0 | 0.857801  | -2.915776 | -2.462751 |
| 46 | 1 | 0 | 1.090204  | -1.171069 | -2.614042 |
| 47 | 1 | 0 | 2.238166  | -2.280793 | -3.371650 |
| 48 | 6 | 0 | 6.119959  | -1.755138 | -0.240061 |
| 49 | 1 | 0 | 6.406843  | -1.138692 | -1.097045 |
| 50 | 1 | 0 | 6.539924  | -1.304453 | 0.663484  |
| 51 | 1 | 0 | 6.590755  | -2.736615 | -0.368830 |
| 52 | 6 | 0 | 1.936603  | -2.219584 | 2.557200  |
| 53 | 1 | 0 | 2.664215  | -2.106643 | 3.363924  |
| 54 | 1 | 0 | 1.196391  | -1.416043 | 2.652471  |
| 55 | 1 | 0 | 1.411065  | -3.168523 | 2.710529  |
| 56 | 6 | 0 | -3.074710 | -1.803592 | -2.247659 |
| 57 | 1 | 0 | -2.079316 | -1.412706 | -2.491263 |
| 58 | 1 | 0 | -2.974562 | -2.888529 | -2.135367 |
| 59 | 1 | 0 | -3.732623 | -1.614707 | -3.098845 |
| 60 | 6 | 0 | -6.641231 | 0.870255  | 0.129627  |
| 61 | 1 | 0 | -6.701897 | 1.637457  | 0.906338  |
| 62 | 1 | 0 | -6.827976 | 1.344731  | -0.838209 |
| 63 | 1 | 0 | -7.452541 | 0.154966  | 0.306713  |
| 64 | 6 | 0 | -2.499792 | -0.591233 | 2.628003  |
| 65 | 1 | 0 | -2.096185 | -1.588074 | 2.831355  |
| 66 | 1 | 0 | -1.645254 | 0.093233  | 2.551055  |
| 67 | 1 | 0 | -3.095324 | -0.282963 | 3.490527  |

-----  
Zero-point correction= 0.571187 (Hartree/Particle)

Thermal correction to Energy= 0.604922

Thermal correction to Enthalpy= 0.605866

Thermal correction to Gibbs Free Energy= 0.504479

Sum of electronic and zero-point Energies= -1444.505321

Sum of electronic and thermal Energies= -1444.471585

Sum of electronic and thermal Enthalpies= -1444.470641

Sum of electronic and thermal Free Energies= -1444.572029

$\omega$ B97XD /6-311++G(d,p)-SDD/SMD// $\omega$ B97XD /6-31G(d)-LANL2DZ energy in chloroform solvent = -1445.8261238

## TS2b

| Center Number | Atomic Number | Atomic Type | Coordinates (Angstroms) |           |           |
|---------------|---------------|-------------|-------------------------|-----------|-----------|
|               |               |             | X                       | Y         | Z         |
| 1             | 6             | 0           | 2.987412                | -1.790038 | -2.620238 |
| 2             | 6             | 0           | 1.854744                | -2.459053 | -2.947811 |
| 3             | 6             | 0           | 1.421142                | -1.245783 | -1.106043 |
| 4             | 7             | 0           | 2.697210                | -1.050072 | -1.486699 |
| 5             | 1             | 0           | 3.962793                | -1.768533 | -3.079576 |
| 6             | 1             | 0           | 1.636280                | -3.144872 | -3.750831 |
| 7             | 7             | 0           | 0.904494                | -2.108647 | -2.005112 |
| 8             | 79            | 0           | 0.380181                | -0.454556 | 0.455003  |
| 9             | 6             | 0           | 3.563701                | -0.108281 | -0.834076 |
| 10            | 6             | 0           | 4.287003                | -0.519232 | 0.287093  |
| 11            | 6             | 0           | 3.594585                | 1.202087  | -1.320875 |
| 12            | 6             | 0           | 5.080526                | 0.433420  | 0.923342  |
| 13            | 6             | 0           | 4.401882                | 2.117476  | -0.648457 |
| 14            | 6             | 0           | 5.149601                | 1.752594  | 0.473051  |
| 15            | 1             | 0           | 5.658554                | 0.137814  | 1.795536  |
| 16            | 1             | 0           | 4.453653                | 3.140684  | -1.013210 |
| 17            | 6             | 0           | -0.484495               | -2.479586 | -1.991206 |
| 18            | 6             | 0           | -0.894431               | -3.540187 | -1.178073 |
| 19            | 6             | 0           | -1.379110               | -1.692942 | -2.720942 |
| 20            | 6             | 0           | -2.258882               | -3.810762 | -1.117042 |
| 21            | 6             | 0           | -2.735153               | -2.008320 | -2.631447 |

|    |   |   |           |           |           |
|----|---|---|-----------|-----------|-----------|
| 22 | 6 | 0 | -3.191196 | -3.059837 | -1.836172 |
| 23 | 1 | 0 | -2.604843 | -4.627614 | -0.488304 |
| 24 | 1 | 0 | -3.450252 | -1.416482 | -3.198311 |
| 25 | 6 | 0 | 2.767799  | 1.610174  | -2.514153 |
| 26 | 1 | 0 | 3.024436  | 1.026068  | -3.404851 |
| 27 | 1 | 0 | 1.696979  | 1.463686  | -2.327598 |
| 28 | 1 | 0 | 2.928034  | 2.665220  | -2.750401 |
| 29 | 6 | 0 | 5.993930  | 2.768135  | 1.199225  |
| 30 | 1 | 0 | 6.312366  | 3.573773  | 0.531677  |
| 31 | 1 | 0 | 5.429794  | 3.221877  | 2.022475  |
| 32 | 1 | 0 | 6.888384  | 2.308146  | 1.629067  |
| 33 | 6 | 0 | 4.181489  | -1.929390 | 0.806796  |
| 34 | 1 | 0 | 4.929966  | -2.114713 | 1.580952  |
| 35 | 1 | 0 | 3.190841  | -2.108066 | 1.242862  |
| 36 | 1 | 0 | 4.324059  | -2.669113 | 0.012068  |
| 37 | 6 | 0 | -0.895637 | -0.518554 | -3.531296 |
| 38 | 1 | 0 | -0.435029 | 0.234925  | -2.880684 |
| 39 | 1 | 0 | -0.144848 | -0.814592 | -4.271501 |
| 40 | 1 | 0 | -1.725253 | -0.050144 | -4.067512 |
| 41 | 6 | 0 | -4.658553 | -3.393837 | -1.751564 |
| 42 | 1 | 0 | -5.272607 | -2.644291 | -2.259505 |
| 43 | 1 | 0 | -4.864011 | -4.362863 | -2.219341 |
| 44 | 1 | 0 | -4.986926 | -3.458872 | -0.708572 |
| 45 | 6 | 0 | 0.100107  | -4.325505 | -0.364164 |
| 46 | 1 | 0 | 0.957166  | -4.643746 | -0.966550 |
| 47 | 1 | 0 | 0.489606  | -3.717420 | 0.461451  |
| 48 | 1 | 0 | -0.365180 | -5.216300 | 0.064185  |
| 49 | 6 | 0 | -0.824667 | 0.184226  | 2.010289  |
| 50 | 6 | 0 | -0.483871 | 2.545836  | 1.155776  |
| 51 | 6 | 0 | -0.992943 | 2.361526  | 2.247812  |
| 52 | 1 | 0 | -1.432291 | 2.481642  | 3.213895  |
| 53 | 6 | 0 | 0.097613  | 2.786852  | -0.172804 |
| 54 | 1 | 0 | 0.031128  | 3.872238  | -0.348879 |
| 55 | 1 | 0 | 1.154546  | 2.503755  | -0.174240 |
| 56 | 8 | 0 | -0.527910 | 2.060658  | -1.197714 |
| 57 | 6 | 0 | -1.893915 | 2.423151  | -1.429154 |
| 58 | 1 | 0 | -2.470746 | 2.314417  | -0.500139 |
| 59 | 1 | 0 | -2.250100 | 1.669594  | -2.137735 |
| 60 | 6 | 0 | -2.026574 | 3.804802  | -1.986285 |
| 61 | 6 | 0 | -2.667898 | 4.798820  | -1.358839 |
| 62 | 1 | 0 | -1.559073 | 3.980932  | -2.954420 |
| 63 | 1 | 0 | -3.128138 | 4.606171  | -0.387892 |
| 64 | 6 | 0 | -2.817596 | 6.148882  | -1.892532 |
| 65 | 6 | 0 | -3.471553 | 7.123648  | -1.255543 |
| 66 | 1 | 0 | -2.364639 | 6.343806  | -2.863310 |
| 67 | 1 | 0 | -3.567602 | 8.116671  | -1.681964 |
| 68 | 1 | 0 | -3.937932 | 6.958936  | -0.286964 |
| 69 | 6 | 0 | -0.165520 | 0.033350  | 3.364771  |
| 70 | 8 | 0 | 0.290763  | 0.891482  | 4.080603  |
| 71 | 8 | 0 | -0.130791 | -1.274601 | 3.638273  |
| 72 | 6 | 0 | 0.544426  | -1.635700 | 4.851174  |
| 73 | 1 | 0 | 0.090877  | -1.130644 | 5.706233  |
| 74 | 1 | 0 | 0.427606  | -2.714552 | 4.934584  |
| 75 | 1 | 0 | 1.600417  | -1.364540 | 4.786599  |
| 76 | 6 | 0 | -2.267735 | -0.051487 | 1.941607  |
| 77 | 6 | 0 | -3.066055 | -0.046548 | 3.102278  |
| 78 | 6 | 0 | -2.880408 | -0.324563 | 0.704285  |
| 79 | 6 | 0 | -4.422779 | -0.318837 | 3.029391  |
| 80 | 1 | 0 | -2.613596 | 0.165245  | 4.067904  |
| 81 | 6 | 0 | -4.240850 | -0.583445 | 0.631050  |
| 82 | 1 | 0 | -2.279818 | -0.340201 | -0.200934 |
| 83 | 6 | 0 | -5.012517 | -0.582263 | 1.791852  |
| 84 | 1 | 0 | -5.024882 | -0.322656 | 3.932009  |
| 85 | 1 | 0 | -4.697003 | -0.792783 | -0.330969 |
| 86 | 1 | 0 | -6.077172 | -0.786948 | 1.734372  |

Zero-point correction=

0.718486 (Hartree/Particle)



Thermal correction to Energy= 0.765305  
 Thermal correction to Enthalpy= 0.766249  
 Thermal correction to Gibbs Free Energy= 0.629711  
 Sum of electronic and zero-point Energies= -1942.364810  
 Sum of electronic and thermal Energies= -1942.317992  
 Sum of electronic and thermal Enthalpies= -1942.317047  
 Sum of electronic and thermal Free Energies= -1942.453586  
 ωB97XD /6-311++G(d,p)-SDD/SMD//ωB97XD /6-31G(d)-LANL2DZ energy in chloroform solvent = -1943.9642749

#### INT4b

| Center<br>Number | Atomic<br>Number | Atomic<br>Type | Coordinates (Angstroms) |           |           |
|------------------|------------------|----------------|-------------------------|-----------|-----------|
|                  |                  |                | X                       | Y         | Z         |
| 1                | 6                | 0              | 2.187231                | -3.073652 | 1.767338  |
| 2                | 6                | 0              | 0.890694                | -3.328920 | 2.084688  |
| 3                | 6                | 0              | 0.932815                | -1.467019 | 0.835426  |
| 4                | 7                | 0              | 2.187201                | -1.925641 | 1.001055  |
| 5                | 1                | 0              | 3.098256                | -3.597388 | 2.010026  |
| 6                | 1                | 0              | 0.441167                | -4.120816 | 2.662465  |
| 7                | 7                | 0              | 0.139229                | -2.330267 | 1.501653  |
| 8                | 79               | 0              | 0.356726                | 0.212091  | -0.261614 |
| 9                | 6                | 0              | 3.327426                | -1.274918 | 0.413512  |
| 10               | 6                | 0              | 4.024722                | -0.338987 | 1.180749  |
| 11               | 6                | 0              | 3.638102                | -1.553255 | -0.920908 |
| 12               | 6                | 0              | 5.090354                | 0.322125  | 0.573628  |
| 13               | 6                | 0              | 4.710583                | -0.862552 | -1.481470 |
| 14               | 6                | 0              | 5.445116                | 0.075858  | -0.753974 |
| 15               | 1                | 0              | 5.660866                | 1.044190  | 1.152999  |
| 16               | 1                | 0              | 4.980006                | -1.063600 | -2.515485 |
| 17               | 6                | 0              | -1.289833               | -2.175919 | 1.504644  |
| 18               | 6                | 0              | -1.853301               | -1.248260 | 2.384659  |
| 19               | 6                | 0              | -2.031951               | -2.867634 | 0.544551  |
| 20               | 6                | 0              | -3.212417               | -0.981057 | 2.245117  |
| 21               | 6                | 0              | -3.388773               | -2.564431 | 0.445671  |
| 22               | 6                | 0              | -3.989104               | -1.613974 | 1.273211  |
| 23               | 1                | 0              | -3.673066               | -0.249674 | 2.903163  |
| 24               | 1                | 0              | -3.987769               | -3.070565 | -0.307404 |
| 25               | 6                | 0              | 2.826100                | -2.527225 | -1.736042 |
| 26               | 1                | 0              | 2.572755                | -3.427223 | -1.165949 |
| 27               | 1                | 0              | 1.885902                | -2.073355 | -2.076217 |
| 28               | 1                | 0              | 3.379458                | -2.838080 | -2.625662 |
| 29               | 6                | 0              | 6.585282                | 0.819169  | -1.401395 |
| 30               | 1                | 0              | 7.177725                | 0.157817  | -2.040638 |
| 31               | 1                | 0              | 6.208413                | 1.632668  | -2.032110 |
| 32               | 1                | 0              | 7.253708                | 1.257772  | -0.655420 |
| 33               | 6                | 0              | 3.613651                | -0.039035 | 2.598904  |
| 34               | 1                | 0              | 4.308903                | 0.664987  | 3.063241  |
| 35               | 1                | 0              | 2.609029                | 0.400944  | 2.626455  |
| 36               | 1                | 0              | 3.591008                | -0.941029 | 3.219620  |
| 37               | 6                | 0              | -1.386200               | -3.894666 | -0.349551 |
| 38               | 1                | 0              | -0.462179               | -3.517730 | -0.801862 |
| 39               | 1                | 0              | -1.128975               | -4.800315 | 0.211534  |
| 40               | 1                | 0              | -2.064515               | -4.187724 | -1.154422 |
| 41               | 6                | 0              | -5.454944               | -1.293701 | 1.137801  |
| 42               | 1                | 0              | -5.804784               | -1.450485 | 0.112940  |
| 43               | 1                | 0              | -6.056437               | -1.933297 | 1.793903  |
| 44               | 1                | 0              | -5.657877               | -0.254643 | 1.416559  |
| 45               | 6                | 0              | -1.017657               | -0.568656 | 3.437957  |
| 46               | 1                | 0              | -0.507248               | -1.301425 | 4.072497  |
| 47               | 1                | 0              | -0.247372               | 0.069381  | 2.991231  |
| 48               | 1                | 0              | -1.640964               | 0.060117  | 4.077209  |
| 49               | 6                | 0              | -0.239129               | 2.335933  | -0.386586 |
| 50               | 6                | 0              | -0.139611               | 1.126289  | -2.085707 |
| 51               | 6                | 0              | -0.503462               | 2.366002  | -1.849986 |
| 52               | 1                | 0              | -0.829476               | 3.192427  | -2.472256 |
| 53               | 6                | 0              | 0.079869                | 0.335093  | -3.351323 |

|    |   |   |           |           |           |
|----|---|---|-----------|-----------|-----------|
| 54 | 1 | 0 | -0.585154 | 0.793502  | -4.100886 |
| 55 | 1 | 0 | 1.114583  | 0.478478  | -3.675609 |
| 56 | 8 | 0 | -0.098862 | -1.049812 | -3.284406 |
| 57 | 6 | 0 | -1.357729 | -1.506043 | -2.800711 |
| 58 | 1 | 0 | -1.373610 | -1.457477 | -1.701559 |
| 59 | 1 | 0 | -1.385400 | -2.561765 | -3.088061 |
| 60 | 6 | 0 | -2.554885 | -0.776322 | -3.326728 |
| 61 | 6 | 0 | -3.460106 | -0.229510 | -2.506553 |
| 62 | 1 | 0 | -2.689022 | -0.736838 | -4.407381 |
| 63 | 1 | 0 | -3.301030 | -0.298635 | -1.427998 |
| 64 | 6 | 0 | -4.675176 | 0.452130  | -2.939420 |
| 65 | 6 | 0 | -5.595099 | 0.915763  | -2.087953 |
| 66 | 1 | 0 | -4.819993 | 0.573159  | -4.011749 |
| 67 | 1 | 0 | -6.494502 | 1.416062  | -2.430980 |
| 68 | 1 | 0 | -5.478346 | 0.786831  | -1.014297 |
| 69 | 6 | 0 | 1.023852  | 3.111691  | -0.038591 |
| 70 | 8 | 0 | 1.379389  | 4.057893  | -0.691944 |
| 71 | 8 | 0 | 1.679575  | 2.636857  | 1.025938  |
| 72 | 6 | 0 | 2.902449  | 3.317258  | 1.346811  |
| 73 | 1 | 0 | 2.718170  | 4.383114  | 1.490232  |
| 74 | 1 | 0 | 3.255430  | 2.857681  | 2.268081  |
| 75 | 1 | 0 | 3.627390  | 3.171655  | 0.543297  |
| 76 | 6 | 0 | -1.393738 | 2.386776  | 0.554732  |
| 77 | 6 | 0 | -1.214964 | 2.568007  | 1.935193  |
| 78 | 6 | 0 | -2.699914 | 2.308563  | 0.044097  |
| 79 | 6 | 0 | -2.314480 | 2.692008  | 2.775705  |
| 80 | 1 | 0 | -0.214069 | 2.624430  | 2.346972  |
| 81 | 6 | 0 | -3.792638 | 2.432614  | 0.889816  |
| 82 | 1 | 0 | -2.859990 | 2.159949  | -1.018960 |
| 83 | 6 | 0 | -3.604889 | 2.627911  | 2.256967  |
| 84 | 1 | 0 | -2.160618 | 2.850284  | 3.838460  |
| 85 | 1 | 0 | -4.795151 | 2.399617  | 0.475817  |
| 86 | 1 | 0 | -4.461866 | 2.738964  | 2.914340  |

-----  
Zero-point correction= 0.722551 (Hartree/Particle)  
Thermal correction to Energy= 0.766318  
Thermal correction to Enthalpy= 0.767262  
Thermal correction to Gibbs Free Energy= 0.644558  
Sum of electronic and zero-point Energies= -1942.416505  
Sum of electronic and thermal Energies= -1942.372737  
Sum of electronic and thermal Enthalpies= -1942.371793  
Sum of electronic and thermal Free Energies= -1942.494497  
ωB97XD /6-311++G(d,p)-SDD/SMD//ωB97XD /6-31G(d)-LANL2DZ energy in chloroform solvent = -1944.0213212

### TS3b

-----

| Center<br>Number | Atomic<br>Number | Atomic<br>Type | Coordinates (Angstroms) |           |           |
|------------------|------------------|----------------|-------------------------|-----------|-----------|
|                  |                  |                | X                       | Y         | Z         |
| 1                | 6                | 0              | -1.883811               | -0.389351 | 3.539778  |
| 2                | 6                | 0              | -0.556557               | -0.506794 | 3.795218  |
| 3                | 6                | 0              | -0.792602               | -0.108364 | 1.599536  |
| 4                | 7                | 0              | -2.005424               | -0.145154 | 2.185053  |
| 5                | 1                | 0              | -2.744056               | -0.452922 | 4.187025  |
| 6                | 1                | 0              | -0.019897               | -0.698612 | 4.710647  |
| 7                | 7                | 0              | 0.093292                | -0.328308 | 2.589183  |
| 8                | 79               | 0              | -0.406785               | 0.383130  | -0.382791 |
| 9                | 6                | 0              | -3.237439               | -0.002207 | 1.456612  |
| 10               | 6                | 0              | -3.922760               | -1.170672 | 1.099225  |
| 11               | 6                | 0              | -3.676226               | 1.273463  | 1.095872  |
| 12               | 6                | 0              | -5.103959               | -1.026166 | 0.378081  |
| 13               | 6                | 0              | -4.863174               | 1.361192  | 0.365730  |
| 14               | 6                | 0              | -5.588914               | 0.229935  | 0.000733  |
| 15               | 1                | 0              | -5.663600               | -1.917714 | 0.103648  |
| 16               | 1                | 0              | -5.228135               | 2.344562  | 0.079419  |
| 17               | 6                | 0              | 1.508494                | -0.419784 | 2.361624  |
| 18               | 6                | 0              | 2.029707                | -1.664598 | 1.988344  |

|    |   |   |           |           |           |
|----|---|---|-----------|-----------|-----------|
| 19 | 6 | 0 | 2.290016  | 0.729865  | 2.477286  |
| 20 | 6 | 0 | 3.397679  | -1.739284 | 1.754098  |
| 21 | 6 | 0 | 3.656787  | 0.602996  | 2.220763  |
| 22 | 6 | 0 | 4.225595  | -0.619067 | 1.867186  |
| 23 | 1 | 0 | 3.831464  | -2.694521 | 1.471687  |
| 24 | 1 | 0 | 4.287355  | 1.485668  | 2.293933  |
| 25 | 6 | 0 | -2.898392 | 2.522497  | 1.427542  |
| 26 | 1 | 0 | -2.258911 | 2.396573  | 2.305687  |
| 27 | 1 | 0 | -2.261841 | 2.810561  | 0.580673  |
| 28 | 1 | 0 | -3.578045 | 3.357278  | 1.619264  |
| 29 | 6 | 0 | -6.858339 | 0.347269  | -0.802982 |
| 30 | 1 | 0 | -7.307218 | 1.338968  | -0.700671 |
| 31 | 1 | 0 | -6.658751 | 0.182394  | -1.868323 |
| 32 | 1 | 0 | -7.597408 | -0.395402 | -0.488240 |
| 33 | 6 | 0 | -3.378223 | -2.532267 | 1.445019  |
| 34 | 1 | 0 | -3.227302 | -2.655516 | 2.522603  |
| 35 | 1 | 0 | -4.064184 | -3.315473 | 1.113401  |
| 36 | 1 | 0 | -2.414349 | -2.698755 | 0.950761  |
| 37 | 6 | 0 | 1.695534  | 2.057503  | 2.871153  |
| 38 | 1 | 0 | 0.708128  | 2.211146  | 2.423959  |
| 39 | 1 | 0 | 1.573965  | 2.129515  | 3.958215  |
| 40 | 1 | 0 | 2.342481  | 2.878776  | 2.552114  |
| 41 | 6 | 0 | 5.704573  | -0.746667 | 1.608214  |
| 42 | 1 | 0 | 6.170954  | -1.418276 | 2.337048  |
| 43 | 1 | 0 | 5.890625  | -1.167387 | 0.613276  |
| 44 | 1 | 0 | 6.210889  | 0.220399  | 1.670720  |
| 45 | 6 | 0 | 1.132195  | -2.864549 | 1.835758  |
| 46 | 1 | 0 | 0.575963  | -3.070950 | 2.757006  |
| 47 | 1 | 0 | 0.398241  | -2.711847 | 1.035532  |
| 48 | 1 | 0 | 1.716671  | -3.754064 | 1.588674  |
| 49 | 6 | 0 | 0.319604  | -1.030902 | -2.124954 |
| 50 | 6 | 0 | 1.631244  | -1.609478 | -1.821978 |
| 51 | 6 | 0 | 1.804225  | -2.971170 | -1.504091 |
| 52 | 6 | 0 | 2.774925  | -0.796540 | -1.965823 |
| 53 | 6 | 0 | 3.080431  | -3.502314 | -1.383537 |
| 54 | 1 | 0 | 0.942511  | -3.612587 | -1.378402 |
| 55 | 6 | 0 | 4.044049  | -1.334820 | -1.835335 |
| 56 | 1 | 0 | 2.657940  | 0.264019  | -2.164414 |
| 57 | 6 | 0 | 4.200686  | -2.691523 | -1.553257 |
| 58 | 1 | 0 | 3.201225  | -4.558715 | -1.166444 |
| 59 | 1 | 0 | 4.912303  | -0.696325 | -1.960547 |
| 60 | 1 | 0 | 5.195775  | -3.116644 | -1.462216 |
| 61 | 6 | 0 | -0.936594 | -1.882266 | -1.945456 |
| 62 | 8 | 0 | -1.070212 | -2.739158 | -1.096980 |
| 63 | 8 | 0 | -1.851418 | -1.574266 | -2.850002 |
| 64 | 6 | 0 | -3.113519 | -2.242071 | -2.710375 |
| 65 | 1 | 0 | -3.706277 | -1.914904 | -3.562259 |
| 66 | 1 | 0 | -2.974122 | -3.324531 | -2.724511 |
| 67 | 1 | 0 | -3.584694 | -1.938632 | -1.771611 |
| 68 | 6 | 0 | -0.119626 | 1.115843  | -2.277601 |
| 69 | 6 | 0 | 0.259034  | 0.112192  | -3.062170 |
| 70 | 1 | 0 | 0.605080  | 0.087401  | -4.092659 |
| 71 | 6 | 0 | -0.131791 | 2.593662  | -2.614013 |
| 72 | 1 | 0 | 0.854320  | 2.871629  | -3.008411 |
| 73 | 1 | 0 | -0.871419 | 2.727711  | -3.410513 |
| 74 | 8 | 0 | -0.525939 | 3.467427  | -1.591031 |
| 75 | 6 | 0 | 0.375071  | 3.606147  | -0.502810 |
| 76 | 1 | 0 | 0.285818  | 2.735145  | 0.173896  |
| 77 | 1 | 0 | 0.011685  | 4.479244  | 0.046725  |
| 78 | 6 | 0 | 1.813478  | 3.768461  | -0.892883 |
| 79 | 6 | 0 | 2.746977  | 2.840686  | -0.647108 |
| 80 | 1 | 0 | 2.079772  | 4.685865  | -1.417073 |
| 81 | 1 | 0 | 2.466677  | 1.921504  | -0.126556 |
| 82 | 6 | 0 | 4.149809  | 2.962656  | -1.032052 |
| 83 | 6 | 0 | 5.058402  | 2.010264  | -0.801262 |
| 84 | 1 | 0 | 4.442922  | 3.883136  | -1.534584 |
| 85 | 1 | 0 | 6.095557  | 2.126140  | -1.099344 |

86 1 0 4.783800 1.088398 -0.294681

-----  
Zero-point correction= 0.722968 (Hartree/Particle)  
Thermal correction to Energy= 0.767362  
Thermal correction to Enthalpy= 0.768306  
Thermal correction to Gibbs Free Energy= 0.644758  
Sum of electronic and zero-point Energies= -1942.419240  
Sum of electronic and thermal Energies= -1942.374846  
Sum of electronic and thermal Enthalpies= -1942.373901  
Sum of electronic and thermal Free Energies= -1942.497449  
ωB97XD /6-311++G(d,p)-SDD/SMD//ωB97XD /6-31G(d)-LANL2DZ energy in chloroform solvent = -1944.0196474

### INT5b

-----

| Center<br>Number | Atomic<br>Number | Atomic<br>Type | Coordinates (Angstroms) |           |           |
|------------------|------------------|----------------|-------------------------|-----------|-----------|
|                  |                  |                | X                       | Y         | Z         |
| 1                | 6                | 0              | -1.339385               | -3.848516 | 1.348391  |
| 2                | 6                | 0              | -2.460416               | -3.121654 | 1.570078  |
| 3                | 6                | 0              | -0.983287               | -1.788778 | 0.519362  |
| 4                | 7                | 0              | -0.445323               | -3.011977 | 0.704754  |
| 5                | 1                | 0              | -1.092364               | -4.872239 | 1.579903  |
| 6                | 1                | 0              | -3.398538               | -3.374970 | 2.037791  |
| 7                | 7                | 0              | -2.222680               | -1.859980 | 1.051804  |
| 8                | 79               | 0              | -0.108844               | -0.189064 | -0.429977 |
| 9                | 6                | 0              | 0.827907                | -3.418460 | 0.170083  |
| 10               | 6                | 0              | 1.948936                | -3.447099 | 0.999384  |
| 11               | 6                | 0              | 0.883939                | -3.760004 | -1.188789 |
| 12               | 6                | 0              | 3.161526                | -3.835039 | 0.429101  |
| 13               | 6                | 0              | 2.117728                | -4.137499 | -1.707856 |
| 14               | 6                | 0              | 3.267133                | -4.181980 | -0.914892 |
| 15               | 1                | 0              | 4.048851                | -3.857685 | 1.057637  |
| 16               | 1                | 0              | 2.185542                | -4.405789 | -2.759302 |
| 17               | 6                | 0              | -3.211619               | -0.820928 | 0.947423  |
| 18               | 6                | 0              | -3.301972               | 0.148593  | 1.949230  |
| 19               | 6                | 0              | -4.051219               | -0.829577 | -0.170807 |
| 20               | 6                | 0              | -4.289086               | 1.122665  | 1.817142  |
| 21               | 6                | 0              | -5.013791               | 0.173981  | -0.263823 |
| 22               | 6                | 0              | -5.150413               | 1.154676  | 0.718473  |
| 23               | 1                | 0              | -4.386094               | 1.882118  | 2.589577  |
| 24               | 1                | 0              | -5.674098               | 0.190124  | -1.127166 |
| 25               | 6                | 0              | -0.337318               | -3.700249 | -2.071527 |
| 26               | 1                | 0              | -1.223862               | -4.110360 | -1.576578 |
| 27               | 1                | 0              | -0.567071               | -2.664794 | -2.352544 |
| 28               | 1                | 0              | -0.173328               | -4.262819 | -2.993734 |
| 29               | 6                | 0              | 4.584403                | -4.629975 | -1.493539 |
| 30               | 1                | 0              | 4.642706                | -4.421801 | -2.565737 |
| 31               | 1                | 0              | 5.425642                | -4.132211 | -1.002270 |
| 32               | 1                | 0              | 4.716655                | -5.709916 | -1.359239 |
| 33               | 6                | 0              | 1.905557                | -3.052023 | 2.452318  |
| 34               | 1                | 0              | 2.340918                | -3.835458 | 3.080645  |
| 35               | 1                | 0              | 2.494160                | -2.140723 | 2.595251  |
| 36               | 1                | 0              | 0.889281                | -2.863031 | 2.807990  |
| 37               | 6                | 0              | -3.893667               | -1.867276 | -1.251826 |
| 38               | 1                | 0              | -2.905053               | -1.796752 | -1.721411 |
| 39               | 1                | 0              | -3.993252               | -2.884105 | -0.856677 |
| 40               | 1                | 0              | -4.647666               | -1.734008 | -2.031174 |
| 41               | 6                | 0              | -6.173608               | 2.251275  | 0.587167  |
| 42               | 1                | 0              | -5.682784               | 3.195263  | 0.323343  |
| 43               | 1                | 0              | -6.911000               | 2.023333  | -0.186811 |
| 44               | 1                | 0              | -6.705258               | 2.410083  | 1.530661  |
| 45               | 6                | 0              | -2.333239               | 0.171059  | 3.101237  |
| 46               | 1                | 0              | -2.185252               | -0.821601 | 3.538496  |
| 47               | 1                | 0              | -1.355692               | 0.528551  | 2.757438  |
| 48               | 1                | 0              | -2.680212               | 0.843520  | 3.889773  |
| 49               | 6                | 0              | 2.689166                | 1.960592  | -0.093254 |
| 50               | 6                | 0              | 3.881044                | 2.776224  | 0.113757  |

|    |   |   |           |           |           |
|----|---|---|-----------|-----------|-----------|
| 51 | 6 | 0 | 4.944858  | 2.289893  | 0.897745  |
| 52 | 6 | 0 | 3.990651  | 4.056803  | -0.462382 |
| 53 | 6 | 0 | 6.091715  | 3.049494  | 1.071873  |
| 54 | 1 | 0 | 4.888172  | 1.299342  | 1.335674  |
| 55 | 6 | 0 | 5.132374  | 4.817542  | -0.267594 |
| 56 | 1 | 0 | 3.163509  | 4.477048  | -1.024365 |
| 57 | 6 | 0 | 6.187920  | 4.312695  | 0.491684  |
| 58 | 1 | 0 | 6.913461  | 2.655938  | 1.660546  |
| 59 | 1 | 0 | 5.200435  | 5.808357  | -0.703955 |
| 60 | 1 | 0 | 7.083870  | 4.907933  | 0.636160  |
| 61 | 6 | 0 | 2.428533  | 0.935178  | 0.983016  |
| 62 | 8 | 0 | 2.948493  | -0.154164 | 0.995556  |
| 63 | 8 | 0 | 1.657118  | 1.443567  | 1.935006  |
| 64 | 6 | 0 | 1.423712  | 0.591045  | 3.064525  |
| 65 | 1 | 0 | 0.823034  | 1.182705  | 3.752580  |
| 66 | 1 | 0 | 0.885637  | -0.305242 | 2.747342  |
| 67 | 1 | 0 | 2.372186  | 0.307822  | 3.526086  |
| 68 | 6 | 0 | 0.701339  | 1.357568  | -1.462028 |
| 69 | 6 | 0 | 1.871571  | 2.097889  | -1.190678 |
| 70 | 1 | 0 | 2.186745  | 2.833588  | -1.931733 |
| 71 | 6 | 0 | 0.052075  | 1.809509  | -2.737454 |
| 72 | 1 | 0 | -0.179130 | 2.882343  | -2.602506 |
| 73 | 1 | 0 | 0.814243  | 1.760191  | -3.529566 |
| 74 | 8 | 0 | -1.042783 | 1.104393  | -3.227701 |
| 75 | 6 | 0 | -2.286503 | 1.258842  | -2.539199 |
| 76 | 1 | 0 | -2.307718 | 0.607563  | -1.655941 |
| 77 | 1 | 0 | -3.030684 | 0.883323  | -3.247428 |
| 78 | 6 | 0 | -2.602768 | 2.660212  | -2.113656 |
| 79 | 6 | 0 | -2.675136 | 3.004021  | -0.821831 |
| 80 | 1 | 0 | -2.780548 | 3.400092  | -2.893813 |
| 81 | 1 | 0 | -2.490387 | 2.239734  | -0.064822 |
| 82 | 6 | 0 | -3.005051 | 4.335642  | -0.325206 |
| 83 | 6 | 0 | -3.072239 | 4.629852  | 0.976944  |
| 84 | 1 | 0 | -3.203820 | 5.106948  | -1.068046 |
| 85 | 1 | 0 | -3.317527 | 5.626997  | 1.327629  |
| 86 | 1 | 0 | -2.879816 | 3.872801  | 1.734149  |

-----  
Zero-point correction= 0.723118 (Hartree/Particle)  
Thermal correction to Energy= 0.768774  
Thermal correction to Enthalpy= 0.769719  
Thermal correction to Gibbs Free Energy= 0.637439  
Sum of electronic and zero-point Energies= -1942.443327  
Sum of electronic and thermal Energies= -1942.397670  
Sum of electronic and thermal Enthalpies= -1942.396726  
Sum of electronic and thermal Free Energies= -1942.529006  
ωB97XD /6-311++G(d,p)-SDD/SMD//ωB97XD /6-31G(d)-LANL2DZ energy in chloroform solvent = -1944.0450894

#### TS4b

-----

| Center<br>Number | Atomic<br>Number | Atomic<br>Type | Coordinates (Angstroms) |          |           |
|------------------|------------------|----------------|-------------------------|----------|-----------|
|                  |                  |                | X                       | Y        | Z         |
| 1                | 6                | 0              | 3.165403                | 3.028903 | 1.000509  |
| 2                | 6                | 0              | 3.919336                | 1.910419 | 1.131634  |
| 3                | 6                | 0              | 1.910257                | 1.291899 | 0.326728  |
| 4                | 7                | 0              | 1.937302                | 2.625327 | 0.506498  |
| 5                | 1                | 0              | 3.379597                | 4.065020 | 1.208692  |
| 6                | 1                | 0              | 4.929532                | 1.765620 | 1.479755  |
| 7                | 7                | 0              | 3.130533                | 0.854486 | 0.710266  |
| 8                | 79               | 0              | 0.451657                | 0.122055 | -0.482232 |
| 9                | 6                | 0              | 0.820554                | 3.481829 | 0.212105  |
| 10               | 6                | 0              | -0.134390               | 3.696357 | 1.209270  |
| 11               | 6                | 0              | 0.713282                | 4.014348 | -1.074220 |
| 12               | 6                | 0              | -1.226531               | 4.496927 | 0.885145  |
| 13               | 6                | 0              | -0.397272               | 4.810328 | -1.347876 |
| 14               | 6                | 0              | -1.372769               | 5.063132 | -0.382503 |
| 15               | 1                | 0              | -1.987600               | 4.676641 | 1.640443  |

|    |   |   |           |           |           |
|----|---|---|-----------|-----------|-----------|
| 16 | 1 | 0 | -0.504498 | 5.241597  | -2.340141 |
| 17 | 6 | 0 | 3.479520  | -0.537773 | 0.709262  |
| 18 | 6 | 0 | 3.371528  | -1.248726 | 1.908538  |
| 19 | 6 | 0 | 3.834542  | -1.144556 | -0.499965 |
| 20 | 6 | 0 | 3.607735  | -2.621816 | 1.870155  |
| 21 | 6 | 0 | 4.069480  | -2.519321 | -0.482769 |
| 22 | 6 | 0 | 3.955778  | -3.273889 | 0.686160  |
| 23 | 1 | 0 | 3.527934  | -3.194751 | 2.791213  |
| 24 | 1 | 0 | 4.361333  | -3.012742 | -1.407586 |
| 25 | 6 | 0 | 1.745029  | 3.709619  | -2.129585 |
| 26 | 1 | 0 | 2.752249  | 3.998110  | -1.808848 |
| 27 | 1 | 0 | 1.772101  | 2.635970  | -2.353394 |
| 28 | 1 | 0 | 1.522190  | 4.242237  | -3.057145 |
| 29 | 6 | 0 | -2.555790 | 5.945223  | -0.689714 |
| 30 | 1 | 0 | -2.691272 | 6.076212  | -1.766818 |
| 31 | 1 | 0 | -3.478697 | 5.526315  | -0.276643 |
| 32 | 1 | 0 | -2.420947 | 6.939248  | -0.247808 |
| 33 | 6 | 0 | -0.010274 | 3.048521  | 2.563149  |
| 34 | 1 | 0 | -0.713607 | 3.494886  | 3.270210  |
| 35 | 1 | 0 | -0.249191 | 1.981190  | 2.495018  |
| 36 | 1 | 0 | 0.998854  | 3.150453  | 2.976799  |
| 37 | 6 | 0 | 3.930011  | -0.360035 | -1.783715 |
| 38 | 1 | 0 | 2.938903  | -0.209612 | -2.230533 |
| 39 | 1 | 0 | 4.369039  | 0.629277  | -1.623722 |
| 40 | 1 | 0 | 4.547523  | -0.891868 | -2.512411 |
| 41 | 6 | 0 | 4.247075  | -4.752720 | 0.678649  |
| 42 | 1 | 0 | 4.003199  | -5.205771 | -0.286830 |
| 43 | 1 | 0 | 5.311699  | -4.934287 | 0.865591  |
| 44 | 1 | 0 | 3.683957  | -5.276693 | 1.456612  |
| 45 | 6 | 0 | 3.035135  | -0.554670 | 3.203392  |
| 46 | 1 | 0 | 3.923977  | -0.077893 | 3.632516  |
| 47 | 1 | 0 | 2.285039  | 0.230766  | 3.066881  |
| 48 | 1 | 0 | 2.659722  | -1.268183 | 3.941833  |
| 49 | 6 | 0 | -2.899019 | -0.895532 | 0.079312  |
| 50 | 6 | 0 | -4.358115 | -0.909089 | 0.321126  |
| 51 | 6 | 0 | -4.859409 | -1.448922 | 1.512026  |
| 52 | 6 | 0 | -5.256233 | -0.411004 | -0.629773 |
| 53 | 6 | 0 | -6.229235 | -1.511572 | 1.736547  |
| 54 | 1 | 0 | -4.173589 | -1.835118 | 2.261915  |
| 55 | 6 | 0 | -6.625846 | -0.469649 | -0.400986 |
| 56 | 1 | 0 | -4.879501 | 0.052801  | -1.536672 |
| 57 | 6 | 0 | -7.115841 | -1.023978 | 0.779318  |
| 58 | 1 | 0 | -6.606035 | -1.938659 | 2.660494  |
| 59 | 1 | 0 | -7.312867 | -0.071245 | -1.140880 |
| 60 | 1 | 0 | -8.185697 | -1.067449 | 0.956765  |
| 61 | 6 | 0 | -2.058057 | -0.583682 | 1.286846  |
| 62 | 8 | 0 | -2.087129 | 0.481102  | 1.852593  |
| 63 | 8 | 0 | -1.315314 | -1.625698 | 1.687629  |
| 64 | 6 | 0 | -0.473316 | -1.374827 | 2.818026  |
| 65 | 1 | 0 | 0.066837  | -2.304757 | 2.992575  |
| 66 | 1 | 0 | 0.225222  | -0.568116 | 2.587579  |
| 67 | 1 | 0 | -1.072419 | -1.102419 | 3.689611  |
| 68 | 6 | 0 | -0.941091 | -1.074678 | -1.514868 |
| 69 | 6 | 0 | -2.362512 | -1.090712 | -1.142199 |
| 70 | 1 | 0 | -3.071380 | -1.299096 | -1.946558 |
| 71 | 6 | 0 | -0.713311 | -0.974034 | -3.015729 |
| 72 | 1 | 0 | -1.389468 | -1.620942 | -3.603905 |
| 73 | 1 | 0 | -0.888157 | 0.061945  | -3.323646 |
| 74 | 8 | 0 | 0.628255  | -1.278285 | -3.283330 |
| 75 | 6 | 0 | 0.915286  | -2.527447 | -2.688603 |
| 76 | 1 | 0 | 1.988696  | -2.563976 | -2.495207 |
| 77 | 1 | 0 | 0.652334  | -3.336872 | -3.384332 |
| 78 | 6 | 0 | 0.139808  | -2.717565 | -1.382554 |
| 79 | 6 | 0 | -1.024646 | -3.463693 | -1.373810 |
| 80 | 1 | 0 | 0.699387  | -2.651082 | -0.453365 |
| 81 | 1 | 0 | -1.528995 | -3.632538 | -2.326018 |
| 82 | 6 | 0 | -1.681145 | -3.964917 | -0.201328 |

|    |   |   |           |           |           |
|----|---|---|-----------|-----------|-----------|
| 83 | 6 | 0 | -2.946018 | -4.412002 | -0.260767 |
| 84 | 1 | 0 | -1.155401 | -3.907000 | 0.744951  |
| 85 | 1 | 0 | -3.470261 | -4.758822 | 0.623545  |
| 86 | 1 | 0 | -3.495687 | -4.440559 | -1.198330 |

-----  
Zero-point correction= 0.723679 (Hartree/Particle)  
Thermal correction to Energy= 0.768369  
Thermal correction to Enthalpy= 0.769313  
Thermal correction to Gibbs Free Energy= 0.641518  
Sum of electronic and zero-point Energies= -1942.432786  
Sum of electronic and thermal Energies= -1942.388096  
Sum of electronic and thermal Enthalpies= -1942.387152  
Sum of electronic and thermal Free Energies= -1942.514947  
ωB97XD /6-311++G(d,p)-SDD/SMD//ωB97XD /6-31G(d)-LANL2DZ energy in chloroform solvent = -1944.0351096

## INT6b

-----

| Center<br>Number | Atomic<br>Number | Atomic<br>Type | Coordinates (Angstroms) |           |           |
|------------------|------------------|----------------|-------------------------|-----------|-----------|
|                  |                  |                | X                       | Y         | Z         |
| 1                | 6                | 0              | -0.777700               | 0.131759  | -0.080693 |
| 2                | 6                | 0              | -2.235478               | -0.151205 | -0.153476 |
| 3                | 6                | 0              | -3.088174               | 0.112941  | 0.924963  |
| 4                | 6                | 0              | -2.776157               | -0.698435 | -1.322910 |
| 5                | 6                | 0              | -4.444211               | -0.182171 | 0.835839  |
| 6                | 1                | 0              | -2.679611               | 0.540866  | 1.833719  |
| 7                | 6                | 0              | -4.131607               | -0.995258 | -1.406942 |
| 8                | 1                | 0              | -2.130962               | -0.870754 | -2.179617 |
| 9                | 6                | 0              | -4.970780               | -0.738439 | -0.326482 |
| 10               | 1                | 0              | -5.092474               | 0.023110  | 1.682653  |
| 11               | 1                | 0              | -4.534694               | -1.416314 | -2.323213 |
| 12               | 1                | 0              | -6.031076               | -0.963028 | -0.393710 |
| 13               | 6                | 0              | -0.360076               | 1.388114  | 0.624290  |
| 14               | 8                | 0              | -0.583829               | 1.632897  | 1.788433  |
| 15               | 8                | 0              | 0.290032                | 2.229494  | -0.190851 |
| 16               | 6                | 0              | 0.732772                | 3.444525  | 0.416405  |
| 17               | 1                | 0              | 1.261567                | 3.985503  | -0.367553 |
| 18               | 1                | 0              | -0.120376               | 4.023544  | 0.777379  |
| 19               | 1                | 0              | 1.400066                | 3.233316  | 1.255893  |
| 20               | 6                | 0              | 1.613935                | -0.505895 | -0.572585 |
| 21               | 6                | 0              | 0.142629                | -0.705501 | -0.576947 |
| 22               | 1                | 0              | -0.205673               | -1.640589 | -1.014601 |
| 23               | 6                | 0              | 2.270369                | 0.107745  | -1.808347 |
| 24               | 1                | 0              | 2.397722                | -0.594212 | -2.638172 |
| 25               | 1                | 0              | 1.666936                | 0.963754  | -2.143047 |
| 26               | 8                | 0              | 3.562677                | 0.514602  | -1.395296 |
| 27               | 6                | 0              | 3.486374                | 0.903721  | -0.033413 |
| 28               | 1                | 0              | 3.191402                | 1.960218  | 0.061931  |
| 29               | 1                | 0              | 4.483887                | 0.776652  | 0.397489  |
| 30               | 6                | 0              | 2.429739                | 0.009415  | 0.579849  |
| 31               | 6                | 0              | 2.521992                | -1.453022 | 0.196212  |
| 32               | 1                | 0              | 1.975677                | 0.282496  | 1.527944  |
| 33               | 1                | 0              | 3.434108                | -1.758096 | -0.314976 |
| 34               | 6                | 0              | 1.926191                | -2.468603 | 1.090181  |
| 35               | 6                | 0              | 2.418032                | -3.693290 | 1.265382  |
| 36               | 1                | 0              | 1.026137                | -2.169804 | 1.627963  |
| 37               | 1                | 0              | 1.946327                | -4.402933 | 1.937783  |
| 38               | 1                | 0              | 3.312910                | -4.028086 | 0.745898  |

-----

Zero-point correction= 0.317985 (Hartree/Particle)  
Thermal correction to Energy= 0.336289  
Thermal correction to Enthalpy= 0.337233  
Thermal correction to Gibbs Free Energy= 0.269967  
Sum of electronic and zero-point Energies= -883.650400  
Sum of electronic and thermal Energies= -883.632096  
Sum of electronic and thermal Enthalpies= -883.631152  
Sum of electronic and thermal Free Energies= -883.698418

ωB97XD /6-311++G(d,p)-SDD/SMD//ωB97XD /6-31G(d)-LANL2DZ energy in chloroform solvent = -884.2128507

**TS5b**

| Center Number | Atomic Number | Atomic Type | Coordinates (Angstroms) |           |           |
|---------------|---------------|-------------|-------------------------|-----------|-----------|
|               |               |             | X                       | Y         | Z         |
| 1             | 6             | 0           | 1.898558                | -0.605952 | -0.604965 |
| 2             | 6             | 0           | 0.533404                | -0.689858 | -0.801597 |
| 3             | 1             | 0           | 0.181580                | -1.608882 | -1.270589 |
| 4             | 6             | 0           | 2.908103                | -1.471203 | -1.336384 |
| 5             | 1             | 0           | 2.710809                | -2.545834 | -1.273517 |
| 6             | 1             | 0           | 2.922077                | -1.181053 | -2.399121 |
| 7             | 8             | 0           | 4.162337                | -1.215982 | -0.733136 |
| 8             | 6             | 0           | 4.119853                | 0.102713  | -0.210367 |
| 9             | 1             | 0           | 4.328789                | 0.846807  | -0.993206 |
| 10            | 1             | 0           | 4.883448                | 0.173928  | 0.568406  |
| 11            | 6             | 0           | 2.696510                | 0.280560  | 0.302442  |
| 12            | 6             | 0           | 2.310951                | -0.723200 | 1.336127  |
| 13            | 1             | 0           | 2.364580                | 1.308126  | 0.429864  |
| 14            | 1             | 0           | 2.981435                | -1.571696 | 1.444984  |
| 15            | 6             | 0           | 1.152954                | -0.665302 | 2.104329  |
| 16            | 6             | 0           | 0.234349                | 0.360059  | 1.981248  |
| 17            | 1             | 0           | 0.873007                | -1.563285 | 2.651843  |
| 18            | 1             | 0           | -0.720017               | 0.314594  | 2.495930  |
| 19            | 1             | 0           | 0.585381                | 1.358200  | 1.748641  |
| 20            | 6             | 0           | -0.463919               | 0.144456  | -0.259400 |
| 21            | 6             | 0           | -1.835477               | -0.447383 | -0.205379 |
| 22            | 6             | 0           | -1.991894               | -1.695703 | 0.409503  |
| 23            | 6             | 0           | -2.957284               | 0.137650  | -0.804299 |
| 24            | 6             | 0           | -3.223725               | -2.340251 | 0.431441  |
| 25            | 1             | 0           | -1.130401               | -2.153888 | 0.888984  |
| 26            | 6             | 0           | -4.189816               | -0.504971 | -0.782987 |
| 27            | 1             | 0           | -2.866700               | 1.099898  | -1.294684 |
| 28            | 6             | 0           | -4.330648               | -1.744812 | -0.165235 |
| 29            | 1             | 0           | -3.319378               | -3.305536 | 0.920136  |
| 30            | 1             | 0           | -5.045947               | -0.035065 | -1.258516 |
| 31            | 1             | 0           | -5.296112               | -2.241619 | -0.148406 |
| 32            | 6             | 0           | -0.289032               | 1.616871  | -0.329253 |
| 33            | 8             | 0           | 0.675309                | 2.199741  | -0.784252 |
| 34            | 8             | 0           | -1.333844               | 2.287010  | 0.202839  |
| 35            | 6             | 0           | -1.219189               | 3.705167  | 0.178927  |
| 36            | 1             | 0           | -2.146156               | 4.081256  | 0.611742  |
| 37            | 1             | 0           | -0.361629               | 4.033818  | 0.772698  |
| 38            | 1             | 0           | -1.097361               | 4.071042  | -0.843691 |

Zero-point correction= 0.318050 (Hartree/Particle)

Thermal correction to Energy= 0.334959

Thermal correction to Enthalpy= 0.335903

Thermal correction to Gibbs Free Energy= 0.273942

Sum of electronic and zero-point Energies= -883.615990

Sum of electronic and thermal Energies= -883.599081

Sum of electronic and thermal Enthalpies= -883.598137

Sum of electronic and thermal Free Energies= -883.660098

ωB97XD /6-311++G(d,p)-SDD/SMD//ωB97XD /6-31G(d)-LANL2DZ energy in chloroform solvent = -884.1780019

**TS5b'**

| Center Number | Atomic Number | Atomic Type | Coordinates (Angstroms) |           |           |
|---------------|---------------|-------------|-------------------------|-----------|-----------|
|               |               |             | X                       | Y         | Z         |
| 1             | 6             | 0           | -1.893931               | -0.770657 | -0.332918 |
| 2             | 6             | 0           | -0.521033               | -1.017834 | -0.319146 |
| 3             | 1             | 0           | -0.255310               | -1.969753 | 0.147703  |
| 4             | 6             | 0           | -2.859070               | -0.155130 | -1.327949 |
| 5             | 1             | 0           | -2.745273               | 0.915928  | -1.490395 |
| 6             | 1             | 0           | -2.734244               | -0.669010 | -2.291732 |



|    |   |   |           |           |           |
|----|---|---|-----------|-----------|-----------|
| 7  | 8 | 0 | -4.161017 | -0.390270 | -0.798183 |
| 8  | 6 | 0 | -4.111935 | -1.458317 | 0.136000  |
| 9  | 1 | 0 | -4.237849 | -2.433020 | -0.359783 |
| 10 | 1 | 0 | -4.931018 | -1.310487 | 0.846255  |
| 11 | 6 | 0 | -2.724530 | -1.366658 | 0.748630  |
| 12 | 6 | 0 | -2.458397 | 0.003770  | 1.334093  |
| 13 | 1 | 0 | -2.335236 | -2.234028 | 1.282872  |
| 14 | 1 | 0 | -3.302333 | 0.677416  | 1.195594  |
| 15 | 6 | 0 | -1.335579 | 0.591202  | 1.909499  |
| 16 | 6 | 0 | -0.008092 | 0.122836  | 1.920926  |
| 17 | 1 | 0 | -1.467137 | 1.645921  | 2.144706  |
| 18 | 1 | 0 | 0.725644  | 0.786315  | 2.372417  |
| 19 | 1 | 0 | 0.208315  | -0.926137 | 2.092293  |
| 20 | 6 | 0 | 0.474802  | -0.044945 | -0.086649 |
| 21 | 6 | 0 | 0.233029  | 1.350952  | -0.605947 |
| 22 | 8 | 0 | -0.475932 | 1.620332  | -1.547354 |
| 23 | 8 | 0 | 0.907407  | 2.287318  | 0.080449  |
| 24 | 6 | 0 | 0.747759  | 3.622561  | -0.394224 |
| 25 | 1 | 0 | 1.070616  | 3.703950  | -1.434775 |
| 26 | 1 | 0 | -0.298044 | 3.931305  | -0.321139 |
| 27 | 1 | 0 | 1.373916  | 4.239263  | 0.249986  |
| 28 | 6 | 0 | 1.913883  | -0.489458 | -0.080853 |
| 29 | 6 | 0 | 2.275150  | -1.614204 | -0.830956 |
| 30 | 6 | 0 | 2.913758  | 0.175058  | 0.639573  |
| 31 | 6 | 0 | 3.587409  | -2.076733 | -0.843197 |
| 32 | 1 | 0 | 1.518744  | -2.117282 | -1.425327 |
| 33 | 6 | 0 | 4.225289  | -0.284288 | 0.623718  |
| 34 | 1 | 0 | 2.664467  | 1.060848  | 1.211475  |
| 35 | 6 | 0 | 4.568366  | -1.414947 | -0.113276 |
| 36 | 1 | 0 | 3.842276  | -2.951883 | -1.433787 |
| 37 | 1 | 0 | 4.983696  | 0.244689  | 1.193588  |
| 38 | 1 | 0 | 5.593834  | -1.772320 | -0.123182 |

-----  
Zero-point correction= 0.317522 (Hartree/Particle)  
Thermal correction to Energy= 0.334643  
Thermal correction to Enthalpy= 0.335587  
Thermal correction to Gibbs Free Energy= 0.272187  
Sum of electronic and zero-point Energies= -883.585149  
Sum of electronic and thermal Energies= -883.568028  
Sum of electronic and thermal Enthalpies= -883.567084  
Sum of electronic and thermal Free Energies= -883.630485  
ωB97XD /6-311++G(d,p)-SDD/SMD//ωB97XD /6-31G(d)-LANL2DZ energy in chloroform solvent = -884.145402

### 3b

| Center Number | Atomic Number | Atomic Type | Coordinates (Angstroms) |           |           |
|---------------|---------------|-------------|-------------------------|-----------|-----------|
|               |               |             | X                       | Y         | Z         |
| 1             | 6             | 0           | 2.058199                | 0.348134  | -0.568118 |
| 2             | 6             | 0           | 0.767558                | 0.416076  | -0.882137 |
| 3             | 1             | 0           | 0.496454                | 0.411003  | -1.935879 |
| 4             | 6             | 0           | 3.173607                | 0.203049  | -1.577372 |
| 5             | 1             | 0           | 2.876650                | -0.319423 | -2.489563 |
| 6             | 1             | 0           | 3.586517                | 1.189330  | -1.854541 |
| 7             | 8             | 0           | 4.150624                | -0.572872 | -0.911771 |
| 8             | 6             | 0           | 4.178355                | -0.106019 | 0.423149  |
| 9             | 1             | 0           | 4.831304                | 0.777185  | 0.501997  |
| 10            | 1             | 0           | 4.595776                | -0.900350 | 1.047673  |
| 11            | 6             | 0           | 2.724566                | 0.266731  | 0.798950  |
| 12            | 6             | 0           | 2.021697                | -0.699204 | 1.722303  |
| 13            | 1             | 0           | 2.718948                | 1.261426  | 1.267130  |
| 14            | 1             | 0           | 2.580974                | -1.555832 | 2.093079  |
| 15            | 6             | 0           | 0.745644                | -0.524075 | 2.057062  |
| 16            | 6             | 0           | -0.064052               | 0.638352  | 1.541698  |
| 17            | 1             | 0           | 0.248192                | -1.244096 | 2.701116  |
| 18            | 1             | 0           | -0.986847               | 0.740394  | 2.115856  |
| 19            | 1             | 0           | 0.491271                | 1.576281  | 1.672389  |

|    |   |   |           |           |           |
|----|---|---|-----------|-----------|-----------|
| 20 | 6 | 0 | -0.435097 | 0.489565  | 0.042550  |
| 21 | 6 | 0 | -1.315647 | -0.764498 | -0.122897 |
| 22 | 6 | 0 | -0.768908 | -1.971391 | -0.558253 |
| 23 | 6 | 0 | -2.665966 | -0.731999 | 0.236647  |
| 24 | 6 | 0 | -1.555570 | -3.116867 | -0.642994 |
| 25 | 1 | 0 | 0.282930  | -2.015923 | -0.821266 |
| 26 | 6 | 0 | -3.453750 | -1.874455 | 0.149209  |
| 27 | 1 | 0 | -3.108983 | 0.193065  | 0.596056  |
| 28 | 6 | 0 | -2.901131 | -3.072765 | -0.293907 |
| 29 | 1 | 0 | -1.110981 | -4.046976 | -0.984827 |
| 30 | 1 | 0 | -4.502730 | -1.826131 | 0.426738  |
| 31 | 1 | 0 | -3.514781 | -3.965995 | -0.363751 |
| 32 | 6 | 0 | -1.257867 | 1.691328  | -0.458046 |
| 33 | 8 | 0 | -1.402713 | 1.977128  | -1.621996 |
| 34 | 8 | 0 | -1.831024 | 2.387797  | 0.537451  |
| 35 | 6 | 0 | -2.636367 | 3.490576  | 0.118737  |
| 36 | 1 | 0 | -3.024926 | 3.934592  | 1.034655  |
| 37 | 1 | 0 | -2.033707 | 4.213747  | -0.435407 |
| 38 | 1 | 0 | -3.452781 | 3.146065  | -0.520409 |

-----  
Zero-point correction= 0.320293 (Hartree/Particle)  
Thermal correction to Energy= 0.337544  
Thermal correction to Enthalpy= 0.338488  
Thermal correction to Gibbs Free Energy= 0.274099  
Sum of electronic and zero-point Energies= -883.673850  
Sum of electronic and thermal Energies= -883.656598  
Sum of electronic and thermal Enthalpies= -883.655654  
Sum of electronic and thermal Free Energies= -883.720043  
ωB97XD /6-311++G(d,p)-SDD/SMD//ωB97XD /6-31G(d)-LANL2DZ energy in chloroform solvent = -884.2392756

#### TS8b

-----

| Center<br>Number | Atomic<br>Number | Atomic<br>Type | Coordinates (Angstroms) |           |           |
|------------------|------------------|----------------|-------------------------|-----------|-----------|
|                  |                  |                | X                       | Y         | Z         |
| 1                | 6                | 0              | -1.246467               | -4.057992 | 0.830712  |
| 2                | 6                | 0              | 0.028470                | -4.291519 | 0.434366  |
| 3                | 6                | 0              | -0.368089               | -2.097828 | 0.165670  |
| 4                | 7                | 0              | -1.469029               | -2.703865 | 0.656540  |
| 5                | 1                | 0              | -2.007670               | -4.718888 | 1.213696  |
| 6                | 1                | 0              | 0.610253                | -5.198881 | 0.399537  |
| 7                | 7                | 0              | 0.549358                | -3.073876 | 0.030985  |
| 8                | 79               | 0              | -0.271505               | -0.116434 | -0.298650 |
| 9                | 6                | 0              | -2.664919               | -1.974319 | 0.975450  |
| 10               | 6                | 0              | -3.641327               | -1.821319 | -0.009947 |
| 11               | 6                | 0              | -2.756015               | -1.373321 | 2.236064  |
| 12               | 6                | 0              | -4.761163               | -1.052257 | 0.308183  |
| 13               | 6                | 0              | -3.888547               | -0.608352 | 2.502605  |
| 14               | 6                | 0              | -4.903606               | -0.444519 | 1.555168  |
| 15               | 1                | 0              | -5.537277               | -0.922012 | -0.441937 |
| 16               | 1                | 0              | -3.987819               | -0.133401 | 3.475862  |
| 17               | 6                | 0              | 1.894463                | -2.833268 | -0.413277 |
| 18               | 6                | 0              | 2.146108                | -2.725630 | -1.781420 |
| 19               | 6                | 0              | 2.887190                | -2.665997 | 0.558592  |
| 20               | 6                | 0              | 3.456760                | -2.446967 | -2.172810 |
| 21               | 6                | 0              | 4.178631                | -2.395514 | 0.116160  |
| 22               | 6                | 0              | 4.481842                | -2.280747 | -1.243521 |
| 23               | 1                | 0              | 3.679555                | -2.362593 | -3.233699 |
| 24               | 1                | 0              | 4.970136                | -2.264929 | 0.850805  |
| 25               | 6                | 0              | -1.652508               | -1.533532 | 3.250349  |
| 26               | 1                | 0              | -1.475168               | -2.588513 | 3.486115  |
| 27               | 1                | 0              | -0.704605               | -1.128039 | 2.875026  |
| 28               | 1                | 0              | -1.901808               | -1.019509 | 4.182010  |
| 29               | 6                | 0              | -6.133089               | 0.360878  | 1.891115  |
| 30               | 1                | 0              | -5.871585               | 1.299515  | 2.390565  |
| 31               | 1                | 0              | -6.715656               | 0.597591  | 0.995734  |
| 32               | 1                | 0              | -6.786684               | -0.198462 | 2.569782  |

|    |   |   |           |           |           |
|----|---|---|-----------|-----------|-----------|
| 33 | 6 | 0 | -3.463370 | -2.425325 | -1.378001 |
| 34 | 1 | 0 | -4.350170 | -2.260991 | -1.994269 |
| 35 | 1 | 0 | -2.604446 | -1.974726 | -1.889891 |
| 36 | 1 | 0 | -3.281547 | -3.503884 | -1.324549 |
| 37 | 6 | 0 | 2.555394  | -2.727274 | 2.027499  |
| 38 | 1 | 0 | 1.845674  | -1.936003 | 2.297360  |
| 39 | 1 | 0 | 2.103698  | -3.685168 | 2.306539  |
| 40 | 1 | 0 | 3.456536  | -2.594872 | 2.631498  |
| 41 | 6 | 0 | 5.894419  | -1.991193 | -1.681536 |
| 42 | 1 | 0 | 6.279117  | -1.088178 | -1.195936 |
| 43 | 1 | 0 | 6.562505  | -2.816311 | -1.411320 |
| 44 | 1 | 0 | 5.959669  | -1.847817 | -2.763362 |
| 45 | 6 | 0 | 1.044365  | -2.870441 | -2.799688 |
| 46 | 1 | 0 | 0.383103  | -3.711694 | -2.568733 |
| 47 | 1 | 0 | 0.422088  | -1.967101 | -2.832081 |
| 48 | 1 | 0 | 1.460001  | -3.028578 | -3.797983 |
| 49 | 6 | 0 | -0.391607 | 1.841794  | -0.950996 |
| 50 | 6 | 0 | -1.699411 | 2.445957  | -1.190351 |
| 51 | 6 | 0 | -1.863940 | 3.501073  | -2.108954 |
| 52 | 6 | 0 | -2.833133 | 1.954774  | -0.515583 |
| 53 | 6 | 0 | -3.120314 | 4.028277  | -2.360756 |
| 54 | 1 | 0 | -1.001946 | 3.897947  | -2.638372 |
| 55 | 6 | 0 | -4.086969 | 2.495065  | -0.757385 |
| 56 | 1 | 0 | -2.723215 | 1.146284  | 0.202153  |
| 57 | 6 | 0 | -4.232708 | 3.527978  | -1.682070 |
| 58 | 1 | 0 | -3.237553 | 4.829971  | -3.082330 |
| 59 | 1 | 0 | -4.951258 | 2.103539  | -0.231024 |
| 60 | 1 | 0 | -5.214954 | 3.948048  | -1.875024 |
| 61 | 6 | 0 | 0.743484  | 2.135422  | -1.903732 |
| 62 | 8 | 0 | 1.795025  | 2.680770  | -1.662866 |
| 63 | 8 | 0 | 0.430459  | 1.590931  | -3.083572 |
| 64 | 6 | 0 | 1.485599  | 1.568280  | -4.055459 |
| 65 | 1 | 0 | 1.042310  | 1.132952  | -4.949064 |
| 66 | 1 | 0 | 1.846142  | 2.579229  | -4.253509 |
| 67 | 1 | 0 | 2.310467  | 0.950489  | -3.692464 |
| 68 | 6 | 0 | 0.386453  | 2.613274  | 1.316056  |
| 69 | 6 | 0 | 0.291070  | 3.444369  | 0.431682  |
| 70 | 1 | 0 | 0.300478  | 4.326304  | -0.170506 |
| 71 | 6 | 0 | 0.579577  | 1.659740  | 2.419064  |
| 72 | 1 | 0 | 0.983404  | 2.255821  | 3.252576  |
| 73 | 1 | 0 | -0.383227 | 1.243271  | 2.729290  |
| 74 | 8 | 0 | 1.407229  | 0.571898  | 2.113715  |
| 75 | 6 | 0 | 2.678473  | 0.917811  | 1.538721  |
| 76 | 1 | 0 | 2.523515  | 1.394998  | 0.562001  |
| 77 | 1 | 0 | 3.157673  | -0.049121 | 1.369055  |
| 78 | 6 | 0 | 3.498442  | 1.795056  | 2.430068  |
| 79 | 6 | 0 | 3.873880  | 3.033419  | 2.085432  |
| 80 | 1 | 0 | 3.789601  | 1.380491  | 3.394996  |
| 81 | 1 | 0 | 3.566319  | 3.426393  | 1.114757  |
| 82 | 6 | 0 | 4.690741  | 3.909865  | 2.918501  |
| 83 | 6 | 0 | 5.057345  | 5.140489  | 2.551082  |
| 84 | 1 | 0 | 5.006370  | 3.515609  | 3.883386  |
| 85 | 1 | 0 | 5.667253  | 5.768655  | 3.191979  |
| 86 | 1 | 0 | 4.762446  | 5.558968  | 1.591500  |

-----  
Zero-point correction= 0.718645 (Hartree/Particle)

Thermal correction to Energy= 0.765224

Thermal correction to Enthalpy= 0.766169

Thermal correction to Gibbs Free Energy= 0.633921

Sum of electronic and zero-point Energies= -1942.366226

Sum of electronic and thermal Energies= -1942.319647

Sum of electronic and thermal Enthalpies= -1942.318703

Sum of electronic and thermal Free Energies= -1942.450950

ωB97XD /6-311++G(d,p)-SDD/SMD//ωB97XD /6-31G(d)-LANL2DZ energy in chloroform solvent = -1943.9652076

**INT7b**  
-----

| Center<br>Number | Atomic<br>Number | Atomic<br>Type | Coordinates (Angstroms) |           |           |
|------------------|------------------|----------------|-------------------------|-----------|-----------|
|                  |                  |                | X                       | Y         | Z         |
| 1                | 6                | 0              | -0.664887               | -0.210785 | -0.236208 |
| 2                | 6                | 0              | -2.094126               | -0.552233 | -0.030883 |
| 3                | 6                | 0              | -3.065379               | -0.111467 | -0.936921 |
| 4                | 6                | 0              | -2.495972               | -1.339446 | 1.052342  |
| 5                | 6                | 0              | -4.399147               | -0.463533 | -0.773052 |
| 6                | 1                | 0              | -2.771420               | 0.504434  | -1.782593 |
| 7                | 6                | 0              | -3.831319               | -1.692584 | 1.217122  |
| 8                | 1                | 0              | -1.757871               | -1.657869 | 1.782938  |
| 9                | 6                | 0              | -4.786668               | -1.257141 | 0.304101  |
| 10               | 1                | 0              | -5.138604               | -0.118698 | -1.489590 |
| 11               | 1                | 0              | -4.126551               | -2.300151 | 2.067527  |
| 12               | 1                | 0              | -5.830265               | -1.526810 | 0.435370  |
| 13               | 6                | 0              | -0.325791               | 1.172650  | -0.706783 |
| 14               | 8                | 0              | 0.492921                | 1.438897  | -1.556834 |
| 15               | 8                | 0              | -1.051086               | 2.096384  | -0.062008 |
| 16               | 6                | 0              | -0.739896               | 3.447255  | -0.392616 |
| 17               | 1                | 0              | -1.408275               | 4.059045  | 0.212404  |
| 18               | 1                | 0              | 0.304293                | 3.660432  | -0.148374 |
| 19               | 1                | 0              | -0.905099               | 3.632938  | -1.456859 |
| 20               | 6                | 0              | 1.776006                | -0.824957 | -0.147978 |
| 21               | 6                | 0              | 0.322597                | -1.089863 | -0.011335 |
| 22               | 1                | 0              | 0.044790                | -2.103269 | 0.278551  |
| 23               | 6                | 0              | 2.442216                | -1.189831 | -1.471737 |
| 24               | 1                | 0              | 2.017409                | -2.134396 | -1.849004 |
| 25               | 1                | 0              | 2.322326                | -0.412772 | -2.229365 |
| 26               | 8                | 0              | 3.824042                | -1.326266 | -1.188914 |
| 27               | 6                | 0              | 3.960495                | -1.797372 | 0.140804  |
| 28               | 1                | 0              | 4.941042                | -1.473276 | 0.502393  |
| 29               | 1                | 0              | 3.913171                | -2.897669 | 0.183558  |
| 30               | 6                | 0              | 2.791153                | -1.199378 | 0.895742  |
| 31               | 6                | 0              | 2.507907                | 0.263363  | 0.615860  |
| 32               | 1                | 0              | 2.495263                | -1.621702 | 1.852092  |
| 33               | 1                | 0              | 3.263065                | 0.802099  | 0.046283  |
| 34               | 6                | 0              | 1.800086                | 1.067393  | 1.633607  |
| 35               | 6                | 0              | 2.010444                | 2.366550  | 1.840825  |
| 36               | 1                | 0              | 1.060011                | 0.545087  | 2.239517  |
| 37               | 1                | 0              | 1.466969                | 2.913465  | 2.605112  |
| 38               | 1                | 0              | 2.736428                | 2.925275  | 1.254746  |

-----  
Zero-point correction= 0.318008 (Hartree/Particle)  
Thermal correction to Energy= 0.336138  
Thermal correction to Enthalpy= 0.337083  
Thermal correction to Gibbs Free Energy= 0.271170  
Sum of electronic and zero-point Energies= -883.651119  
Sum of electronic and thermal Energies= -883.632989  
Sum of electronic and thermal Enthalpies= -883.632045  
Sum of electronic and thermal Free Energies= -883.697957  
 $\omega$ B97XD /6-311++G(d,p)-SDD/SMD// $\omega$ B97XD /6-31G(d)-LANL2DZ energy in chloroform solvent = -884.2140565

### TS7b

| Center<br>Number | Atomic<br>Number | Atomic<br>Type | Coordinates (Angstroms) |           |           |
|------------------|------------------|----------------|-------------------------|-----------|-----------|
|                  |                  |                | X                       | Y         | Z         |
| 1                | 6                | 0              | -0.396642               | 0.074776  | -0.017414 |
| 2                | 6                | 0              | -1.818065               | -0.433414 | -0.163512 |
| 3                | 6                | 0              | -2.783505               | 0.309780  | -0.848375 |
| 4                | 6                | 0              | -2.177472               | -1.694084 | 0.320454  |
| 5                | 6                | 0              | -4.069556               | -0.186725 | -1.033155 |
| 6                | 1                | 0              | -2.529265               | 1.283728  | -1.257797 |
| 7                | 6                | 0              | -3.461244               | -2.195474 | 0.134879  |
| 8                | 1                | 0              | -1.446091               | -2.294591 | 0.853775  |
| 9                | 6                | 0              | -4.415396               | -1.441123 | -0.540643 |
| 10               | 1                | 0              | -4.801482               | 0.409437  | -1.570169 |

|    |   |   |           |           |           |
|----|---|---|-----------|-----------|-----------|
| 11 | 1 | 0 | -3.715549 | -3.176683 | 0.524783  |
| 12 | 1 | 0 | -5.419210 | -1.829276 | -0.684333 |
| 13 | 6 | 0 | -0.320068 | 1.580668  | -0.081087 |
| 14 | 8 | 0 | 0.295656  | 2.225541  | -0.899859 |
| 15 | 8 | 0 | -1.052456 | 2.152133  | 0.888644  |
| 16 | 6 | 0 | -1.085896 | 3.576924  | 0.874733  |
| 17 | 1 | 0 | -1.724268 | 3.862652  | 1.710103  |
| 18 | 1 | 0 | -0.081669 | 3.989425  | 1.000723  |
| 19 | 1 | 0 | -1.502478 | 3.943019  | -0.067264 |
| 20 | 6 | 0 | 1.943104  | -0.509027 | -0.769960 |
| 21 | 6 | 0 | 0.590612  | -0.688616 | -0.757983 |
| 22 | 1 | 0 | 0.320164  | -1.746475 | -0.717692 |
| 23 | 6 | 0 | 2.822780  | 0.701398  | -0.999089 |
| 24 | 1 | 0 | 2.816788  | 0.932986  | -2.073982 |
| 25 | 1 | 0 | 2.527273  | 1.605073  | -0.464909 |
| 26 | 8 | 0 | 4.129371  | 0.344053  | -0.563486 |
| 27 | 6 | 0 | 4.243037  | -1.068523 | -0.510211 |
| 28 | 1 | 0 | 5.019542  | -1.308818 | 0.220541  |
| 29 | 1 | 0 | 4.528813  | -1.484245 | -1.488899 |
| 30 | 6 | 0 | 2.856482  | -1.555463 | -0.126087 |
| 31 | 6 | 0 | 2.330216  | -1.009775 | 1.189900  |
| 32 | 1 | 0 | 2.628579  | -2.604220 | -0.323974 |
| 33 | 1 | 0 | 2.721096  | -0.019717 | 1.424449  |
| 34 | 6 | 0 | 1.125503  | -1.350203 | 1.743131  |
| 35 | 6 | 0 | 0.147628  | -0.302658 | 1.836563  |
| 36 | 1 | 0 | 0.749470  | -2.360393 | 1.568762  |
| 37 | 1 | 0 | -0.808132 | -0.500715 | 2.319625  |
| 38 | 1 | 0 | 0.546746  | 0.674229  | 2.111001  |

-----  
Zero-point correction= 0.317188 (Hartree/Particle)  
Thermal correction to Energy= 0.334135  
Thermal correction to Enthalpy= 0.335079  
Thermal correction to Gibbs Free Energy= 0.272592  
Sum of electronic and zero-point Energies= -883.565638  
Sum of electronic and thermal Energies= -883.548692  
Sum of electronic and thermal Enthalpies= -883.547748  
Sum of electronic and thermal Free Energies= -883.610234  
ωB97XD /6-311++G(d,p)-SDD/SMD//ωB97XD /6-31G(d)-LANL2DZ energy in chloroform solvent = -884.1277975

#### TS7b'

-----

| Center<br>Number | Atomic<br>Number | Atomic<br>Type | Coordinates (Angstroms) |           |           |
|------------------|------------------|----------------|-------------------------|-----------|-----------|
|                  |                  |                | X                       | Y         | Z         |
| 1                | 6                | 0              | 0.463855                | 0.144340  | -0.259480 |
| 2                | 6                | 0              | 1.835451                | -0.447398 | -0.205367 |
| 3                | 6                | 0              | 2.957117                | 0.137731  | -0.804456 |
| 4                | 6                | 0              | 1.992077                | -1.695645 | 0.409599  |
| 5                | 6                | 0              | 4.189735                | -0.504721 | -0.783224 |
| 6                | 1                | 0              | 2.866317                | 1.099925  | -1.294934 |
| 7                | 6                | 0              | 3.224001                | -2.340022 | 0.431469  |
| 8                | 1                | 0              | 1.130706                | -2.153898 | 0.889230  |
| 9                | 6                | 0              | 4.330785                | -1.744493 | -0.165376 |
| 10               | 1                | 0              | 5.045751                | -0.034762 | -1.258908 |
| 11               | 1                | 0              | 3.319836                | -3.305237 | 0.920266  |
| 12               | 1                | 0              | 5.296315                | -2.241173 | -0.148599 |
| 13               | 6                | 0              | 0.289079                | 1.616790  | -0.329501 |
| 14               | 8                | 0              | -0.675112               | 2.199745  | -0.784691 |
| 15               | 8                | 0              | 1.333805                | 2.286838  | 0.202875  |
| 16               | 6                | 0              | 1.219011                | 3.704989  | 0.179503  |
| 17               | 1                | 0              | 0.362208                | 4.033349  | 0.774553  |
| 18               | 1                | 0              | 2.146491                | 4.081026  | 0.611264  |
| 19               | 1                | 0              | 1.095803                | 4.071217  | -0.842814 |
| 20               | 6                | 0              | -1.898612               | -0.606028 | -0.604906 |
| 21               | 6                | 0              | -0.533435               | -0.690070 | -0.801508 |
| 22               | 1                | 0              | -0.181648               | -1.609197 | -1.270318 |
| 23               | 6                | 0              | -2.908219               | -1.471321 | -1.336191 |

|    |   |   |           |           |           |
|----|---|---|-----------|-----------|-----------|
| 24 | 1 | 0 | -2.921955 | -1.181617 | -2.399048 |
| 25 | 1 | 0 | -2.711134 | -2.545966 | -1.272848 |
| 26 | 8 | 0 | -4.162511 | -1.215654 | -0.733243 |
| 27 | 6 | 0 | -4.119796 | 0.103018  | -0.210432 |
| 28 | 1 | 0 | -4.883421 | 0.174358  | 0.568303  |
| 29 | 1 | 0 | -4.328547 | 0.847173  | -0.993261 |
| 30 | 6 | 0 | -2.696459 | 0.280596  | 0.302454  |
| 31 | 6 | 0 | -2.311020 | -0.723253 | 1.336066  |
| 32 | 1 | 0 | -2.364394 | 1.308112  | 0.429941  |
| 33 | 1 | 0 | -2.981490 | -1.571763 | 1.444890  |
| 34 | 6 | 0 | -1.153010 | -0.665470 | 2.104326  |
| 35 | 6 | 0 | -0.234242 | 0.359713  | 1.981370  |
| 36 | 1 | 0 | -0.873274 | -1.563498 | 2.651876  |
| 37 | 1 | 0 | 0.720072  | 0.314045  | 2.496133  |
| 38 | 1 | 0 | -0.584999 | 1.357934  | 1.748679  |

-----  
Zero-point correction= 0.318048 (Hartree/Particle)  
Thermal correction to Energy= 0.334957  
Thermal correction to Enthalpy= 0.335902  
Thermal correction to Gibbs Free Energy= 0.273940  
Sum of electronic and zero-point Energies= -883.615992  
Sum of electronic and thermal Energies= -883.599083  
Sum of electronic and thermal Enthalpies= -883.598138  
Sum of electronic and thermal Free Energies= -883.660100  
ωB97XD /6-311++G(d,p)-SDD/SMD//ωB97XD /6-31G(d)-LANL2DZ energy in chloroform solvent = -884.1780026

#### INT8b

-----

| Center<br>Number | Atomic<br>Number | Atomic<br>Type | Coordinates (Angstroms) |           |           |
|------------------|------------------|----------------|-------------------------|-----------|-----------|
|                  |                  |                | X                       | Y         | Z         |
| 1                | 6                | 0              | 1.679795                | -3.873875 | -0.369576 |
| 2                | 6                | 0              | 0.388935                | -4.177139 | -0.070096 |
| 3                | 6                | 0              | 0.553871                | -1.948016 | -0.176165 |
| 4                | 7                | 0              | 1.756572                | -2.497570 | -0.428603 |
| 5                | 1                | 0              | 2.538300                | -4.503104 | -0.543281 |
| 6                | 1                | 0              | -0.106813               | -5.124551 | 0.070497  |
| 7                | 7                | 0              | -0.283587               | -2.976769 | 0.044408  |
| 8                | 79               | 0              | 0.143239                | 0.080200  | -0.142964 |
| 9                | 6                | 0              | 2.916649                | -1.681500 | -0.670666 |
| 10               | 6                | 0              | 3.677336                | -1.276101 | 0.428936  |
| 11               | 6                | 0              | 3.153593                | -1.228806 | -1.971383 |
| 12               | 6                | 0              | 4.727868                | -0.394521 | 0.189420  |
| 13               | 6                | 0              | 4.209516                | -0.338829 | -2.155203 |
| 14               | 6                | 0              | 5.002756                | 0.089737  | -1.089191 |
| 15               | 1                | 0              | 5.332579                | -0.059378 | 1.027397  |
| 16               | 1                | 0              | 4.412789                | 0.036204  | -3.155345 |
| 17               | 6                | 0              | -1.669342               | -2.786231 | 0.379680  |
| 18               | 6                | 0              | -1.997932               | -2.537744 | 1.714026  |
| 19               | 6                | 0              | -2.613257               | -2.784579 | -0.651844 |
| 20               | 6                | 0              | -3.338745               | -2.291430 | 2.008970  |
| 21               | 6                | 0              | -3.938444               | -2.538316 | -0.302780 |
| 22               | 6                | 0              | -4.319494               | -2.285280 | 1.017364  |
| 23               | 1                | 0              | -3.623101               | -2.106934 | 3.042241  |
| 24               | 1                | 0              | -4.695780               | -2.537249 | -1.083193 |
| 25               | 6                | 0              | 2.271818                | -1.653110 | -3.117972 |
| 26               | 1                | 0              | 2.222856                | -2.743382 | -3.210956 |
| 27               | 1                | 0              | 1.243163                | -1.296254 | -2.982607 |
| 28               | 1                | 0              | 2.646452                | -1.252245 | -4.062734 |
| 29               | 6                | 0              | 6.140890                | 1.050211  | -1.316331 |
| 30               | 1                | 0              | 5.899024                | 1.776371  | -2.098201 |
| 31               | 1                | 0              | 6.384439                | 1.598484  | -0.401493 |
| 32               | 1                | 0              | 7.044058                | 0.515441  | -1.631999 |
| 33               | 6                | 0              | 3.338517                | -1.731114 | 1.824364  |
| 34               | 1                | 0              | 4.078750                | -1.366163 | 2.540081  |
| 35               | 1                | 0              | 2.358487                | -1.346612 | 2.132110  |
| 36               | 1                | 0              | 3.300792                | -2.822901 | 1.903378  |

|    |   |   |           |           |           |
|----|---|---|-----------|-----------|-----------|
| 37 | 6 | 0 | -2.202048 | -2.975677 | -2.087960 |
| 38 | 1 | 0 | -1.704008 | -2.072878 | -2.463356 |
| 39 | 1 | 0 | -1.511373 | -3.815696 | -2.212141 |
| 40 | 1 | 0 | -3.075019 | -3.162202 | -2.718381 |
| 41 | 6 | 0 | -5.763145 | -2.007912 | 1.348302  |
| 42 | 1 | 0 | -6.116235 | -1.110189 | 0.829160  |
| 43 | 1 | 0 | -6.403408 | -2.839036 | 1.034553  |
| 44 | 1 | 0 | -5.909278 | -1.856742 | 2.421091  |
| 45 | 6 | 0 | -0.941554 | -2.492533 | 2.788005  |
| 46 | 1 | 0 | -0.224011 | -3.314163 | 2.697473  |
| 47 | 1 | 0 | -0.374631 | -1.554699 | 2.730852  |
| 48 | 1 | 0 | -1.396930 | -2.552608 | 3.779896  |
| 49 | 6 | 0 | 0.093285  | 2.105571  | 0.685835  |
| 50 | 6 | 0 | 1.506874  | 2.261792  | 1.142555  |
| 51 | 6 | 0 | 1.982108  | 1.708625  | 2.343158  |
| 52 | 6 | 0 | 2.401567  | 2.974347  | 0.328634  |
| 53 | 6 | 0 | 3.306426  | 1.890800  | 2.723561  |
| 54 | 1 | 0 | 1.312048  | 1.144706  | 2.980144  |
| 55 | 6 | 0 | 3.721812  | 3.153932  | 0.714455  |
| 56 | 1 | 0 | 2.058497  | 3.384906  | -0.615320 |
| 57 | 6 | 0 | 4.178201  | 2.615971  | 1.916030  |
| 58 | 1 | 0 | 3.656067  | 1.467336  | 3.659948  |
| 59 | 1 | 0 | 4.395173  | 3.718703  | 0.077749  |
| 60 | 1 | 0 | 5.209867  | 2.762781  | 2.220967  |
| 61 | 6 | 0 | -1.047837 | 2.010366  | 1.688343  |
| 62 | 8 | 0 | -2.011023 | 2.735127  | 1.632418  |
| 63 | 8 | 0 | -0.897075 | 1.045591  | 2.601503  |
| 64 | 6 | 0 | -1.987356 | 0.894009  | 3.522901  |
| 65 | 1 | 0 | -1.666037 | 0.126753  | 4.225212  |
| 66 | 1 | 0 | -2.182276 | 1.835604  | 4.038392  |
| 67 | 1 | 0 | -2.881709 | 0.573704  | 2.983899  |
| 68 | 6 | 0 | -0.489414 | 1.754423  | -1.277066 |
| 69 | 6 | 0 | -0.358850 | 2.828226  | -0.538400 |
| 70 | 1 | 0 | -0.548486 | 3.884449  | -0.695901 |
| 71 | 6 | 0 | -0.921604 | 1.417454  | -2.679385 |
| 72 | 1 | 0 | -1.339571 | 2.352812  | -3.084939 |
| 73 | 1 | 0 | -0.055501 | 1.128658  | -3.281321 |
| 74 | 8 | 0 | -1.831311 | 0.359987  | -2.773636 |
| 75 | 6 | 0 | -3.032728 | 0.533694  | -2.012700 |
| 76 | 1 | 0 | -2.803644 | 0.453459  | -0.938795 |
| 77 | 1 | 0 | -3.644117 | -0.330286 | -2.286296 |
| 78 | 6 | 0 | -3.741020 | 1.823150  | -2.292301 |
| 79 | 6 | 0 | -3.847564 | 2.794444  | -1.376761 |
| 80 | 1 | 0 | -4.158052 | 1.953642  | -3.290363 |
| 81 | 1 | 0 | -3.404942 | 2.643808  | -0.390955 |
| 82 | 6 | 0 | -4.501197 | 4.080695  | -1.591773 |
| 83 | 6 | 0 | -4.528790 | 5.038402  | -0.660482 |
| 84 | 1 | 0 | -4.970473 | 4.245726  | -2.560533 |
| 85 | 1 | 0 | -5.012291 | 5.993653  | -0.837480 |
| 86 | 1 | 0 | -4.066139 | 4.890229  | 0.312807  |

-----  
Zero-point correction= 0.723456 (Hartree/Particle)  
Thermal correction to Energy= 0.768863  
Thermal correction to Enthalpy= 0.769807  
Thermal correction to Gibbs Free Energy= 0.642005  
Sum of electronic and zero-point Energies= -1942.416436  
Sum of electronic and thermal Energies= -1942.371028  
Sum of electronic and thermal Enthalpies= -1942.370084  
Sum of electronic and thermal Free Energies= -1942.497887  
ωB97XD /6-311++G(d,p)-SDD/SMD//ωB97XD /6-31G(d)-LANL2DZ energy in chloroform solvent = -1944.0223284

#### TS9b

-----

| Center Number | Atomic Number | Atomic Type | Coordinates (Angstroms) |           |          |
|---------------|---------------|-------------|-------------------------|-----------|----------|
|               |               |             | X                       | Y         | Z        |
| 1             | 6             | 0           | 1.329803                | -3.936708 | 0.235149 |

-----

|    |    |   |           |           |           |
|----|----|---|-----------|-----------|-----------|
| 2  | 6  | 0 | 0.003838  | -4.143141 | 0.433240  |
| 3  | 6  | 0 | 0.293516  | -1.958700 | -0.002392 |
| 4  | 7  | 0 | 1.483320  | -2.588694 | -0.031587 |
| 5  | 1  | 0 | 2.168791  | -4.614070 | 0.255224  |
| 6  | 1  | 0 | -0.552454 | -5.038361 | 0.661271  |
| 7  | 7  | 0 | -0.613110 | -2.915872 | 0.280944  |
| 8  | 79 | 0 | -0.105751 | 0.018720  | -0.474596 |
| 9  | 6  | 0 | 2.720722  | -1.910967 | -0.302895 |
| 10 | 6  | 0 | 3.410685  | -1.335698 | 0.766077  |
| 11 | 6  | 0 | 3.152275  | -1.813639 | -1.628669 |
| 12 | 6  | 0 | 4.602600  | -0.675439 | 0.477914  |
| 13 | 6  | 0 | 4.343412  | -1.131587 | -1.865821 |
| 14 | 6  | 0 | 5.085032  | -0.567353 | -0.826060 |
| 15 | 1  | 0 | 5.163628  | -0.227379 | 1.293290  |
| 16 | 1  | 0 | 4.704952  | -1.042797 | -2.887517 |
| 17 | 6  | 0 | -2.011980 | -2.629581 | 0.444663  |
| 18 | 6  | 0 | -2.498039 | -2.462165 | 1.745361  |
| 19 | 6  | 0 | -2.810654 | -2.463298 | -0.690373 |
| 20 | 6  | 0 | -3.834768 | -2.101466 | 1.894649  |
| 21 | 6  | 0 | -4.144629 | -2.113830 | -0.485009 |
| 22 | 6  | 0 | -4.670760 | -1.916041 | 0.791431  |
| 23 | 1  | 0 | -4.236370 | -1.964818 | 2.895853  |
| 24 | 1  | 0 | -4.790266 | -1.985369 | -1.350686 |
| 25 | 6  | 0 | 2.341905  | -2.403003 | -2.754204 |
| 26 | 1  | 0 | 2.162818  | -3.473491 | -2.606803 |
| 27 | 1  | 0 | 1.360850  | -1.918184 | -2.829970 |
| 28 | 1  | 0 | 2.853982  | -2.275987 | -3.710729 |
| 29 | 6  | 0 | 6.394487  | 0.122132  | -1.109091 |
| 30 | 1  | 0 | 6.348700  | 0.701824  | -2.036526 |
| 31 | 1  | 0 | 6.676426  | 0.795909  | -0.294815 |
| 32 | 1  | 0 | 7.199807  | -0.612510 | -1.223071 |
| 33 | 6  | 0 | 2.864146  | -1.398571 | 2.168413  |
| 34 | 1  | 0 | 3.580945  | -0.983810 | 2.881696  |
| 35 | 1  | 0 | 1.933929  | -0.822710 | 2.246190  |
| 36 | 1  | 0 | 2.641210  | -2.427257 | 2.472165  |
| 37 | 6  | 0 | -2.261309 | -2.606555 | -2.086866 |
| 38 | 1  | 0 | -1.880933 | -1.645591 | -2.458834 |
| 39 | 1  | 0 | -1.443931 | -3.331758 | -2.136435 |
| 40 | 1  | 0 | -3.045684 | -2.931568 | -2.775570 |
| 41 | 6  | 0 | -6.105212 | -1.489672 | 0.966537  |
| 42 | 1  | 0 | -6.219901 | -0.423616 | 0.738472  |
| 43 | 1  | 0 | -6.767311 | -2.042807 | 0.293529  |
| 44 | 1  | 0 | -6.450550 | -1.650522 | 1.991344  |
| 45 | 6  | 0 | -1.601970 | -2.671068 | 2.939276  |
| 46 | 1  | 0 | -1.391129 | -3.734579 | 3.099261  |
| 47 | 1  | 0 | -0.638370 | -2.165751 | 2.808694  |
| 48 | 1  | 0 | -2.072515 | -2.290305 | 3.849380  |
| 49 | 6  | 0 | 0.644826  | 2.214193  | 0.551155  |
| 50 | 6  | 0 | 2.077280  | 2.298642  | 0.755824  |
| 51 | 6  | 0 | 2.677025  | 2.175041  | 2.027061  |
| 52 | 6  | 0 | 2.889966  | 2.619789  | -0.352577 |
| 53 | 6  | 0 | 4.030754  | 2.425308  | 2.184056  |
| 54 | 1  | 0 | 2.076400  | 1.911599  | 2.887851  |
| 55 | 6  | 0 | 4.243786  | 2.853659  | -0.189370 |
| 56 | 1  | 0 | 2.443219  | 2.662220  | -1.340205 |
| 57 | 6  | 0 | 4.812758  | 2.770202  | 1.081603  |
| 58 | 1  | 0 | 4.480239  | 2.356156  | 3.169100  |
| 59 | 1  | 0 | 4.859744  | 3.098651  | -1.048005 |
| 60 | 1  | 0 | 5.872902  | 2.964876  | 1.212998  |
| 61 | 6  | 0 | -0.319300 | 1.950974  | 1.703240  |
| 62 | 8  | 0 | -1.301153 | 2.631072  | 1.862514  |
| 63 | 8  | 0 | 0.049152  | 0.959725  | 2.518428  |
| 64 | 6  | 0 | -0.866452 | 0.688105  | 3.590973  |
| 65 | 1  | 0 | -0.380009 | -0.072001 | 4.199381  |
| 66 | 1  | 0 | -1.053158 | 1.593404  | 4.170766  |
| 67 | 1  | 0 | -1.806491 | 0.312106  | 3.179362  |
| 68 | 6  | 0 | -0.540482 | 1.855902  | -1.287210 |



|    |   |   |           |          |           |
|----|---|---|-----------|----------|-----------|
| 69 | 6 | 0 | 0.018272  | 2.857899 | -0.608307 |
| 70 | 1 | 0 | 0.126526  | 3.911803 | -0.855814 |
| 71 | 6 | 0 | -1.102921 | 1.930893 | -2.681443 |
| 72 | 1 | 0 | -1.501978 | 2.949440 | -2.815295 |
| 73 | 1 | 0 | -0.302072 | 1.779006 | -3.412876 |
| 74 | 8 | 0 | -2.070390 | 0.958916 | -2.981070 |
| 75 | 6 | 0 | -3.201776 | 0.942972 | -2.108551 |
| 76 | 1 | 0 | -2.912354 | 0.529737 | -1.129934 |
| 77 | 1 | 0 | -3.888898 | 0.232058 | -2.576684 |
| 78 | 6 | 0 | -3.844869 | 2.282633 | -1.915760 |
| 79 | 6 | 0 | -3.789832 | 2.942203 | -0.751962 |
| 80 | 1 | 0 | -4.342599 | 2.724950 | -2.778118 |
| 81 | 1 | 0 | -3.260871 | 2.490524 | 0.088595  |
| 82 | 6 | 0 | -4.370491 | 4.258770 | -0.510784 |
| 83 | 6 | 0 | -4.230097 | 4.911294 | 0.646563  |
| 84 | 1 | 0 | -4.929117 | 4.711552 | -1.328766 |
| 85 | 1 | 0 | -4.664886 | 5.893284 | 0.803117  |
| 86 | 1 | 0 | -3.670547 | 4.478764 | 1.472670  |

-----  
Zero-point correction= 0.722816 (Hartree/Particle)

Thermal correction to Energy= 0.767521

Thermal correction to Enthalpy= 0.768465

Thermal correction to Gibbs Free Energy= 0.641969

Sum of electronic and zero-point Energies= -1942.412796

Sum of electronic and thermal Energies= -1942.368090

Sum of electronic and thermal Enthalpies= -1942.367146

Sum of electronic and thermal Free Energies= -1942.493642

ωB97XD /6-311++G(d,p)-SDD/SMD//ωB97XD /6-31G(d)-LANL2DZ energy in chloroform solvent = -1944.0165805

#### TS6b

| Center<br>Number | Atomic<br>Number | Atomic<br>Type | Coordinates (Angstroms) |           |           |
|------------------|------------------|----------------|-------------------------|-----------|-----------|
|                  |                  |                | X                       | Y         | Z         |
| 1                | 6                | 0              | 3.864398                | 1.525958  | 1.467541  |
| 2                | 6                | 0              | 4.066511                | 0.191701  | 1.584305  |
| 3                | 6                | 0              | 2.080739                | 0.499233  | 0.562735  |
| 4                | 7                | 0              | 2.641581                | 1.691954  | 0.839662  |
| 5                | 1                | 0              | 4.467598                | 2.369020  | 1.764697  |
| 6                | 1                | 0              | 4.883661                | -0.373374 | 2.003519  |
| 7                | 7                | 0              | 2.960208                | -0.421589 | 1.020406  |
| 8                | 79               | 0              | 0.360572                | 0.070579  | -0.453661 |
| 9                | 6                | 0              | 2.102422                | 2.949853  | 0.393354  |
| 10               | 6                | 0              | 1.241864                | 3.668148  | 1.224354  |
| 11               | 6                | 0              | 2.453059                | 3.381984  | -0.890928 |
| 12               | 6                | 0              | 0.742945                | 4.876174  | 0.739005  |
| 13               | 6                | 0              | 1.926084                | 4.593250  | -1.329333 |
| 14               | 6                | 0              | 1.074461                | 5.355527  | -0.527373 |
| 15               | 1                | 0              | 0.069834                | 5.453953  | 1.368074  |
| 16               | 1                | 0              | 2.185136                | 4.951257  | -2.322644 |
| 17               | 6                | 0              | 2.764232                | -1.831855 | 0.842554  |
| 18               | 6                | 0              | 2.262718                | -2.582741 | 1.911863  |
| 19               | 6                | 0              | 3.029860                | -2.392370 | -0.410621 |
| 20               | 6                | 0              | 2.015217                | -3.936037 | 1.694024  |
| 21               | 6                | 0              | 2.762110                | -3.753320 | -0.578896 |
| 22               | 6                | 0              | 2.252007                | -4.538083 | 0.454411  |
| 23               | 1                | 0              | 1.632926                | -4.540839 | 2.513868  |
| 24               | 1                | 0              | 2.965930                | -4.210904 | -1.544218 |
| 25               | 6                | 0              | 3.338353                | 2.547577  | -1.781030 |
| 26               | 1                | 0              | 4.277066                | 2.274998  | -1.286023 |
| 27               | 1                | 0              | 2.836513                | 1.615052  | -2.066930 |
| 28               | 1                | 0              | 3.586297                | 3.088367  | -2.697411 |
| 29               | 6                | 0              | 0.533148                | 6.676902  | -1.009409 |
| 30               | 1                | 0              | 0.676715                | 6.800789  | -2.086211 |
| 31               | 1                | 0              | -0.536254               | 6.768672  | -0.795159 |
| 32               | 1                | 0              | 1.040118                | 7.509460  | -0.508102 |
| 33               | 6                | 0              | 0.798742                | 3.148139  | 2.566116  |

|    |   |   |           |           |           |
|----|---|---|-----------|-----------|-----------|
| 34 | 1 | 0 | 0.670536  | 3.968038  | 3.278459  |
| 35 | 1 | 0 | -0.168784 | 2.646782  | 2.451741  |
| 36 | 1 | 0 | 1.509783  | 2.434770  | 2.993517  |
| 37 | 6 | 0 | 3.548811  | -1.565252 | -1.559061 |
| 38 | 1 | 0 | 2.728314  | -1.044390 | -2.069416 |
| 39 | 1 | 0 | 4.258387  | -0.802762 | -1.224872 |
| 40 | 1 | 0 | 4.051098  | -2.199940 | -2.293680 |
| 41 | 6 | 0 | 1.959672  | -6.002484 | 0.252248  |
| 42 | 1 | 0 | 2.151175  | -6.311526 | -0.778672 |
| 43 | 1 | 0 | 2.581421  | -6.620107 | 0.909031  |
| 44 | 1 | 0 | 0.913295  | -6.228947 | 0.485530  |
| 45 | 6 | 0 | 2.002384  | -1.944875 | 3.251219  |
| 46 | 1 | 0 | 2.939407  | -1.742336 | 3.782054  |
| 47 | 1 | 0 | 1.481334  | -0.989040 | 3.141341  |
| 48 | 1 | 0 | 1.399014  | -2.599245 | 3.886061  |
| 49 | 6 | 0 | -3.188718 | 0.093216  | -0.138928 |
| 50 | 6 | 0 | -4.646759 | 0.161403  | 0.101136  |
| 51 | 6 | 0 | -5.194254 | 1.177728  | 0.895891  |
| 52 | 6 | 0 | -5.502166 | -0.798274 | -0.457133 |
| 53 | 6 | 0 | -6.566294 | 1.241653  | 1.106527  |
| 54 | 1 | 0 | -4.546620 | 1.935888  | 1.324967  |
| 55 | 6 | 0 | -6.872622 | -0.734605 | -0.239041 |
| 56 | 1 | 0 | -5.089672 | -1.612313 | -1.046689 |
| 57 | 6 | 0 | -7.408555 | 0.287461  | 0.541239  |
| 58 | 1 | 0 | -6.979116 | 2.041841  | 1.712417  |
| 59 | 1 | 0 | -7.523418 | -1.488021 | -0.671412 |
| 60 | 1 | 0 | -8.479303 | 0.337676  | 0.711264  |
| 61 | 6 | 0 | -2.345581 | 0.572694  | 1.011413  |
| 62 | 8 | 0 | -2.023589 | 1.728026  | 1.166553  |
| 63 | 8 | 0 | -2.090360 | -0.403272 | 1.886054  |
| 64 | 6 | 0 | -1.350026 | -0.011795 | 3.044667  |
| 65 | 1 | 0 | -1.251526 | -0.913964 | 3.647357  |
| 66 | 1 | 0 | -0.366835 | 0.364437  | 2.750990  |
| 67 | 1 | 0 | -1.885101 | 0.763366  | 3.597877  |
| 68 | 6 | 0 | -1.254145 | -0.437991 | -1.665113 |
| 69 | 6 | 0 | -2.668815 | -0.304098 | -1.319880 |
| 70 | 1 | 0 | -3.389764 | -0.517004 | -2.112864 |
| 71 | 6 | 0 | -0.955670 | -0.131786 | -3.141185 |
| 72 | 1 | 0 | -1.820061 | -0.358707 | -3.789635 |
| 73 | 1 | 0 | -0.734224 | 0.936082  | -3.231264 |
| 74 | 8 | 0 | 0.182903  | -0.836320 | -3.550739 |
| 75 | 6 | 0 | 0.022648  | -2.203215 | -3.206353 |
| 76 | 1 | 0 | 0.973273  | -2.564437 | -2.800094 |
| 77 | 1 | 0 | -0.219506 | -2.788940 | -4.102255 |
| 78 | 6 | 0 | -1.096169 | -2.359034 | -2.193524 |
| 79 | 6 | 0 | -0.864076 | -2.797475 | -0.905496 |
| 80 | 1 | 0 | -2.095003 | -2.521293 | -2.596818 |
| 81 | 1 | 0 | 0.159780  | -2.813318 | -0.531567 |
| 82 | 6 | 0 | -1.904417 | -3.166598 | 0.010200  |
| 83 | 6 | 0 | -1.632895 | -3.344411 | 1.312444  |
| 84 | 1 | 0 | -2.921474 | -3.246510 | -0.363401 |
| 85 | 1 | 0 | -2.411846 | -3.579371 | 2.030108  |
| 86 | 1 | 0 | -0.616768 | -3.242750 | 1.686610  |

Zero-point correction= 0.723990 (Hartree/Particle)

Thermal correction to Energy= 0.768415

Thermal correction to Enthalpy= 0.769359

Thermal correction to Gibbs Free Energy= 0.643818

Sum of electronic and zero-point Energies= -1942.434589

Sum of electronic and thermal Energies= -1942.390164

Sum of electronic and thermal Enthalpies= -1942.389220

Sum of electronic and thermal Free Energies= -1942.514761

ωB97XD /6-311++G(d,p)-SDD/SMD//ωB97XD /6-31G(d)-LANL2DZ energy in chloroform solvent = -1944.0348418

### (1S,5R)-3b

Center Atomic Atomic Coordinates (Angstroms)

| Number | Number | Type | X         | Y         | Z         |
|--------|--------|------|-----------|-----------|-----------|
| 1      | 6      | 0    | 1.933808  | -0.838213 | -0.388818 |
| 2      | 6      | 0    | 0.652674  | -0.605601 | -0.657495 |
| 3      | 1      | 0    | 0.245233  | -1.045565 | -1.565634 |
| 4      | 6      | 0    | 2.834350  | -1.678250 | -1.281544 |
| 5      | 1      | 0    | 2.473158  | -2.701410 | -1.421726 |
| 6      | 1      | 0    | 2.937649  | -1.207107 | -2.272051 |
| 7      | 8      | 0    | 4.088536  | -1.741130 | -0.626853 |
| 8      | 6      | 0    | 4.210467  | -0.554503 | 0.124875  |
| 9      | 1      | 0    | 4.488188  | 0.296658  | -0.520808 |
| 10     | 1      | 0    | 4.996214  | -0.701775 | 0.869684  |
| 11     | 6      | 0    | 2.818980  | -0.319834 | 0.731547  |
| 12     | 6      | 0    | 2.547775  | 1.096917  | 1.160710  |
| 13     | 1      | 0    | 2.715353  | -0.993325 | 1.596965  |
| 14     | 1      | 0    | 3.382855  | 1.795584  | 1.156856  |
| 15     | 6      | 0    | 1.337401  | 1.504631  | 1.532880  |
| 16     | 6      | 0    | 0.148994  | 0.577672  | 1.550098  |
| 17     | 1      | 0    | 1.174225  | 2.539594  | 1.821139  |
| 18     | 1      | 0    | 0.420342  | -0.355040 | 2.060173  |
| 19     | 1      | 0    | -0.669794 | 1.032384  | 2.111512  |
| 20     | 6      | 0    | -0.355337 | 0.211821  | 0.136780  |
| 21     | 6      | 0    | -1.676298 | -0.586963 | 0.180126  |
| 22     | 6      | 0    | -2.390080 | -0.790154 | -1.007046 |
| 23     | 6      | 0    | -2.174033 | -1.151578 | 1.354693  |
| 24     | 6      | 0    | -3.565600 | -1.530910 | -1.017749 |
| 25     | 1      | 0    | -2.024340 | -0.356837 | -1.934020 |
| 26     | 6      | 0    | -3.351568 | -1.896496 | 1.344989  |
| 27     | 1      | 0    | -1.651586 | -1.020300 | 2.295596  |
| 28     | 6      | 0    | -4.052805 | -2.089152 | 0.160778  |
| 29     | 1      | 0    | -4.101373 | -1.671253 | -1.951978 |
| 30     | 1      | 0    | -3.719224 | -2.326559 | 2.272095  |
| 31     | 1      | 0    | -4.971570 | -2.667953 | 0.155140  |
| 32     | 6      | 0    | -0.652469 | 1.495316  | -0.655093 |
| 33     | 8      | 0    | -0.445017 | 1.647469  | -1.835412 |
| 34     | 8      | 0    | -1.227346 | 2.431630  | 0.114822  |
| 35     | 6      | 0    | -1.592930 | 3.633900  | -0.560242 |
| 36     | 1      | 0    | -2.015749 | 4.284285  | 0.204971  |
| 37     | 1      | 0    | -0.716304 | 4.097966  | -1.018282 |
| 38     | 1      | 0    | -2.332648 | 3.425288  | -1.337025 |

Zero-point correction= 0.321146 (Hartree/Particle)

Thermal correction to Energy= 0.338198

Thermal correction to Enthalpy= 0.339142

Thermal correction to Gibbs Free Energy= 0.275960

Sum of electronic and zero-point Energies= -883.674150

Sum of electronic and thermal Energies= -883.657098

Sum of electronic and thermal Enthalpies= -883.656154

Sum of electronic and thermal Free Energies= -883.719335

ωB97XD /6-311++G(d,p)-SDD/SMD//ωB97XD /6-31G(d)-LANL2DZ energy in chloroform solvent = -884.2409625
